# Supplementary material for: Single-cell transcriptomics reveals age-resistant maintenance of cell identities, stem cell compartments and differentiation trajectories in long-lived naked mole-rats skin
Source: PubMed Central journal article supplement (PMC9134947; doi:10.18632/aging.204054), 2022-05-04
Supplement: aging-14-204054-s002.pdf [file aging-14-204054-s002.pdf]

## SUPPLEMENTARY TABLE

Supplementary Table 1. Characteristics of antibodies used for immunohistochemistry.

| Reagent or resource | Dilution | Species | Source           | Identifier | Section method |
|---------------------|----------|---------|------------------|------------|----------------|
| <b>Antibodies</b>   |          |         |                  |            |                |
| Keratin-14          | 1:1000   | rabbit  | Biologend        | 905301     | paraffin       |
| Keratin-10          | 1:1000   | rabbit  | Biologend        | 905401     | cryo           |
| Loricrin            | 1:1000   | rabbit  | Biologend        | 905101     | paraffin       |
| Filaggrin           | 1:500    | rabbit  | Biologend        | 905801     | paraffin       |
| Laminin-5           | 1:200    | rabbit  | Abcam            | ab14509    | cryo           |
| ITGB4               | 1:250    | rabbit  | Abcam            | ab182120   | paraffin       |
| Ki67                | 1:400    | rabbit  | Abcam            | ab15580    | cryo           |
| Collagen I          | 1:250    | rabbit  | Abcam            | ab21286    | paraffin       |
| p16                 | 1:100    | rabbit  | ThermoScientific | PA1-30670  | cryo           |
| Hyaluronic acid     | 1,6:100  | bovine  | Calbiochem       | 385911     | paraffin       |
| IGFBP3              | 1:500    | rabbit  | Abcam            | 272857     | cryo           |
