# Supplementary material for: Single-cell transcriptomics reveals age-resistant maintenance of cell identities, stem cell compartments and differentiation trajectories in long-lived naked mole-rats skin
Source: Aging (Albany NY). 2022 May 4;14(9):3728–56. doi: 10.18632/aging.204054 (PMC9134947; doi:10.18632/aging.204054)
Supplement: Supplementary Data File 1 [file aging-14-204054-s003.xlsx]

## Sheet: S1A. Genes of interest summary
Supplementary Data File 1A. List of 98 characteristic genes of epidermal populations.
EnsemblId	Gene
ENSHGLG00000009998	CCR7
ENSHGLG00000001784	CD163
ENSHGLG00000010838	CD19
ENSHGLG00000017785	CD3D
ENSHGLG00000018122	CD3E
ENSHGLG00000017797	CD3G
ENSHGLG00000004194	CD4
ENSHGLG00000021050	CXCR2
ENSHGLG00000010419	ITGAX
ENSHGLG00000001162	KRT1
ENSHGLG00000015766	MLANA
ENSHGLG00000008573	PTPRC
ENSHGLG00000002950	ACTA2
ENSHGLG00000019071	ALOX12B
ENSHGLG00000005838	ANLN
ENSHGLG00000008000	C1orf68
ENSHGLG00000001002	CCL2
ENSHGLG00000017278	CD207
ENSHGLG00000003902	CD74
ENSHGLG00000006336	CDC20
ENSHGLG00000008904	CDKN2A
ENSHGLG00000013311	CDKN2D
ENSHGLG00000012348	CDSN
ENSHGLG00000007874	CENPA
ENSHGLG00000007762	CYP4F22
ENSHGLG00000012921	DNASE1L2
ENSHGLG00000018510	DSC3
ENSHGLG00000009349	EPS8L1
ENSHGLG00000007826	FAM83G
ENSHGLG00000004816	FGFR3
ENSHGLG00000004863	GRHL1
ENSHGLG00000011226	GSDMA
ENSHGLG00000017048	HLA-DMA
ENSHGLG00000016652	HLA-DOB
ENSHGLG00000019266	HLA-DPA1
ENSHGLG00000019389	HLA-DPB1
ENSHGLG00000012243	HLA-DRA
ENSHGLG00000008232	HOPX
ENSHGLG00000004922	KLK11
ENSHGLG00000014543	KLK5
ENSHGLG00000006861	KLK9
ENSHGLG00000010577	KRT10
ENSHGLG00000014633	KRT14
ENSHGLG00000017682	KRT15
ENSHGLG00000000726	KRT5
ENSHGLG00000006748	KRTDAP
ENSHGLG00000009594	LCE5A
ENSHGLG00000007076	LGALS7
ENSHGLG00000006560	LOR
ENSHGLG00000010689	LY6D
ENSHGLG00000002992	LYPD5
ENSHGLG00000007005	OTX1
ENSHGLG00000003095	POF1B
ENSHGLG00000000277	POSTN
ENSHGLG00000010418	PTGS1
ENSHGLG00000008073	PTTG1
ENSHGLG00000015078	SBSN
ENSHGLG00000002536	SERPINB7
ENSHGLG00000007288	SERPINH1
ENSHGLG00000017405	SLURP1
ENSHGLG00000003157	TGM1
ENSHGLG00000014880	THY1
ENSHGLG00000016277	TP63
ENSHGLG00000015349	TP73
ENSHGLG00000008010	TREX2
ENSHGLG00000001054	TYR
ENSHGLG00000014282	VEGFA
ENSHGLG00000008081	Vim
ENSHGLG00000004217	CD34
ENSHGLG00000015457	Cebpa
ENSHGLG00000003598	COL17A1
ENSHGLG00000001404	COL3A1
ENSHGLG00000002416	COL4A1
ENSHGLG00000019184	COL4A4
ENSHGLG00000014456	COL4A5
ENSHGLG00000008359	DSP
ENSHGLG00000013138	GLI1
ENSHGLG00000012904	ITGA3
ENSHGLG00000010983	ITGA6
ENSHGLG00000008225	ITGB1
ENSHGLG00000004560	ITGB4
ENSHGLG00000020740	JUN
ENSHGLG00000003839	LGR6
ENSHGLG00000002916	LRIG1
ENSHGLG00000011967	NOTCH1
ENSHGLG00000015205	NOTCH2
ENSHGLG00000006380	NOTCH3
ENSHGLG00000004528	PRDM1
ENSHGLG00000006368	TFAP2C
ENSHGLG00000016132	THBS1
ENSHGLG00000003676	CASP14
ENSHGLG00000011357	Pou5F1
ENSHGLG00000006922	MYC
ENSHGLG00000013140	NES
ENSHGLG00000011829	SOX9
ENSHGLG00000004517	CCND2
ENSHGLG00000017033	CDKN1A
ENSHGLG00000016974	Pcna

## Sheet: S1B. Marker genes top25
Supplementary Data File 1B. Top 25 marker genes for each cluster of epidermal cells from young and middle-aged naked mole-rats.
Markers = default Seurat v3 values, min.pct 0.1 and log.fc 0.25. Comparison = Cluster X vs all other cells. Clusters markers for wo2V dataset.
	avg_logFC	p_val_adj	cluster	gene	cluster_name
1	0.406151	6.42576e-184	0	AQP3	Sp1
2	0.357512	3.03357e-148		MT4
3	0.307261	3.32293e-148		EIF4A1
4	0.487921	4.12981e-137		RHOV
5	0.423782	6.06616e-125		EHF
6	0.379193	3.07224e-94		MYC
7	0.364378	5.28917e-87		ENSHGLG00000004445
8	0.342929	4.79558e-86		ATF4
9	0.309945	1.42708e-76		NR4A1
10	0.261005	1.31875e-75		HSPA8
11	0.483341	2.27966e-74		PLK2
12	0.44084	4.723e-74		RND3
13	0.323692	4.86216e-69		KCNK1
14	0.307631	1.19702e-67		CCNL1
15	0.299895	3.13294e-66		ENSHGLG00000007207
16	0.278957	1.07236e-55		ENSHGLG00000006687
17	0.28316	4.23076e-50		DUSP5
18	0.406298	3.02204e-47		F3
19	0.435393	2.41305e-46		PLAU
20	0.265161	4.04404e-45		WSB1
21	0.264302	1.38331e-42		ENSHGLG00000006307
22	0.401601	3.17644e-34		HES1
23	0.349521	2.57311e-28		ID3
24	0.341731	8.24404e-25		ADM
25	0.354665	1.78089e-22		CXCL8
1	1.01154	0	1	SOCS3	BSC3
2	0.981852	0		IGFBP3
3	0.947832	0		DLL1
4	0.943854	0		IGFBP6
5	0.887649	0		ENSHGLG00000010931
6	0.854572	0		RARRES2
7	0.824543	0		TNC
8	0.822879	0		KRT14
9	0.806422	0		PRXL2A
10	0.7762	0		SERPINH1
11	0.683196	0		ENSHGLG00000000124
12	0.660534	0		BCAM
13	0.869722	4.5561e-300		IGFBP2
14	0.591847	2.635e-280		SPARC
15	0.370004	6.99034e-274		ENSHGLG00000007713
16	0.398783	2.47241e-272		ENSHGLG00000002542
17	0.578006	1.44434e-264		ENSHGLG00000004606
18	0.923363	8.11799e-264		GEM
19	0.587421	4.35689e-253		MOXD1
20	0.478828	5.25389e-244		PDGFA
21	0.593523	1.14438e-240		THBS2
22	0.495149	2.86999e-240		CAV1
23	0.579621	6.90678e-240		ENSHGLG00000007955
24	0.594507	6.53698e-239		ASCL2
25	0.518988	1.67978e-238		ACKR3
1	1.05413	0	2	KRT10	Gr1
2	0.931973	0		KRT1
3	0.825028	0		PDZK1IP1
4	0.765494	0		KRTDAP
5	0.57268	0		ENSHGLG00000017932
6	0.42223	2.3102e-303		SPINK5
7	0.628745	1.04643e-301		THEM5
8	0.634412	4.75147e-297		RAB25
9	0.786723	5.61813e-282		SLURP1
10	0.65563	7.50428e-273		GLTP
11	0.780114	5.22101e-269		ENSHGLG00000017088
12	0.55276	1.07705e-268		CLIC3
13	0.556597	1.37142e-265		MAB21L4
14	0.6427	1.21712e-261		ENSHGLG00000007207
15	0.615545	6.3747e-255		ENSHGLG00000014707
16	0.644626	8.72432e-252		ENDOU
17	0.686185	5.59192e-250		RHOV
18	0.551435	3.37445e-239		ELOVL4
19	0.599421	2.09824e-235		CTNNBIP1
20	0.556771	2.71816e-234		ENSHGLG00000000385
21	0.58808	1.17144e-232		SH3YL1
22	0.48893	8.2099e-232		SPTSSB
23	0.450786	1.54823e-225		S100A14
24	0.783433	2.53173e-222		PLK2
25	0.565525	3.3107e-219		RGCC
1	2.16921	0	3	ENSHGLG00000006094	BPSC
2	1.88126	0		UBE2C
3	1.82106	0		TUBB
4	1.70807	0		ENSHGLG00000011685
5	1.3997	0		H2AFV
6	1.33829	0		UBE2S
7	1.28448	0		BIRC5
8	1.26617	0		CDC20
9	1.26587	0		H2AFZ
10	1.26173	0		CDKN3
11	1.2462	0		ENSHGLG00000016353
12	1.24585	0		PTTG1
13	1.20228	0		STMN1
14	1.17457	0		TUBB4B
15	1.15998	0		KIF20B
16	1.15908	0		CENPF
17	1.15065	0		CDCA3
18	1.14429	0		TOP2A
19	1.13326	0		CCNB2
20	1.11605	0		CKS1B
21	1.10908	0		ASPM
22	1.0925	0		DUT
23	1.0656	0		CENPA
24	1.01255	0		ENSHGLG00000002130
25	0.971049	0		PRC1
1	0.388528	2.96777e-197	4	LGALS7	Sp2
2	0.532652	5.97705e-197		MT4
3	0.7498	7.268e-149		KRT10
4	0.447157	1.29297e-145		LY6D
5	0.392089	4.84976e-130		S100A14
6	0.425663	1.88958e-116		AQP3
7	0.441612	7.06465e-89		SH3BGRL3
8	0.516449	4.09258e-88		ENSHGLG00000000004
9	0.271928	1.70197e-76		KRTDAP
10	0.430469	2.12723e-71		ENDOU
11	0.32315	4.57025e-66		THEM5
12	0.280741	1.91009e-62		S100A16
13	0.41604	2.36806e-62		SLURP1
14	0.319286	3.43864e-55		RAB25
15	0.424813	9.36823e-46		ENSHGLG00000000002
16	0.304138	4.75958e-41		KRT1
17	0.262261	3.49545e-34		MGST3
18	0.340918	5.49172e-29		MAB21L4
19	0.346284	5.62174e-29		ENSHGLG00000016672
20	0.336851	7.83939e-29		PDZK1IP1
21	0.26588	7.85139e-29		ENSHGLG00000014166
22	0.276371	1.14849e-26		CTNNBIP1
23	0.267771	9.44901e-26		MGST1
24	0.266752	3.96921e-22		DSG1
25	0.308485	3.6155e-20		ENSHGLG00000004445
1	1.81976	0	5	CLIC3	Gr2
2	1.78365	0		CNFN
3	1.74809	0		SPINK5
4	1.69426	0		LY6G6C
5	1.58652	0		ENSHGLG00000017088
6	1.50692	0		ENSHGLG00000002786
7	1.39408	0		LYPD3
8	1.33739	0		DGAT2
9	1.29978	0		SBSN
10	1.29363	0		DAPL1
11	1.29162	0		SULT2B1
12	1.26133	0		ENSHGLG00000006883
13	1.24455	0		RGCC
14	1.16997	0		KRTDAP
15	1.16104	0		HOPX
16	1.13854	0		LGALSL
17	1.12446	0		GRHL1
18	1.08864	0		ENSHGLG00000007309
19	1.06867	0		SDR16C5
20	1.04512	0		ENSHGLG00000017932
21	1.02397	0		SLURP1
22	1.01997	0		ITPRID2
23	0.991138	0		SH3YL1
24	0.983491	0		ELOVL4
25	0.968141	0		ENSHGLG00000014707
1	1.00514	0	6	RARRES2	BSC1
2	0.907239	9.2164e-284		BCAM
3	0.840368	1.66089e-280		PRXL2A
4	0.511253	1.62233e-260		ENSHGLG00000015814
5	0.717502	1.2195e-258		KRT5
6	0.980703	1.29642e-229		IGFBP6
7	0.832176	9.4593e-212		S100A4
8	0.725295	1.1307e-203		KRT14
9	0.639247	9.60966e-192		S100P
10	0.666938	3.52924e-174		CYBA
11	0.767393	4.42599e-173		ASCL2
12	0.534118	1.93474e-169		CSTB
13	0.681876	5.94644e-164		TNC
14	0.50083	7.3342e-164		ENSHGLG00000013637
15	0.632853	1.20967e-161		PARK7
16	0.674647	6.62074e-158		RAMP1
17	0.794648	1.66236e-157		IGFBP2
18	0.607053	4.32393e-141		MOXD1
19	0.61679	1.55409e-140		NUPR1
20	0.611812	2.76553e-132		ENSHGLG00000004606
21	0.702194	2.92597e-131		CRLF1
22	0.380405	6.98366e-129		TMSB4Y
23	0.625534	2.24811e-128		SPARC
24	0.600494	2.10234e-123		THBS2
25	0.565148	2.59165e-118		DST
1	0.874056	3.08058e-256	7	SOCS3	BSC2
2	0.693329	2.63041e-255		ENSHGLG00000000124
3	0.812908	6.36589e-243		TNC
4	0.871879	4.42099e-230		ENSHGLG00000010931
5	0.704082	5.26233e-210		PRXL2A
6	1.10231	2.13305e-207		GEM
7	0.67442	6.59565e-197		RARRES2
8	0.615651	1.05872e-185		S100P
9	0.560773	2.99606e-166		DLL1
10	0.623308	1.31582e-164		ENSHGLG00000007955
11	0.582361	1.29247e-160		BCAM
12	0.637269	1.81487e-160		S100A4
13	0.587417	1.86433e-154		ACKR3
14	0.600561	2.39565e-151		IGFBP6
15	0.594556	1.50889e-149		SERPINH1
16	0.526871	5.74435e-140		RAMP1
17	0.513271	3.26875e-134		C1S
18	0.338787	1.44369e-133		ENSHGLG00000015814
19	0.50139	1.60621e-133		CYBA
20	0.522144	8.16212e-131		MOXD1
21	0.474084	9.30696e-129		Ftl
22	0.492197	3.95717e-127		ARHGDIB
23	0.560467	5.24069e-127		IGFBP2
24	0.501819	2.45945e-121		CPE
25	0.473366	1.40529e-120		ENSHGLG00000012164
1	4.98733	0	8	LOR	Cor
2	4.6569	0		ENSHGLG00000008670
3	3.63549	0		Cryab
4	3.53699	0		ENSHGLG00000020738
5	3.45403	0		C1orf68
6	3.22705	0		LCE5A
7	2.72833	0		LYPD2
8	2.62345	0		SERPINA12
9	2.52977	0		ENSHGLG00000029515
10	2.47876	0		KRT23
11	2.25804	0		LCE1C
12	2.2279	0		WFDC5
13	2.20482	0		ANXA9
14	2.11612	0		ENSHGLG00000012992
15	2.04536	0		ENSHGLG00000020457
16	2.00125	0		ENSHGLG00000007169
17	1.92062	0		LYZ
18	1.9168	0		KRT80
19	1.89576	0		SPINK7
20	1.87113	0		CYSRT1
21	1.8564	0		DNASE1L2
22	1.82595	0		IL36RN
23	1.78861	0		FAM89A
24	1.7575	0		CTSH
25	1.71452	0		GDPD3
1	1.25292	8.21896e-130	9	DSP	Gr3
2	1.18589	2.16077e-119		COX2
3	1.23004	3.41607e-119		COX3
4	1.22039	9.09141e-118		ND2
5	1.24453	2.56085e-117		ATP6
6	1.31633	6.07535e-114		ZFP36L1
7	1.12071	4.64739e-110		COX1
8	1.29289	4.89137e-109		ND3
9	1.57904	3.52099e-106		LYPD3
10	1.28547	1.09273e-105		PKP1
11	1.10151	2.42442e-104		ND4
12	1.1647	4.5931e-100		ND1
13	1.21612	1.05033e-99		CYTB
14	1.34183	3.94986e-96		EHF
15	0.7276	1.07797e-90		ACTG1
16	1.40703	6.67293e-90		CLDN1
17	1.34291	1.30756e-86		ITPRID2
18	1.23346	1.78276e-80		MIDN
19	1.25599	2.60364e-79		SPINK5
20	1.23724	1.43813e-78		ND6
21	1.13685	5.57812e-77		ETS2
22	1.16788	5.71564e-76		NFKBIZ
23	0.931602	6.30802e-76		BTG2
24	1.14751	6.98729e-75		HOMER2
25	1.26821	1.23962e-73		ENSHGLG00000018639
1	4.53559	0	10	ENSHGLG00000011613	Immune
2	4.48916	0		HLA-DRA
3	4.40399	0		ENSHGLG00000011013
4	4.25848	0		RGS1
5	4.23788	0		HLA-DPA1
6	4.18942	0		Vim
7	3.92179	0		ENSHGLG00000011398
8	3.75238	0		CD207
9	3.51472	0		TYROBP
10	3.04536	0		IL1B
11	2.89342	0		LGALS1
12	2.622	0		ALOX5AP
13	2.35513	0		CD83
14	2.3066	0		C15orf48
15	2.22671	0		PTPRC
16	2.16177	0		ENSHGLG00000017060
17	2.07958	0		CORO1A
18	1.95998	0		HPGDS
19	1.95398	0		HLA-DMA
20	1.95129	0		ENSHGLG00000009734
21	1.94017	0		SPI1
22	1.77499	0		ITM2A
23	1.68754	0		LCP1
24	1.67876	0		CD74
25	1.64374	0		ENSHGLG00000009138

## Sheet: S1C. Marker genes default
Supplementary Data File 1C. Differentially expressed gene signatures for each cluster of epidermal cells from young and middle-aged naked mole-rats.
Markers = default Seurat v3 values, min.pct 0.1 and log.fc 0.25. Comparison = Cluster X vs all other cells. Clusters markers for wo2V dataset.
p_val	avg_logFC	pct.1	pct.2	p_val_adj	cluster	gene	cluster_name
3.26844e-188	0.406151	0.999	0.963	6.42576e-184	0	AQP3	Sp1
1.54301e-152	0.357512	0.999	0.985	3.03357e-148	0	MT4
1.6902e-152	0.307261	0.999	0.98	3.32293e-148	0	EIF4A1
2.10062e-141	0.487921	0.844	0.512	4.12981e-137	0	RHOV
3.08554e-129	0.423782	0.883	0.637	6.06616e-125	0	EHF
1.56269e-98	0.379193	0.978	0.853	3.07224e-94	0	MYC
2.69032e-91	0.364378	0.891	0.728	5.28917e-87	0	ENSHGLG00000004445
2.43926e-90	0.342929	0.964	0.877	4.79558e-86	0	ATF4
7.25881e-81	0.309945	0.912	0.701	1.42708e-76	0	NR4A1
6.7078e-80	0.261005	0.996	0.96	1.31875e-75	0	HSPA8
1.15954e-78	0.483341	0.645	0.435	2.27966e-74	0	PLK2
2.40234e-78	0.44084	0.708	0.507	4.723e-74	0	RND3
2.47312e-73	0.323692	0.854	0.686	4.86216e-69	0	KCNK1
6.08862e-72	0.307631	0.812	0.631	1.19702e-67	0	CCNL1
1.59356e-70	0.299895	0.998	0.97	3.13294e-66	0	ENSHGLG00000007207
5.45452e-60	0.278957	0.943	0.799	1.07236e-55	0	ENSHGLG00000006687
2.15196e-54	0.28316	0.781	0.571	4.23076e-50	0	DUSP5
1.53715e-51	0.406298	0.563	0.391	3.02204e-47	0	F3
1.22739e-50	0.435393	0.573	0.417	2.41305e-46	0	PLAU
2.05699e-49	0.265161	0.738	0.567	4.04404e-45	0	WSB1
7.03618e-47	0.264302	0.781	0.653	1.38331e-42	0	ENSHGLG00000006307
1.61569e-38	0.401601	0.846	0.75	3.17644e-34	0	HES1
1.30881e-32	0.349521	0.76	0.669	2.57311e-28	0	ID3
4.19331e-29	0.341731	0.477	0.35	8.24404e-25	0	ADM
9.05845e-27	0.354665	0.287	0.179	1.78089e-22	0	CXCL8
2.34238e-17	0.262885	0.561	0.476	4.60511e-13	0	ID1
0	1.01154	0.993	0.702	0	1	SOCS3	BSC3
0	0.981852	0.824	0.344	0	1	IGFBP3
0	0.947832	0.795	0.239	0	1	DLL1
0	0.943854	0.947	0.497	0	1	IGFBP6
0	0.887649	0.927	0.529	0	1	ENSHGLG00000010931
0	0.854572	0.975	0.477	0	1	RARRES2
0	0.824543	0.86	0.334	0	1	TNC
0	0.822879	1	0.809	0	1	KRT14
0	0.806422	0.999	0.789	0	1	PRXL2A
0	0.7762	0.857	0.331	0	1	SERPINH1
0	0.683196	1	1	0	1	ENSHGLG00000000124
0	0.660534	0.977	0.56	0	1	BCAM
2.31745e-304	0.869722	0.778	0.318	4.5561e-300	1	IGFBP2
1.34029e-284	0.591847	0.665	0.229	2.635e-280	1	SPARC
3.55562e-278	0.370004	1	0.992	6.99034e-274	1	ENSHGLG00000007713
1.25758e-276	0.398783	1	0.997	2.47241e-272	1	ENSHGLG00000002542
7.34657e-269	0.578006	0.882	0.464	1.44434e-264	1	ENSHGLG00000004606
4.12919e-268	0.923363	0.784	0.399	8.11799e-264	1	GEM
2.21612e-257	0.587421	0.907	0.514	4.35689e-253	1	MOXD1
2.67238e-248	0.478828	0.585	0.192	5.25389e-244	1	PDGFA
5.82084e-245	0.593523	0.652	0.248	1.14438e-240	1	THBS2
1.45981e-244	0.495149	0.696	0.27	2.86999e-240	1	CAV1
3.51311e-244	0.579621	0.995	0.9	6.90678e-240	1	ENSHGLG00000007955
3.32501e-243	0.594507	0.752	0.336	6.53698e-239	1	ASCL2
8.54414e-243	0.518988	0.544	0.167	1.67978e-238	1	ACKR3
8.77235e-227	0.572383	0.933	0.607	1.72464e-222	1	NUPR1
5.72306e-224	0.495206	0.678	0.27	1.12515e-219	1	C1S
2.35273e-212	0.536022	0.917	0.65	4.62548e-208	1	CPE
2.14322e-211	0.471868	0.53	0.181	4.21356e-207	1	COL14A1
2.56133e-209	0.478778	0.364	0.088	5.03557e-205	1	SERPINE1
2.80232e-207	0.556788	0.991	0.851	5.50936e-203	1	MYC
6.71387e-206	0.493764	0.694	0.305	1.31995e-201	1	CRLF1
1.00179e-205	0.468238	0.993	0.936	1.96952e-201	1	Ftl
1.53014e-205	0.490149	0.632	0.255	3.00826e-201	1	RAMP1
1.12091e-192	0.555774	0.912	0.655	2.20371e-188	1	BHLHE40
1.08456e-189	0.595091	0.938	0.697	2.13225e-185	1	NR4A1
1.84566e-185	0.446029	0.596	0.248	3.62857e-181	1	RPRML
5.92338e-185	0.446176	0.58	0.241	1.16454e-180	1	DSG2
1.45297e-178	0.299233	0.999	0.984	2.85653e-174	1	ENSHGLG00000015814
1.56442e-176	0.470443	0.915	0.615	3.07564e-172	1	TGFBI
2.96702e-175	0.332529	0.362	0.096	5.83315e-171	1	DLK2
1.72649e-172	1.01918	0.746	0.494	3.39428e-168	1	ENSHGLG00000007289
4.85026e-172	0.880886	0.692	0.393	9.53561e-168	1	TSC22D1
1.25098e-171	0.461278	0.949	0.754	2.45943e-167	1	ENSHGLG00000012164
9.42499e-171	0.504606	1	0.969	1.85295e-166	1	Fos
2.67949e-168	0.370606	1	0.999	5.26787e-164	1	CSTB
1.08953e-167	0.484715	0.785	0.476	2.14202e-163	1	KLF9
3.68551e-165	0.409496	0.602	0.264	7.24571e-161	1	SERPINB6
2.64726e-164	0.33907	0.999	0.989	5.20451e-160	1	TMSB4Y
3.54177e-162	0.430507	0.86	0.543	6.96311e-158	1	Clu
7.45433e-162	0.421996	0.657	0.319	1.46552e-157	1	CAV2
6.61035e-160	0.411701	0.618	0.282	1.2996e-155	1	WNT10A
1.116e-157	0.43889	0.776	0.453	2.19405e-153	1	ARHGDIB
2.42975e-156	0.451886	0.894	0.618	4.7769e-152	1	ATP1A1
2.25357e-151	0.471823	1	0.906	4.43052e-147	1	KRT5
1.75504e-149	0.481757	0.75	0.463	3.45041e-145	1	Azin1
1.59863e-148	0.362031	0.396	0.132	3.14292e-144	1	EFEMP1
8.58816e-148	0.344655	0.468	0.173	1.68843e-143	1	TP73
1.18426e-146	0.396492	0.986	0.867	2.32825e-142	1	S100A4
2.2206e-146	0.445378	0.636	0.332	4.3657e-142	1	ZFP36L2
5.87864e-145	0.645162	0.987	0.887	1.15574e-140	1	NFKBIA
2.08677e-141	0.381445	0.998	0.847	4.10259e-137	1	S100P
2.10235e-141	0.512695	0.91	0.657	4.13322e-137	1	ENSHGLG00000015816
2.06632e-138	0.387372	0.614	0.307	4.06239e-134	1	ACTN1
5.04471e-138	0.267346	0.352	0.109	9.9179e-134	1	RSU1
3.33057e-136	0.26678	0.255	0.061	6.5479e-132	1	EVA1C
5.4328e-136	0.409225	0.616	0.322	1.06809e-131	1	P3H2
1.85596e-135	0.438352	0.655	0.361	3.64882e-131	1	ENSHGLG00000007375
1.68918e-134	0.417419	0.972	0.876	3.32092e-130	1	ENSHGLG00000015168
1.76268e-134	0.392901	0.751	0.452	3.46543e-130	1	FGFR2
1.39312e-132	0.386083	0.558	0.259	2.73887e-128	1	CCDC3
3.82801e-131	0.507681	0.68	0.404	7.52586e-127	1	IER3
1.2178e-126	0.406861	0.684	0.408	2.39419e-122	1	AJUBA
6.1944e-126	0.324684	0.718	0.388	1.21782e-121	1	CYBA
8.82413e-126	0.310099	0.991	0.931	1.73482e-121	1	ENSHGLG00000012780
1.39305e-125	0.404657	0.583	0.3	2.73874e-121	1	LAMC2
8.85621e-125	0.321868	0.999	0.943	1.74113e-120	1	GAPDH
1.02902e-123	0.303712	0.493	0.208	2.02305e-119	1	ITIH5
7.2662e-122	0.281333	0.23	0.057	1.42854e-117	1	JDP2
1.0183e-121	0.371352	0.581	0.302	2.00198e-117	1	WLS
6.5073e-120	0.465742	0.979	0.89	1.27934e-115	1	Sat1
6.93231e-120	0.332809	0.975	0.86	1.36289e-115	1	ENSHGLG00000012755
5.30885e-119	0.415451	0.569	0.295	1.04372e-114	1	ATF3
7.62968e-119	0.26674	0.343	0.118	1.49999e-114	1	ITGA3
4.60522e-118	0.437562	0.436	0.186	9.05386e-114	1	IL1R2
4.76057e-115	0.279745	0.424	0.169	9.35928e-111	1	JAG2
1.61703e-114	0.37639	0.507	0.249	3.17908e-110	1	ZNF503
6.95744e-111	0.359709	0.746	0.483	1.36783e-106	1	LAMP2
3.74513e-108	0.257803	0.318	0.11	7.36292e-104	1	SLCO2A1
7.77668e-108	0.388035	0.769	0.514	1.52889e-103	1	CSRNP1
1.1283e-107	0.450831	0.342	0.128	2.21823e-103	1	ADAMTS1
2.71851e-106	0.284082	1	0.935	5.34458e-102	1	ENSHGLG00000013637
3.41802e-105	0.375229	0.593	0.313	6.71982e-101	1	SMOC2
7.72479e-104	0.302486	0.389	0.158	1.51869e-99	1	MXRA5
9.6977e-103	0.266988	0.34	0.127	1.90657e-98	1	ZBTB16
4.02453e-102	0.253906	0.357	0.136	7.91223e-98	1	LFNG
7.32489e-102	0.311968	0.98	0.855	1.44007e-97	1	DST
7.82081e-102	0.286462	0.425	0.183	1.53757e-97	1	ENSHGLG00000030882
1.10495e-101	0.33507	0.483	0.237	2.17234e-97	1	PLEKHF1
1.58442e-101	0.273268	0.992	0.931	3.11498e-97	1	RPL21
6.98914e-101	0.317644	0.417	0.186	1.37407e-96	1	RBBP8
4.32515e-97	0.327003	0.546	0.297	8.50325e-93	1	LIMA1
2.04668e-96	0.295026	0.58	0.32	4.02377e-92	1	ITGB4
1.16275e-94	0.250913	0.259	0.083	2.28597e-90	1	NDUFA4L2
1.60287e-94	0.326124	0.762	0.529	3.15125e-90	1	G3BP2
4.20594e-94	0.30243	0.683	0.421	8.26888e-90	1	GNAI2
6.10671e-94	0.306603	0.544	0.288	1.20058e-89	1	S100A13
3.74572e-92	0.355539	0.972	0.918	7.36408e-88	1	ENSHGLG00000014414
4.1669e-92	0.349671	0.883	0.681	8.19212e-88	1	KCNK1
1.18294e-90	0.264554	0.381	0.164	2.32567e-86	1	ANXA3
1.25854e-90	0.325819	0.326	0.131	2.47429e-86	1	ENSHGLG00000017126
9.76045e-90	0.286408	0.532	0.284	1.9189e-85	1	EPHX1
1.8345e-88	0.307019	0.491	0.253	3.60662e-84	1	ENSHGLG00000019467
2.68728e-88	0.273492	0.88	0.624	5.28319e-84	1	KRT17
6.60604e-87	0.389027	0.668	0.441	1.29875e-82	1	ENSHGLG00000016780
4.23295e-84	0.355924	0.691	0.448	8.32199e-80	1	TMSB10
2.00667e-83	0.323129	0.886	0.715	3.94511e-79	1	KLF10
8.06181e-83	0.295133	0.692	0.447	1.58495e-78	1	ITGB1
3.89396e-81	0.258115	0.395	0.179	7.65553e-77	1	LGALS3BP
3.97092e-80	0.316044	0.792	0.586	7.80682e-76	1	CD81
2.30393e-79	0.28503	0.614	0.375	4.52953e-75	1	SOX15
5.88456e-78	0.323777	0.351	0.157	1.1569e-73	1	FST
1.73261e-76	0.318341	0.686	0.463	3.40632e-72	1	SLC2A1
3.46925e-76	0.277686	0.408	0.207	6.82054e-72	1	PXDC1
8.18026e-76	0.343024	0.76	0.558	1.60824e-71	1	ENSHGLG00000007665
3.2237e-75	0.290349	0.562	0.336	6.33779e-71	1	FKBP11
8.35407e-75	0.288318	0.781	0.563	1.64241e-70	1	GDPD2
1.53666e-74	0.268224	0.494	0.272	3.02107e-70	1	AK1
1.30018e-73	0.275534	0.521	0.307	2.55615e-69	1	BAIAP2
4.58786e-73	0.276594	0.553	0.332	9.01973e-69	1	DKK3
2.16674e-71	0.278775	0.706	0.49	4.25981e-67	1	SPPL2A
3.54521e-71	0.429458	0.277	0.117	6.96989e-67	1	ENSHGLG00000001040
3.06137e-70	0.254052	0.62	0.381	6.01865e-66	1	ITGA6
1.48961e-69	0.775842	0.211	0.076	2.92856e-65	1	CCL2
2.06092e-69	0.263297	0.49	0.279	4.05177e-65	1	FHL3
4.88134e-69	0.254481	0.509	0.292	9.59671e-65	1	ENSHGLG00000001693
7.87777e-69	0.290876	0.2	0.068	1.54877e-64	1	CDO1
1.74717e-67	0.309788	0.687	0.498	3.43493e-63	1	DBP
4.34476e-67	0.302715	0.573	0.377	8.54179e-63	1	ERF
3.29003e-65	0.310031	0.817	0.67	6.4682e-61	1	GSTM3
2.63942e-64	0.338204	0.615	0.43	5.1891e-60	1	ENSHGLG00000007594
4.71094e-63	0.353179	0.763	0.566	9.26171e-59	1	ERRFI1
6.15839e-63	0.301334	0.797	0.592	1.21074e-58	1	PIM1
6.4152e-63	0.259592	0.812	0.593	1.26123e-58	1	DNAJB4
1.05095e-61	0.263376	0.375	0.188	2.06616e-57	1	ENSHGLG00000015774
2.61863e-61	0.262624	0.836	0.66	5.14823e-57	1	APP
7.7316e-61	0.296612	0.767	0.575	1.52003e-56	1	IRX3
7.08261e-57	0.277941	0.456	0.27	1.39244e-52	1	SERPINB11
3.70336e-55	0.257145	0.69	0.509	7.2808e-51	1	ENSHGLG00000017250
5.53911e-55	0.506874	0.44	0.269	1.08899e-50	1	CXCL14
2.41337e-54	0.323552	0.889	0.808	4.74469e-50	1	TPPP3
3.25931e-54	0.25035	0.511	0.325	6.4078e-50	1	CEBPD
5.25988e-53	0.258925	0.625	0.442	1.03409e-48	1	ENSHGLG00000012581
4.37531e-51	0.330508	0.167	0.06	8.60186e-47	1	GBP1
5.05522e-50	0.433682	0.451	0.283	9.93856e-46	1	CCN1
8.91535e-50	0.34786	0.49	0.335	1.75276e-45	1	GADD45B
1.99931e-49	0.260864	0.625	0.455	3.93065e-45	1	JMJD1C
3.1882e-47	0.250449	0.541	0.364	6.268e-43	1	TNFRSF12A
5.984e-44	0.250141	0.599	0.432	1.17645e-39	1	BAG3
5.5975e-34	0.376492	0.28	0.161	1.10047e-29	1	RRAD
3.02241e-15	0.434788	0.26	0.184	5.94205e-11	1	CXCL8
0	1.05413	1	0.685	0	2	KRT10	Gr1
0	0.931973	0.973	0.491	0	2	KRT1
0	0.825028	0.917	0.368	0	2	PDZK1IP1
0	0.765494	1	0.998	0	2	KRTDAP
0	0.57268	1	0.998	0	2	ENSHGLG00000017932
1.17507e-307	0.42223	0.951	0.384	2.3102e-303	2	SPINK5
5.32263e-306	0.628745	1	0.965	1.04643e-301	2	THEM5
2.41682e-301	0.634412	0.995	0.866	4.75147e-297	2	RAB25
2.85764e-286	0.786723	0.967	0.54	5.61813e-282	2	SLURP1
3.81703e-277	0.65563	0.995	0.774	7.50428e-273	2	GLTP
2.65565e-273	0.780114	0.977	0.685	5.22101e-269	2	ENSHGLG00000017088
5.47836e-273	0.55276	0.899	0.379	1.07705e-268	2	CLIC3
6.97568e-270	0.556597	0.708	0.227	1.37142e-265	2	MAB21L4
6.19086e-266	0.6427	0.999	0.971	1.21712e-261	2	ENSHGLG00000007207
3.24247e-259	0.615545	0.975	0.62	6.3747e-255	2	ENSHGLG00000014707
4.4376e-256	0.644626	0.915	0.487	8.72432e-252	2	ENDOU
2.84431e-254	0.686185	0.96	0.511	5.59192e-250	2	RHOV
1.7164e-243	0.551435	0.846	0.339	3.37445e-239	2	ELOVL4
1.06726e-239	0.599421	0.972	0.598	2.09824e-235	2	CTNNBIP1
1.38258e-238	0.556771	0.645	0.212	2.71816e-234	2	ENSHGLG00000000385
5.95847e-237	0.58808	0.939	0.565	1.17144e-232	2	SH3YL1
4.17594e-236	0.48893	0.719	0.248	8.2099e-232	2	SPTSSB
7.87503e-230	0.450786	0.999	0.993	1.54823e-225	2	S100A14
1.28776e-226	0.783433	0.821	0.42	2.53173e-222	2	PLK2
1.68398e-223	0.565525	0.889	0.439	3.3107e-219	2	RGCC
4.22327e-217	0.342627	1	0.997	8.30295e-213	2	ENSHGLG00000013614
3.0698e-212	0.523309	0.989	0.85	6.03523e-208	2	SLC25A5
5.02656e-211	0.378394	0.997	0.854	9.88222e-207	2	DAPL1
4.87966e-206	0.45161	1	0.986	9.5934e-202	2	MT4
8.02786e-200	0.534813	0.918	0.547	1.57828e-195	2	ENSHGLG00000013426
1.33816e-198	0.30356	0.707	0.247	2.63083e-194	2	ENSHGLG00000006883
3.14046e-193	0.410516	0.589	0.186	6.17414e-189	2	RBP2
1.70213e-188	0.5241	0.999	0.927	3.34638e-184	2	BTG2
5.76447e-186	0.33719	1	0.986	1.13329e-181	2	DSP
1.74716e-176	0.599244	0.914	0.643	3.43492e-172	2	EHF
1.84027e-176	0.402274	0.611	0.217	3.61797e-172	2	BPIFC
7.08185e-170	0.411882	0.513	0.17	1.39229e-165	2	LY6G6D
3.24273e-168	0.381505	1	0.975	6.37521e-164	2	DYNLL1
6.68417e-168	0.435926	0.876	0.49	1.31411e-163	2	TMEM40
2.34325e-165	0.413572	0.813	0.385	4.60683e-161	2	SDR16C5
9.03893e-164	0.335543	0.323	0.073	1.77705e-159	2	CLDN7
7.68926e-163	0.463763	0.935	0.653	1.51171e-158	2	BNIPL
2.67679e-162	0.401482	0.519	0.177	5.26257e-158	2	IL34
8.22657e-162	0.421398	0.549	0.196	1.61734e-157	2	EGR3
6.29282e-159	0.901426	0.729	0.405	1.23717e-154	2	SERPINB2
5.03775e-154	0.586944	0.868	0.568	9.90422e-150	2	DUSP5
3.19531e-153	0.45017	0.776	0.401	6.28198e-149	2	ENSHGLG00000010822
3.38547e-150	0.257353	0.954	0.64	6.65584e-146	2	LYPD3
1.38082e-146	0.486434	0.537	0.215	2.7147e-142	2	ENSHGLG00000000482
3.18558e-142	0.454025	0.751	0.394	6.26286e-138	2	TMEM45A
4.13617e-142	0.344455	1	0.992	8.1317e-138	2	LY6D
5.22106e-141	0.330025	0.997	0.965	1.02646e-136	2	EIF3L
4.87683e-139	0.331876	0.602	0.239	9.58784e-135	2	MBOAT2
8.56e-139	0.425957	0.513	0.2	1.6829e-134	2	CRABP2
2.0052e-138	0.460105	0.853	0.559	3.94222e-134	2	CDKN1A
1.64301e-135	0.256432	0.798	0.43	3.23015e-131	2	SULT2B1
3.00327e-130	0.402388	0.692	0.325	5.90442e-126	2	ENSHGLG00000010028
7.89086e-130	0.319713	0.576	0.228	1.55134e-125	2	DBNDD2
2.70048e-129	0.325016	0.352	0.104	5.30915e-125	2	ENSHGLG00000000065
3.33533e-128	0.388365	0.866	0.559	6.55726e-124	2	SERINC2
5.45656e-126	0.442778	0.85	0.587	1.07276e-121	2	CLDN1
1.55588e-121	0.321638	0.82	0.481	3.05886e-117	2	LGALSL
2.65126e-120	0.322403	0.507	0.204	5.21238e-116	2	SHLD2
3.13792e-120	0.313048	0.996	0.936	6.16915e-116	2	SERPINB5
1.688e-118	0.353399	0.846	0.528	3.31861e-114	2	MYCBP2
3.43486e-116	0.374389	0.714	0.391	6.75293e-112	2	DOK4
8.7019e-115	0.318473	0.872	0.564	1.71079e-110	2	ENSHGLG00000018639
2.48047e-112	0.358169	0.757	0.416	4.8766e-108	2	Ndrg2
3.6178e-112	0.388962	0.723	0.39	7.1126e-108	2	CWH43
5.27992e-112	0.417238	0.826	0.562	1.03803e-107	2	WSB1
4.86521e-111	0.381334	0.724	0.399	9.56499e-107	2	KLC3
1.34771e-110	0.343257	0.999	0.996	2.6496e-106	2	ACTB
1.52778e-107	0.375337	0.956	0.835	3.00361e-103	2	ENSHGLG00000018736
2.42884e-106	0.37908	0.626	0.318	4.7751e-102	2	OVOL1
2.58387e-105	0.344964	0.953	0.795	5.0799e-101	2	ENSHGLG00000005289
3.06605e-105	0.314802	0.968	0.874	6.02785e-101	2	TGIF2-RAB5IF
1.86139e-104	0.326669	0.538	0.245	3.65949e-100	2	ENSHGLG00000010544
2.22867e-104	0.330504	0.705	0.373	4.38157e-100	2	TMEM54
1.39008e-102	0.297094	0.617	0.299	2.7329e-98	2	Aox4
1.54728e-100	0.351429	0.711	0.402	3.04195e-96	2	CCDC12
3.46717e-98	0.317552	0.973	0.857	6.81646e-94	2	H2AFJ
8.29252e-98	0.49801	0.482	0.222	1.63031e-93	2	ENSHGLG00000002277
2.30691e-96	0.27501	0.989	0.942	4.53539e-92	2	ATOX1
7.53071e-96	0.287379	0.483	0.206	1.48054e-91	2	ZNRF1
3.38599e-94	0.267269	0.992	0.916	6.65685e-90	2	ZFP36L1
3.67545e-93	0.426944	0.643	0.376	7.22594e-89	2	ENSHGLG00000003147
2.32996e-92	0.593469	0.654	0.386	4.5807e-88	2	F3
2.79355e-92	0.298311	0.822	0.528	5.49213e-88	2	CERS2
5.46922e-92	0.257038	0.431	0.177	1.07525e-87	2	ANKRD35
2.73914e-91	0.300801	0.966	0.837	5.38515e-87	2	NDUFC1
3.97465e-91	0.352473	0.5	0.234	7.81416e-87	2	HMGCS1
1.0901e-90	0.29976	0.454	0.199	2.14314e-86	2	NFIL3
2.25152e-90	0.317641	0.555	0.284	4.42649e-86	2	ENSHGLG00000000389
2.24069e-89	0.351355	0.607	0.326	4.40519e-85	2	FDFT1
1.3593e-88	0.433805	0.269	0.085	2.67238e-84	2	SOX9
5.1584e-88	0.250794	0.993	0.945	1.01414e-83	2	S100A16
9.25278e-88	0.331534	0.778	0.509	1.8191e-83	2	PIM3
1.04285e-87	0.342656	0.637	0.357	2.05025e-83	2	RDH12
2.51219e-86	0.285874	0.93	0.748	4.93897e-82	2	OSTF1
3.47209e-86	0.529161	0.808	0.617	6.82614e-82	2	ENSHGLG00000012398
8.75868e-86	0.310035	0.909	0.717	1.72196e-81	2	TOB1
1.27461e-85	0.310628	0.77	0.479	2.50588e-81	2	UGT1A6
5.1735e-84	0.290715	0.998	0.943	1.01711e-79	2	KLF6
2.43926e-83	0.29642	0.9	0.682	4.79559e-79	2	EMP2
4.2937e-79	0.258288	0.413	0.18	8.44141e-75	2	ENSHGLG00000004047
7.07855e-79	0.267105	0.521	0.262	1.39164e-74	2	ADAM15
2.53322e-78	0.29458	0.999	0.961	4.98031e-74	2	HSPA8
2.12126e-75	0.272058	0.483	0.232	4.17039e-71	2	DSG1
8.48664e-75	0.296416	0.597	0.331	1.66847e-70	2	ACP5
1.085e-74	0.284198	0.946	0.842	2.13312e-70	2	ENSHGLG00000015490
7.31259e-73	0.310759	0.909	0.71	1.43765e-68	2	NFKBIZ
4.02829e-72	0.25354	0.907	0.719	7.91961e-68	2	RORA
4.35478e-71	0.277254	0.924	0.744	8.5615e-67	2	XBP1
1.16691e-68	0.369697	0.633	0.398	2.29415e-64	2	HS3ST1
1.14621e-67	0.26231	0.667	0.413	2.25346e-63	2	SLC25A25
6.19979e-67	0.392666	0.742	0.511	1.21888e-62	2	RND3
1.98877e-62	0.273875	0.602	0.36	3.90993e-58	2	DHRS7
1.76525e-60	0.303654	0.67	0.44	3.47048e-56	2	EIF1AX
5.19947e-59	0.330721	0.691	0.471	1.02222e-54	2	Herpud1
1.86994e-58	0.265417	0.764	0.538	3.6763e-54	2	MIEN1
2.05181e-58	0.251442	0.951	0.756	4.03385e-54	2	PTN
6.00203e-57	0.264285	0.897	0.776	1.18e-52	2	RAB10
2.54429e-56	0.286808	0.602	0.37	5.00207e-52	2	IFRD1
2.40466e-54	0.258388	0.888	0.743	4.72756e-50	2	PPP1R14C
6.79462e-54	0.283659	0.624	0.402	1.33582e-49	2	DNAJB9
3.4395e-48	0.264228	0.643	0.451	6.76206e-44	2	NPEPPS
3.667e-46	0.265887	0.821	0.656	7.20931e-42	2	YWHAH
3.05916e-42	0.284836	0.918	0.808	6.01432e-38	2	HSPA5
1.32077e-41	0.250885	0.925	0.808	2.59664e-37	2	ENSHGLG00000006687
7.96982e-36	0.266062	0.176	0.071	1.56687e-31	2	ENSHGLG00000029517
0	2.16921	0.988	0.389	0	3	ENSHGLG00000006094	BPSC
0	1.88126	0.817	0.12	0	3	UBE2C
0	1.82106	0.998	0.74	0	3	TUBB
0	1.70807	0.994	0.851	0	3	ENSHGLG00000011685
0	1.3997	0.995	0.733	0	3	H2AFV
0	1.33829	0.837	0.312	0	3	UBE2S
0	1.28448	0.903	0.116	0	3	BIRC5
0	1.26617	0.735	0.033	0	3	CDC20
0	1.26587	1	0.965	0	3	H2AFZ
0	1.26173	0.608	0.028	0	3	CDKN3
0	1.2462	0.981	0.654	0	3	ENSHGLG00000016353
0	1.24585	0.778	0.22	0	3	PTTG1
0	1.20228	0.907	0.182	0	3	STMN1
0	1.17457	0.971	0.795	0	3	TUBB4B
0	1.15998	0.751	0.043	0	3	KIF20B
0	1.15908	0.701	0.036	0	3	CENPF
0	1.15065	0.703	0.025	0	3	CDCA3
0	1.14429	0.719	0.017	0	3	TOP2A
0	1.13326	0.667	0.017	0	3	CCNB2
0	1.11605	0.984	0.602	0	3	CKS1B
0	1.10908	0.614	0.058	0	3	ASPM
0	1.0925	0.967	0.557	0	3	DUT
0	1.0656	0.63	0.018	0	3	CENPA
0	1.01255	0.641	0.175	0	3	ENSHGLG00000002130
0	0.971049	0.694	0.032	0	3	PRC1
0	0.965745	0.87	0.21	0	3	SMC2
0	0.941604	0.87	0.299	0	3	ENSHGLG00000011736
0	0.939471	0.698	0.025	0	3	NUF2
0	0.930905	0.711	0.081	0	3	KIF22
0	0.896225	0.686	0.032	0	3	SPC25
0	0.887831	0.812	0.146	0	3	CENPW
0	0.847963	1	0.986	0	3	HMGB1
0	0.843548	0.873	0.412	0	3	ENSHGLG00000010848
0	0.838736	0.631	0.021	0	3	CDCA8
0	0.833841	0.785	0.11	0	3	SPC24
0	0.823462	0.688	0.064	0	3	PBK
0	0.802076	0.772	0.139	0	3	LMNB1
0	0.801242	0.684	0.072	0	3	ANLN
0	0.777061	0.627	0.02	0	3	ENSHGLG00000029243
0	0.771335	0.842	0.313	0	3	CMC2
0	0.758208	0.753	0.201	0	3	ENSHGLG00000005468
0	0.755284	0.59	0.015	0	3	NUSAP1
0	0.745046	0.963	0.678	0	3	RANBP1
0	0.713496	0.996	0.907	0	3	HNRNPA2B1
0	0.708618	0.574	0.017	0	3	ENSHGLG00000005315
0	0.703028	0.557	0.044	0	3	KNSTRN
0	0.693526	0.545	0.027	0	3	HMMR
0	0.692644	0.536	0.024	0	3	KIF23
0	0.691137	1	1	0	3	ENSHGLG00000001587
0	0.671597	0.994	0.898	0	3	Ran
0	0.667959	0.597	0.062	0	3	PKMYT1
0	0.661717	0.597	0.047	0	3	TACC3
0	0.636698	0.579	0.02	0	3	OIP5
0	0.634949	0.516	0.068	0	3	CLSPN
0	0.621703	0.631	0.066	0	3	CENPK
0	0.611449	0.519	0.048	0	3	TK1
0	0.611447	0.507	0.022	0	3	RACGAP1
0	0.610052	0.997	0.974	0	3	PFN1
0	0.600257	0.517	0.007	0	3	CEP55
0	0.596136	0.509	0.007	0	3	ENSHGLG00000019335
0	0.575212	0.542	0.058	0	3	NCAPG2
0	0.570781	0.487	0.01	0	3	ENSHGLG00000028212
0	0.563036	0.551	0.089	0	3	UBE2T
0	0.562984	0.599	0.12	0	3	ENSHGLG00000000206
0	0.561826	0.999	0.996	0	3	RBM3
0	0.552958	0.608	0.086	0	3	TRIP13
0	0.540819	0.513	0.058	0	3	MIS18BP1
0	0.54001	0.465	0.005	0	3	SGO1
0	0.538684	0.603	0.115	0	3	CENPS
0	0.538071	0.581	0.077	0	3	ZWINT
0	0.533996	0.536	0.069	0	3	CLEC11A
0	0.531478	0.548	0.067	0	3	ENSHGLG00000009203
0	0.528389	0.538	0.046	0	3	NCAPG
0	0.524534	0.398	0.017	0	3	PLK1
0	0.499819	0.604	0.136	0	3	RAD51AP1
0	0.493616	0.552	0.066	0	3	ENSHGLG00000000557
0	0.491842	0.507	0.044	0	3	ENSHGLG00000031692
0	0.482887	0.519	0.077	0	3	ENSHGLG00000025263
0	0.473742	0.47	0.034	0	3	NEK2
0	0.470204	0.544	0.089	0	3	POC1A
0	0.456332	0.408	0.017	0	3	MXD3
0	0.44075	0.463	0.057	0	3	KNL1
0	0.438642	0.394	0.01	0	3	DLGAP5
0	0.425829	0.386	0.006	0	3	NDC80
0	0.409903	0.453	0.057	0	3	ATAD2
0	0.400696	0.391	0.012	0	3	BUB1B
0	0.385628	0.375	0.025	0	3	PSRC1
0	0.384359	0.383	0.016	0	3	CENPL
0	0.372488	0.385	0.009	0	3	CKAP2L
0	0.359948	0.358	0.011	0	3	DIAPH3
0	0.347423	0.354	0.039	0	3	ENSHGLG00000030543
0	0.331427	0.233	0.003	0	3	HIST1H1B
0	0.325418	0.268	0.003	0	3	ENSHGLG00000006609
0	0.323354	0.305	0.007	0	3	BUB1
0	0.322983	0.366	0.033	0	3	MIS18A
0	0.318584	0.339	0.018	0	3	CENPT
0	0.309572	0.302	0.007	0	3	CENPE
0	0.306254	0.338	0.028	0	3	NCAPH
0	0.301808	0.328	0.032	0	3	UHRF1
0	0.297274	0.311	0.019	0	3	TPX2
0	0.280974	0.285	0.011	0	3	FBXO5
0	0.277975	0.307	0.028	0	3	RHNO1
0	0.263101	0.263	0.01	0	3	TNFAIP8L1
0	0.256217	0.231	0.01	0	3	TROAP
0	0.255034	0.273	0.02	0	3	ENSHGLG00000014395
9.30823e-304	0.327167	0.349	0.042	1.83e-299	3	NCAPD2
9.953e-299	0.372827	0.444	0.074	1.95676e-294	3	CDK5RAP2
2.73119e-298	0.396644	0.491	0.092	5.36952e-294	3	CENPM
3.39806e-291	0.393824	0.489	0.093	6.68058e-287	3	ENSHGLG00000007414
6.26848e-289	0.477365	0.625	0.163	1.23238e-284	3	ENSHGLG00000005848
8.27346e-282	0.255401	0.295	0.029	1.62656e-277	3	ENSHGLG00000003078
9.89052e-282	0.274269	0.319	0.036	1.94448e-277	3	KIF18A
1.24343e-273	0.587126	0.993	0.848	2.44459e-269	3	ENSHGLG00000005767
3.04921e-272	0.861061	0.867	0.492	5.99476e-268	3	CKS2
1.48297e-271	0.439474	0.582	0.143	2.91552e-267	3	ENSHGLG00000001970
6.11202e-271	0.429316	0.527	0.118	1.20162e-266	3	MNS1
6.32244e-267	0.621826	0.965	0.71	1.24299e-262	3	ENSHGLG00000002725
2.06015e-263	1.07245	0.845	0.454	4.05025e-259	3	ARL6IP1
1.28475e-259	0.442573	0.581	0.149	2.52583e-255	3	CENPH
2.09971e-256	0.323342	0.381	0.062	4.12803e-252	3	CDCA2
1.24515e-254	0.270408	0.324	0.043	2.44796e-250	3	NCAPD3
2.51897e-252	0.61468	0.876	0.425	4.95229e-248	3	LSM6
3.70721e-246	0.369575	1	0.996	7.28837e-242	3	ENSHGLG00000008280
6.6614e-246	0.660009	0.926	0.645	1.30963e-241	3	RHEB
1.70405e-245	0.641271	0.972	0.753	3.35016e-241	3	ENSHGLG00000015004
1.73709e-245	0.565321	0.517	0.13	3.41511e-241	3	ENSHGLG00000031582
2.30028e-244	0.617122	0.807	0.348	4.52235e-240	3	ENSHGLG00000006290
1.22474e-232	0.336503	0.436	0.089	2.40784e-228	3	IMPDH1
3.25481e-232	0.572685	0.797	0.367	6.39895e-228	3	DDX39A
2.35711e-231	0.307649	0.328	0.05	4.63407e-227	3	CDC45
7.11622e-230	0.279954	0.345	0.056	1.39905e-225	3	ENSHGLG00000010287
1.28975e-226	0.362611	0.442	0.094	2.53565e-222	3	BRCA2
6.17338e-222	0.386672	0.448	0.104	1.21369e-217	3	CDKN2C
6.76337e-221	0.276362	0.342	0.057	1.32968e-216	3	DCK
5.11607e-220	0.285522	0.374	0.069	1.00582e-215	3	POLE2
1.09656e-218	0.612128	0.78	0.363	2.15584e-214	3	RAD21
4.13363e-218	0.429453	0.62	0.189	8.12671e-214	3	SULF2
4.97775e-218	0.416524	0.538	0.147	9.78626e-214	3	FEN1
1.91005e-216	0.581744	0.984	0.753	3.75516e-212	3	PTN
1.44341e-215	0.450128	0.99	0.915	2.83774e-211	3	ENSHGLG00000010707
1.46885e-215	0.492446	0.995	0.939	2.88777e-211	3	ENSHGLG00000003139
1.06068e-213	0.422434	1	0.967	2.0853e-209	3	PLP2
1.52053e-211	0.84258	0.995	0.925	2.98936e-207	3	Calm3.1
5.29527e-211	0.349256	0.436	0.1	1.04105e-206	3	CKAP5
4.50192e-210	0.379912	0.473	0.117	8.85078e-206	3	ENSHGLG00000031856
8.88849e-210	0.363358	0.516	0.138	1.74748e-205	3	ENSHGLG00000016600
3.73064e-209	0.289672	0.372	0.073	7.33445e-205	3	NDC1
2.41479e-208	0.487906	0.992	0.911	4.74747e-204	3	ENSHGLG00000017042
3.77806e-207	0.492619	0.986	0.892	7.42767e-203	3	Atp5mc3
9.33732e-207	0.542575	0.84	0.432	1.83572e-202	3	ENSHGLG00000006568
1.80847e-206	0.289159	0.307	0.051	3.55545e-202	3	KIF2C
3.03694e-205	0.469277	0.62	0.215	5.97062e-201	3	RANGAP1
1.35285e-204	0.328184	0.43	0.1	2.6597e-200	3	RAD51
6.56175e-204	0.602368	0.583	0.195	1.29004e-199	3	TYMS
1.71139e-203	0.373124	0.419	0.097	3.36458e-199	3	ENSHGLG00000001806
6.27328e-202	0.517682	1	0.938	1.23333e-197	3	ENSHGLG00000013637
3.31319e-187	0.668845	0.868	0.544	6.51372e-183	3	ILF2
1.40324e-185	0.59167	0.959	0.738	2.75877e-181	3	HSP90B1
1.57016e-184	0.53752	0.945	0.689	3.08693e-180	3	ENSHGLG00000013718
6.24117e-184	0.924181	0.747	0.416	1.22701e-179	3	Pcna
7.5606e-184	0.54081	0.945	0.658	1.48641e-179	3	ENSHGLG00000013954
2.84933e-183	0.303896	0.439	0.111	5.60178e-179	3	DBF4
1.03406e-179	0.511783	0.563	0.2	2.03297e-175	3	GPSM2
3.19889e-179	0.522789	0.936	0.673	6.28901e-175	3	Dek
6.07987e-179	0.466472	0.728	0.324	1.1953e-174	3	ENSHGLG00000007950
2.95355e-176	0.488659	0.991	0.888	5.80668e-172	3	ENSHGLG00000006396
3.0024e-176	0.482178	0.754	0.349	5.90272e-172	3	ENSHGLG00000007730
3.66237e-176	0.3642	0.537	0.168	7.20023e-172	3	LRP11
1.29035e-175	0.49781	0.89	0.522	2.53683e-171	3	PHGDH
4.57842e-175	0.280554	0.382	0.09	9.00118e-171	3	SAP30
1.56745e-167	0.284113	0.406	0.102	3.08161e-163	3	CHEK1
5.52507e-165	0.548481	0.55	0.212	1.08623e-160	3	ENSHGLG00000009406
7.79104e-165	0.387165	0.995	0.954	1.53172e-160	3	ENSHGLG00000011974
2.41401e-163	0.559071	0.687	0.316	4.74594e-159	3	NRM
9.7846e-159	0.322685	0.5	0.161	1.92365e-154	3	TUBG1
8.74425e-158	0.411029	0.547	0.198	1.71912e-153	3	TCF19
5.8871e-156	0.365402	0.998	0.989	1.1574e-151	3	HSP90AA1
8.64634e-156	0.351119	0.48	0.153	1.69987e-151	3	GMNN
2.76697e-155	0.253979	0.258	0.047	5.43986e-151	3	CDC6
2.08081e-154	0.389215	0.636	0.251	4.09087e-150	3	ENSHGLG00000015836
5.3435e-154	0.43337	0.964	0.803	1.05053e-149	3	ENSHGLG00000016961
5.47118e-154	0.475915	0.865	0.546	1.07563e-149	3	MTCH2
2.27774e-153	0.43446	0.996	0.937	4.47803e-149	3	MGST3
6.09699e-153	0.346827	0.489	0.16	1.19867e-148	3	ENSHGLG00000016497
1.26751e-152	0.50765	0.842	0.495	2.49193e-148	3	NUDC
6.90849e-151	0.381584	0.982	0.895	1.35821e-146	3	PTGES3
1.47305e-150	0.363411	0.59	0.221	2.89601e-146	3	DNAJC9
9.84874e-149	0.371317	0.997	0.951	1.93626e-144	3	ENSHGLG00000007889
1.1855e-147	0.328588	0.475	0.154	2.33068e-143	3	BORCS5
2.81733e-145	0.383433	0.988	0.908	5.53887e-141	3	ATP5IF1
1.01786e-143	0.378475	0.649	0.278	2.00111e-139	3	ENSHGLG00000012052
3.99136e-140	0.344237	0.997	0.944	7.84702e-136	3	COX8A
7.71251e-135	0.439049	0.659	0.303	1.51628e-130	3	GINS2
2.87297e-133	0.35716	0.557	0.221	5.64825e-129	3	CDC25B
6.14993e-132	0.25044	0.411	0.122	1.20908e-127	3	PPP1R35
1.03577e-129	0.393296	0.997	0.946	2.03632e-125	3	GAPDH
2.30621e-129	0.387202	0.764	0.392	4.53402e-125	3	LSM3
6.90586e-129	0.423777	0.923	0.705	1.35769e-124	3	PGAM1
1.24707e-128	0.481507	0.868	0.616	2.45173e-124	3	SMC3
3.60353e-127	0.328442	0.522	0.201	7.08453e-123	3	RAB8A
6.77514e-127	0.363485	0.997	0.978	1.33199e-122	3	TXN
2.16153e-125	0.472458	0.805	0.501	4.24956e-121	3	ALYREF
4.19702e-124	0.327789	0.525	0.202	8.25134e-120	3	CDK2
9.53446e-123	0.313966	0.578	0.23	1.87448e-118	3	ENSHGLG00000016700
1.80433e-121	0.416784	0.826	0.517	3.54731e-117	3	DTYMK
1.89885e-121	0.380814	0.881	0.555	3.73315e-117	3	SNRPD1
1.17968e-120	0.358946	0.985	0.892	2.31924e-116	3	Calm1
5.23085e-120	0.326715	0.634	0.276	1.02838e-115	3	RPA2
3.66675e-118	0.401897	0.947	0.772	7.20882e-114	3	ENSHGLG00000002881
8.95434e-118	0.355035	0.975	0.847	1.76042e-113	3	ATP5F1A
5.80676e-117	0.372786	0.751	0.408	1.14161e-112	3	MRPL4
3.94045e-116	0.301983	0.538	0.218	7.74693e-112	3	AHCY
1.21044e-115	0.39476	0.886	0.603	2.37973e-111	3	MICOS10
4.83712e-115	0.310298	0.627	0.281	9.50978e-111	3	NUP37
1.51603e-114	0.386595	0.929	0.662	2.98051e-110	3	LSM7
2.51214e-114	0.373546	0.789	0.457	4.93887e-110	3	Ssrp1
5.51606e-114	0.338179	0.703	0.347	1.08446e-109	3	ENSHGLG00000000679
6.95415e-114	0.355547	0.997	0.981	1.36719e-109	3	LMNA
2.64142e-113	0.263293	0.488	0.18	5.19302e-109	3	PFKP
7.81927e-112	0.285853	0.548	0.216	1.53727e-107	3	PLTP
7.99198e-112	0.380356	0.964	0.853	1.57122e-107	3	HNRNPDL
7.66978e-111	0.287194	0.543	0.225	1.50788e-106	3	AIP
1.6539e-110	0.326883	0.433	0.159	3.25157e-106	3	TIMP3
3.11022e-110	0.395712	0.889	0.62	6.11469e-106	3	MDH1
7.24934e-110	0.341147	0.658	0.324	1.42522e-105	3	ASNA1
7.18678e-109	0.31443	0.6	0.274	1.41292e-104	3	PTPA
1.05612e-107	0.452107	0.75	0.404	2.07633e-103	3	NUCB2
2.74778e-106	0.42027	0.642	0.33	5.40214e-102	3	CDK2AP2
2.57967e-105	0.31355	0.977	0.872	5.07164e-101	3	ENSHGLG00000016241
2.19506e-102	0.28283	0.991	0.936	4.31549e-98	3	TMEM258
2.30573e-102	0.344131	0.929	0.684	4.53306e-98	3	ENSHGLG00000009108
3.76937e-101	0.286413	0.995	0.948	7.41058e-97	3	ENSHGLG00000010599
1.04635e-100	0.315215	0.669	0.329	2.05713e-96	3	ENSHGLG00000005735
5.11714e-100	0.326585	0.981	0.878	1.00603e-95	3	SOD1
1.14163e-99	0.252231	0.999	0.98	2.24444e-95	3	ENSHGLG00000012507
7.87089e-99	0.271403	0.524	0.222	1.54742e-94	3	ASH2L
3.00189e-97	0.396694	0.471	0.202	5.90172e-93	3	MCM5
1.85735e-96	0.389998	0.611	0.312	3.65154e-92	3	MCM7
2.95362e-95	0.369053	0.785	0.49	5.80681e-91	3	DAZAP1
2.43892e-93	0.404878	0.769	0.493	4.79492e-89	3	ENSHGLG00000002419
2.45314e-93	0.319296	0.749	0.429	4.82288e-89	3	KPNB1
1.96504e-92	0.32249	0.811	0.501	3.86327e-88	3	NUTF2
4.74256e-92	0.298718	0.631	0.311	9.32387e-88	3	RFC2
3.46649e-90	0.364887	0.846	0.595	6.81512e-86	3	ENSHGLG00000009428
1.82068e-89	0.323738	0.722	0.396	3.57946e-85	3	ENSHGLG00000013690
5.82088e-89	0.300566	0.689	0.37	1.14438e-84	3	GON7
2.50638e-88	0.290205	0.633	0.32	4.92754e-84	3	SNRPA1
4.09324e-88	0.28023	0.724	0.397	8.0473e-84	3	PPIH
1.83553e-87	0.305358	0.603	0.305	3.60866e-83	3	HPF1
5.55189e-87	0.2657	0.588	0.283	1.0915e-82	3	SMARCB1
2.21679e-85	0.269049	0.633	0.319	4.35821e-81	3	ENSHGLG00000005620
3.23247e-85	0.266206	0.444	0.183	6.35503e-81	3	MCM4
3.72153e-85	0.331021	0.964	0.833	7.31653e-81	3	ENSHGLG00000019595
4.06418e-85	0.308979	0.651	0.344	7.99017e-81	3	PRDX4
5.39037e-85	0.329649	0.876	0.631	1.05975e-80	3	MRPL51
6.8347e-85	0.320515	0.742	0.424	1.3437e-80	3	ENSHGLG00000005308
2.36229e-84	0.298304	0.645	0.342	4.64425e-80	3	ENSHGLG00000017580
8.15489e-84	0.309541	0.742	0.435	1.60325e-79	3	ENSHGLG00000004492
1.33392e-83	0.26882	0.632	0.314	2.62248e-79	3	ADK
3.826e-83	0.2835	0.693	0.366	7.52191e-79	3	PPA1
1.12335e-82	0.417795	0.908	0.67	2.2085e-78	3	ENSHGLG00000015816
1.33173e-82	0.316191	0.819	0.537	2.61818e-78	3	FKBP4
2.79074e-82	0.324593	0.912	0.712	5.48659e-78	3	ENSHGLG00000007927
5.66103e-81	0.28527	0.744	0.439	1.11296e-76	3	PHIP
1.44532e-80	0.312184	0.742	0.452	2.8415e-76	3	IMPDH2
3.17067e-80	0.337018	0.8	0.53	6.23353e-76	3	HAT1
1.17925e-79	0.318195	0.896	0.679	2.31841e-75	3	H2AFY
1.62108e-79	0.303451	0.632	0.339	3.18705e-75	3	ENSHGLG00000018291
5.28989e-78	0.317604	0.96	0.811	1.03999e-73	3	HMGA1
5.89681e-76	0.253093	0.545	0.26	1.15931e-71	3	ENSHGLG00000000755
8.58362e-76	0.261829	0.651	0.352	1.68754e-71	3	JPT2
1.08123e-75	0.284133	0.925	0.733	2.1257e-71	3	SNRPE
1.23234e-75	0.260563	0.628	0.328	2.42278e-71	3	ENSHGLG00000013708
1.41378e-75	0.29603	0.857	0.58	2.77949e-71	3	SDHB
1.50906e-75	0.277664	0.819	0.54	2.96681e-71	3	SNRPC
1.61089e-75	0.267617	0.982	0.914	3.16701e-71	3	COX5A
2.69252e-75	0.263327	0.659	0.349	5.29349e-71	3	ACAT2
2.86342e-75	0.282335	0.936	0.779	5.62948e-71	3	YWHAQ
6.10557e-75	0.294459	0.753	0.455	1.20035e-70	3	RPA3
4.27486e-74	0.294611	0.83	0.557	8.40438e-70	3	LSM2
1.3839e-72	0.279287	0.728	0.421	2.72075e-68	3	LRRC59
2.04054e-72	0.278284	0.71	0.406	4.0117e-68	3	ENSHGLG00000006959
5.69493e-72	0.370693	0.997	0.911	1.11962e-67	3	KRT5
2.17917e-71	0.330135	0.542	0.288	4.28425e-67	3	ENSHGLG00000009856
3.59428e-71	0.442785	0.962	0.845	7.06636e-67	3	MYL12B
5.73483e-71	0.277827	0.749	0.464	1.12747e-66	3	MTCH1
6.61149e-71	0.316465	0.792	0.501	1.29982e-66	3	HINT2
1.66576e-68	0.303436	0.687	0.405	3.27489e-64	3	HNRNPAB
1.80741e-68	0.313897	0.914	0.703	3.55336e-64	3	PARK7
2.5085e-68	0.297375	0.87	0.641	4.93172e-64	3	PSMB6
4.26472e-67	0.278723	0.818	0.555	8.38443e-63	3	PPA2
5.58327e-67	0.277324	0.919	0.742	1.09767e-62	3	ENSHGLG00000002885
1.59758e-66	0.255833	0.747	0.446	3.14085e-62	3	ENSHGLG00000014189
2.9921e-66	0.296876	0.806	0.567	5.88246e-62	3	RBBP7
3.66458e-66	0.274	0.771	0.483	7.20457e-62	3	ENSHGLG00000000122
1.81547e-65	0.292798	0.882	0.639	3.56922e-61	3	MLF2
2.81054e-65	0.265988	0.951	0.828	5.52551e-61	3	ENSHGLG00000009841
4.18436e-63	0.284294	0.881	0.697	8.22645e-59	3	P4HB
1.21649e-62	0.28921	0.811	0.557	2.39162e-58	3	ENSHGLG00000006872
3.809e-62	0.28055	0.943	0.788	7.48849e-58	3	EPCAM
1.4783e-61	0.271586	0.643	0.383	2.90634e-57	3	EZH2
4.51622e-61	0.252527	0.613	0.347	8.8789e-57	3	TFDP1
5.1954e-61	0.257282	0.842	0.6	1.02141e-56	3	ENSHGLG00000015947
1.79518e-59	0.259328	0.651	0.382	3.52932e-55	3	ENSHGLG00000010046
1.64181e-58	0.347366	0.974	0.871	3.22779e-54	3	GSTP1
6.36354e-58	0.255064	0.634	0.37	1.25107e-53	3	ORMDL2
6.67255e-58	0.312036	0.914	0.716	1.31182e-53	3	ENSHGLG00000002031
1.36881e-56	0.252725	0.777	0.519	2.69109e-52	3	ENSHGLG00000010879
1.25232e-55	0.286226	0.565	0.327	2.46205e-51	3	SUN2
2.61406e-53	0.252011	0.875	0.68	5.13924e-49	3	EWSR1
7.69925e-51	0.447496	0.871	0.637	1.51367e-46	3	KRT17
1.70105e-49	0.250252	0.846	0.651	3.34426e-45	3	GNB1
2.53197e-46	0.306917	0.651	0.42	4.97785e-42	3	ENSHGLG00000030156
4.68176e-46	0.254688	0.459	0.255	9.20434e-42	3	ENSHGLG00000011684
1.40092e-44	0.309388	0.981	0.821	2.7542e-40	3	KRT14
2.49736e-39	0.327544	0.679	0.465	4.90981e-35	3	ID1
0.000679367	0.458542	0.351	0.278	1	3	S100A9
1.50955e-201	0.388528	1	1	2.96777e-197	4	LGALS7	Sp2
3.04021e-201	0.532652	0.998	0.986	5.97705e-197	4	MT4
3.69685e-153	0.7498	0.968	0.696	7.268e-149	4	KRT10
6.57663e-150	0.447157	0.998	0.992	1.29297e-145	4	LY6D
2.46682e-134	0.392089	1	0.993	4.84976e-130	4	S100A14
9.6113e-121	0.425663	0.995	0.966	1.88958e-116	4	AQP3
3.59341e-93	0.441612	0.893	0.797	7.06465e-89	4	SH3BGRL3
2.08168e-92	0.516449	0.985	0.984	4.09258e-88	4	ENSHGLG00000000004
8.65701e-81	0.271928	1	0.998	1.70197e-76	4	KRTDAP
1.08201e-75	0.430469	0.739	0.517	2.12723e-71	4	ENDOU
2.32464e-70	0.32315	0.98	0.968	4.57025e-66	4	THEM5
9.71564e-67	0.280741	0.974	0.948	1.91009e-62	4	S100A16
1.20451e-66	0.41604	0.801	0.568	2.36806e-62	4	SLURP1
1.74905e-59	0.319286	0.932	0.876	3.43864e-55	4	RAB25
4.76512e-50	0.424813	0.915	0.897	9.36823e-46	4	ENSHGLG00000000002
2.42094e-45	0.304138	0.752	0.526	4.75958e-41	4	KRT1
1.77795e-38	0.262261	0.955	0.942	3.49545e-34	4	MGST3
2.79335e-33	0.340918	0.413	0.271	5.49172e-29	4	MAB21L4
2.85948e-33	0.346284	0.594	0.507	5.62174e-29	4	ENSHGLG00000016672
3.98748e-33	0.336851	0.584	0.418	7.83939e-29	4	PDZK1IP1
3.99359e-33	0.26588	0.905	0.89	7.85139e-29	4	ENSHGLG00000014166
5.84178e-31	0.276371	0.743	0.632	1.14849e-26	4	CTNNBIP1
4.80621e-30	0.267771	0.828	0.828	9.44901e-26	4	MGST1
2.01892e-26	0.266752	0.371	0.25	3.96921e-22	4	DSG1
1.83901e-24	0.308485	0.811	0.747	3.6155e-20	4	ENSHGLG00000004445
9.34502e-22	0.313765	0.811	0.76	1.83723e-17	4	HES1
3.35675e-21	0.254895	0.751	0.758	6.59937e-17	4	ND5
3.41569e-20	0.253233	0.649	0.629	6.71525e-16	4	ENSHGLG00000014847
5.67804e-15	0.25112	0.531	0.486	1.1163e-10	4	ENSHGLG00000021023
0	1.81976	0.981	0.383	0	5	CLIC3	Gr2
0	1.78365	0.959	0.338	0	5	CNFN
0	1.74809	0.997	0.393	0	5	SPINK5
0	1.69426	0.879	0.151	0	5	LY6G6C
0	1.58652	0.987	0.691	0	5	ENSHGLG00000017088
0	1.50692	0.88	0.16	0	5	ENSHGLG00000002786
0	1.39408	0.995	0.643	0	5	LYPD3
0	1.33739	0.942	0.295	0	5	DGAT2
0	1.29978	0.972	0.382	0	5	SBSN
0	1.29363	0.992	0.858	0	5	DAPL1
0	1.29162	0.918	0.427	0	5	SULT2B1
0	1.26133	0.921	0.236	0	5	ENSHGLG00000006883
0	1.24455	0.962	0.443	0	5	RGCC
0	1.16997	1	0.998	0	5	KRTDAP
0	1.16104	0.997	0.98	0	5	HOPX
0	1.13854	0.92	0.478	0	5	LGALSL
0	1.12446	0.914	0.24	0	5	GRHL1
0	1.08864	1	0.995	0	5	ENSHGLG00000007309
0	1.06867	0.929	0.383	0	5	SDR16C5
0	1.04512	1	0.998	0	5	ENSHGLG00000017932
0	1.02397	0.973	0.551	0	5	SLURP1
0	1.01997	0.896	0.33	0	5	ITPRID2
0	0.991138	0.966	0.572	0	5	SH3YL1
0	0.983491	0.925	0.343	0	5	ELOVL4
0	0.968141	0.978	0.629	0	5	ENSHGLG00000014707
0	0.957835	0.961	0.42	0	5	ENSHGLG00000004768
0	0.957755	0.879	0.277	0	5	POF1B
0	0.937375	0.951	0.61	0	5	CTNNBIP1
0	0.926478	0.921	0.254	0	5	ENSHGLG00000014982
0	0.925121	0.962	0.551	0	5	ENSHGLG00000013426
0	0.889177	0.794	0.174	0	5	RBP2
0	0.876315	0.893	0.41	0	5	Ndrg2
0	0.869525	0.804	0.245	0	5	EVPL
0	0.856034	0.8	0.227	0	5	MBOAT2
0	0.853007	0.761	0.134	0	5	ENSHGLG00000000866
0	0.84017	0.859	0.316	0	5	ENSHGLG00000010028
0	0.820231	0.991	0.938	0	5	SERPINB5
0	0.820058	0.997	0.986	0	5	DSP
0	0.797328	0.641	0.083	0	5	ATP6V1C2
0	0.774494	0.999	0.993	0	5	HSPB1
0	0.769461	0.666	0.162	0	5	ENSHGLG00000015598
0	0.740521	0.81	0.239	0	5	NECTIN4
0	0.732081	0.642	0.076	0	5	TESC
0	0.708577	0.751	0.217	0	5	DBNDD2
0	0.679592	0.524	0.062	0	5	IL36RN
0	0.668268	0.773	0.209	0	5	BPIFC
0	0.664089	0.661	0.141	0	5	LIN7B
0	0.659503	0.658	0.125	0	5	SNTB1
0	0.641955	0.761	0.179	0	5	LYNX1-SLURP2
0	0.633461	0.646	0.111	0	5	TGM1
0	0.62002	0.556	0.059	0	5	SUSD2
0	0.586998	0.628	0.137	0	5	SEMA4A
0	0.57161	0.527	0.085	0	5	FAM89A
0	0.569299	0.521	0.052	0	5	MAP2
0	0.54985	0.508	0.043	0	5	PON3
0	0.548941	0.576	0.107	0	5	N4BP3
0	0.543619	0.4	0.042	0	5	MZB1
0	0.526158	0.471	0.041	0	5	SLC6A19
0	0.483315	0.519	0.083	0	5	PAQR5
0	0.477423	0.507	0.071	0	5	ALOX12B
0	0.398015	0.39	0.036	0	5	ENSHGLG00000025832
0	0.299688	0.332	0.031	0	5	ALOX12
1.57446e-305	0.352686	0.401	0.051	3.09538e-301	5	AADACL2
9.92449e-305	0.664805	0.698	0.189	1.95116e-300	5	ZNRF1
5.87802e-304	0.754097	0.989	0.87	1.15562e-299	5	RAB25
1.01481e-301	0.721412	0.742	0.217	1.99511e-297	5	SPTBN2
2.47501e-298	0.86821	0.993	0.878	4.86587e-294	5	PKP1
2.0233e-297	0.919514	0.941	0.592	3.9778e-293	5	MSMO1
2.26032e-296	0.51795	0.568	0.115	4.44379e-292	5	CDKN2B
5.76512e-293	0.826064	0.988	0.967	1.13342e-288	5	THEM5
9.8765e-293	0.662642	1	0.976	1.94172e-288	5	DYNLL1
1.99336e-292	0.695958	0.773	0.252	3.91895e-288	5	ENSHGLG00000007976
4.63842e-289	0.779713	0.869	0.393	9.11914e-285	5	CCDC12
1.60001e-288	0.43214	0.594	0.125	3.14561e-284	5	GDPD3
4.67152e-287	0.86164	0.875	0.429	9.1842e-283	5	MAL2
1.03251e-286	0.818525	0.932	0.526	2.02991e-282	5	MYCBP2
1.41413e-286	0.454096	0.507	0.093	2.78017e-282	5	ENSHGLG00000014386
3.36869e-286	0.280042	0.305	0.029	6.62285e-282	5	MSRB3
5.81815e-286	0.797063	0.978	0.782	1.14385e-281	5	GLTP
1.09367e-284	0.718477	0.733	0.229	2.15016e-280	5	EMB
6.1322e-283	0.37151	0.533	0.101	1.20559e-278	5	KRT80
1.35207e-279	0.722861	0.768	0.254	2.65818e-275	5	SPTSSB
7.17314e-277	0.979214	0.962	0.789	1.41024e-272	5	TUBA4A
2.87086e-275	0.670388	0.987	0.912	5.6441e-271	5	CLTB
2.83141e-274	0.507986	0.605	0.14	5.56655e-270	5	BICDL2
5.58134e-273	0.887153	0.948	0.506	1.09729e-268	5	KRT1
6.20224e-271	0.673766	0.728	0.231	1.21936e-266	5	DNAJB2
3.44059e-266	0.271188	0.311	0.033	6.76421e-262	5	GPLD1
1.00817e-265	0.369999	0.441	0.074	1.98206e-261	5	SLC39A2
6.66852e-264	0.482748	0.586	0.137	1.31103e-259	5	ANXA9
1.7419e-262	0.461372	0.425	0.071	3.42457e-258	5	ENSHGLG00000025925
4.06737e-259	0.600409	0.693	0.202	7.99644e-255	5	SPTAN1
7.15821e-259	0.754955	0.944	0.66	1.4073e-254	5	BNIPL
6.47631e-258	0.418542	0.284	0.028	1.27324e-253	5	TNNT2
4.14067e-256	0.769509	0.912	0.526	8.14055e-252	5	CERS2
5.25063e-256	0.739004	0.881	0.386	1.03227e-251	5	PDZK1IP1
2.09713e-254	0.736059	0.936	0.559	4.12296e-250	5	SERINC2
3.64237e-252	0.831419	0.887	0.523	7.1609e-248	5	MAP1LC3A
1.03888e-251	0.644482	0.963	0.836	2.04243e-247	5	ZNF706
1.242e-247	0.396118	0.795	0.312	2.44178e-243	5	CSTA
1.11368e-246	0.460881	0.515	0.111	2.18949e-242	5	ENSHGLG00000011542
1.12311e-245	0.537754	0.999	0.993	2.20803e-241	5	S100A14
2.80717e-244	0.924388	0.997	0.693	5.51889e-240	5	KRT10
8.74283e-242	0.719951	0.939	0.752	1.71884e-237	5	OSTF1
5.89862e-241	0.380891	0.454	0.087	1.15967e-236	5	TMEM164
5.19602e-238	0.581857	0.737	0.237	1.02154e-233	5	MAB21L4
6.22952e-237	0.590653	0.71	0.233	1.22472e-232	5	ENSHGLG00000010544
1.08535e-235	0.722587	0.841	0.401	2.13379e-231	5	NUCB2
2.87213e-234	0.460228	1	0.997	5.64661e-230	5	ENSHGLG00000013614
2.03341e-232	0.722746	0.897	0.503	3.99769e-228	5	PIM3
2.99119e-230	0.589295	0.984	0.947	5.88069e-226	5	S100A16
8.38354e-226	0.338744	0.38	0.064	1.6482e-221	5	PARP6
2.8343e-225	0.291619	0.325	0.046	5.57223e-221	5	ENSHGLG00000009194
1.14756e-224	0.628439	0.858	0.402	2.2561e-220	5	ENSHGLG00000010822
6.49204e-221	0.33222	0.375	0.064	1.27634e-216	5	ENSHGLG00000001850
1.62592e-219	0.576104	0.967	0.84	3.19656e-215	5	NDUFC1
7.50236e-219	0.497065	0.603	0.169	1.47496e-214	5	LY6G6D
8.40129e-219	0.480624	0.595	0.165	1.65169e-214	5	ANKRD35
1.30186e-218	0.482082	0.63	0.183	2.55945e-214	5	EPS8L1
4.11881e-217	0.643327	0.949	0.738	8.09758e-213	5	ENSHGLG00000005396
2.52469e-216	0.442223	0.57	0.154	4.96353e-212	5	KCNK7
1.39646e-213	0.561596	0.675	0.228	2.74544e-209	5	GNG12
4.62731e-213	0.674048	0.83	0.417	9.0973e-209	5	USP5
8.69924e-213	0.552429	0.679	0.22	1.71027e-208	5	ENSHGLG00000000385
5.39973e-212	0.46903	0.59	0.167	1.06159e-207	5	ENSHGLG00000004047
3.20153e-207	0.523813	0.982	0.936	6.29421e-203	5	SEC61G
3.46362e-206	0.536741	0.675	0.232	6.80947e-202	5	ACLY
8.10746e-206	0.393342	0.444	0.098	1.59393e-201	5	PLEKHA5
2.3882e-205	0.282936	0.322	0.049	4.6952e-201	5	PLEKHG1
6.96815e-205	0.394122	0.484	0.113	1.36994e-200	5	DSC1
8.63102e-205	0.476522	0.43	0.092	1.69686e-200	5	IPO13
6.85564e-204	0.488371	0.538	0.139	1.34782e-199	5	GP1BB
5.09077e-202	0.654634	0.933	0.823	1.00085e-197	5	ENSHGLG00000016632
3.63682e-201	0.359938	0.453	0.101	7.14999e-197	5	AACS
1.54538e-200	0.672929	0.835	0.419	3.03821e-196	5	ENSHGLG00000031826
1.27124e-199	0.258818	0.276	0.037	2.49925e-195	5	ICA1
3.27463e-198	0.369855	0.45	0.102	6.43793e-194	5	UBTD1
3.7849e-198	0.625612	0.745	0.318	7.44111e-194	5	FDFT1
1.42081e-197	0.478007	0.597	0.18	2.79332e-193	5	FAM20B
2.75429e-194	0.628007	0.933	0.721	5.41493e-190	5	RORA
3.1567e-194	0.652416	0.816	0.421	6.20608e-190	5	ENSHGLG00000007755
4.12017e-194	0.593386	0.752	0.311	8.10025e-190	5	EPHX3
5.78783e-194	0.617762	0.95	0.762	1.13789e-189	5	PTN
3.16886e-193	0.511391	0.618	0.196	6.22999e-189	5	CRABP2
8.43915e-193	0.584896	0.762	0.317	1.65914e-188	5	ACSL1
8.12869e-189	0.610853	0.854	0.478	1.5981e-184	5	UGT1A6
1.55859e-188	0.346069	0.389	0.079	3.06419e-184	5	ENSHGLG00000016610
7.21167e-186	0.608149	0.891	0.646	1.41781e-181	5	ENSHGLG00000018607
1.11861e-185	0.373303	0.48	0.123	2.19919e-181	5	ENSHGLG00000008972
1.83908e-185	0.647773	0.796	0.398	3.61564e-181	5	TMEM45A
1.20394e-184	0.385364	0.442	0.105	2.36694e-180	5	PEA15
7.71353e-184	0.470386	0.97	0.945	1.51648e-179	5	ATOX1
9.28483e-184	0.656566	0.82	0.425	1.8254e-179	5	LMO4
2.57666e-183	0.601228	0.806	0.398	5.06571e-179	5	KLC3
1.52119e-182	0.312253	0.399	0.086	2.99066e-178	5	GGT6
1.39373e-181	0.545913	0.946	0.863	2.74008e-177	5	H2AFJ
5.04432e-180	0.309997	0.424	0.097	9.91714e-176	5	ACE2
1.2752e-177	0.554648	0.732	0.303	2.50703e-173	5	MPP7
1.91707e-177	0.668821	0.852	0.543	3.76896e-173	5	PON2
2.85517e-177	0.257996	0.344	0.066	5.61327e-173	5	ACOT7
3.08005e-177	0.273738	0.34	0.064	6.05537e-173	5	CCDC85C
4.78743e-176	0.562676	0.953	0.879	9.41209e-172	5	ENSHGLG00000017824
2.15986e-175	0.490144	0.639	0.221	4.24629e-171	5	DSG1
4.28044e-174	0.438001	0.607	0.201	8.41534e-170	5	SHLD2
1.45874e-171	0.505417	0.768	0.35	2.86788e-167	5	ID4
2.04353e-171	0.325725	0.526	0.15	4.01759e-167	5	TREX2
5.42761e-170	0.399956	0.565	0.174	1.06707e-165	5	ADGRG1
1.23954e-169	0.543655	0.59	0.201	2.43694e-165	5	EGR3
7.95845e-169	0.283756	0.354	0.072	1.56463e-164	5	PLA2G4E
1.48974e-166	0.657442	0.905	0.626	2.92884e-162	5	GATA3
3.37948e-162	0.379154	0.515	0.154	6.64406e-158	5	ASB13
4.45657e-162	0.393533	0.558	0.179	8.76161e-158	5	NOTCH2
4.98569e-162	0.545026	0.94	0.524	9.80186e-158	5	RHOV
1.0397e-161	0.513232	0.938	0.8	2.04405e-157	5	ENSHGLG00000005289
1.55513e-161	0.31954	0.437	0.112	3.05738e-157	5	GAREM1
1.59549e-161	0.26882	0.36	0.078	3.13673e-157	5	MIXL1
7.93245e-161	0.5578	0.935	0.683	1.55952e-156	5	EMP2
8.69542e-160	0.447926	0.631	0.233	1.70952e-155	5	ENSHGLG00000009399
1.47895e-158	0.528324	0.806	0.416	2.90761e-154	5	ATP6AP1
7.02187e-158	0.688952	0.976	0.928	1.3805e-153	5	Calm3.1
8.45071e-158	0.551581	0.698	0.296	1.66141e-153	5	PROM2
3.10056e-157	0.254783	0.369	0.083	6.0957e-153	5	PLA2G16
2.15618e-154	0.345361	0.449	0.121	4.23905e-150	5	EGLN3
2.83327e-154	0.357472	0.459	0.129	5.5702e-150	5	TANC1
8.08191e-154	0.433198	0.546	0.18	1.5889e-149	5	ENSHGLG00000008062
5.53778e-153	0.466021	0.958	0.847	1.08873e-148	5	NOP10
2.70679e-151	0.338711	0.465	0.132	5.32155e-147	5	ETV6
4.78823e-151	0.408057	0.597	0.211	9.41367e-147	5	DHCR7
3.98692e-150	0.482215	0.845	0.503	7.83828e-146	5	TMEM40
5.19389e-150	0.516051	0.754	0.376	1.02112e-145	5	TMEM54
9.95956e-150	0.36506	0.509	0.156	1.95805e-145	5	KLK8
1.2224e-148	0.453376	0.655	0.257	2.40325e-144	5	PCBP4
8.52084e-148	0.290003	0.381	0.092	1.6752e-143	5	APPL2
5.4102e-147	0.49431	0.963	0.823	1.06364e-142	5	JUP
1.3675e-146	0.508943	0.934	0.744	2.6885e-142	5	ENSHGLG00000007806
2.40862e-146	0.421227	0.626	0.242	4.73534e-142	5	ENSHGLG00000018813
5.02467e-146	0.514097	0.765	0.377	9.8785e-142	5	RAB38
1.25442e-144	0.302434	0.359	0.086	2.4662e-140	5	NGEF
3.05794e-143	0.440139	0.664	0.266	6.01191e-139	5	CYB561
3.10305e-143	0.451321	0.654	0.274	6.10059e-139	5	TMEM254
1.36358e-142	0.320963	0.442	0.126	2.68079e-138	5	ABHD6
3.26426e-142	0.369597	0.557	0.19	6.41753e-138	5	HMGCR
4.05855e-142	0.576391	0.765	0.391	7.97911e-138	5	ENSHGLG00000015416
6.35361e-142	0.512931	0.704	0.317	1.24912e-137	5	OVOL1
3.44893e-141	0.435121	0.635	0.251	6.7806e-137	5	TIAM1
3.91359e-140	0.463842	0.721	0.324	7.69411e-136	5	ACP5
9.95332e-140	0.501268	0.926	0.749	1.95682e-135	5	XBP1
1.88234e-139	0.383488	0.99	0.967	3.70068e-135	5	EIF3L
2.16785e-139	0.558206	0.996	0.957	4.26199e-135	5	HOMER2
5.39458e-139	0.480664	0.612	0.233	1.06057e-134	5	PLXNB2
1.48485e-138	0.527029	0.852	0.543	2.91921e-134	5	ENSHGLG00000004558
8.9027e-138	1.01168	0.775	0.408	1.75027e-133	5	SERPINB2
1.47996e-137	0.482371	0.773	0.393	2.9096e-133	5	CWH43
2.97133e-137	0.324005	0.444	0.131	5.84164e-133	5	ATP6V0A1
1.75777e-136	0.343789	0.471	0.146	3.45577e-132	5	RPS6KB2
4.16476e-135	0.318822	0.43	0.127	8.18792e-131	5	MACROD1
5.16866e-135	0.433165	0.642	0.255	1.01616e-130	5	ADAM15
7.01686e-135	0.353095	0.509	0.166	1.37951e-130	5	TTC22
2.79159e-134	0.49148	0.746	0.384	5.48826e-130	5	CLINT1
5.88013e-133	0.496798	0.89	0.662	1.15603e-128	5	ENSHGLG00000011657
3.15922e-132	0.522091	0.583	0.232	6.21102e-128	5	HMGCS1
4.85694e-132	0.408564	0.544	0.191	9.54874e-128	5	ARHGEF10L
5.75232e-132	0.420326	0.627	0.26	1.13091e-127	5	GGH
3.05038e-131	0.613067	0.503	0.183	5.99706e-127	5	CITED2
2.3341e-129	0.27421	0.398	0.112	4.58884e-125	5	RNF40
6.32588e-129	0.428884	0.953	0.844	1.24367e-124	5	ENSHGLG00000015490
2.73207e-128	0.319173	0.483	0.157	5.37125e-124	5	PLPP2
4.90544e-128	0.402742	0.96	0.899	9.64409e-124	5	UBL5
3.07106e-127	0.259245	0.32	0.076	6.0377e-123	5	CAMSAP3
9.23182e-127	0.283459	0.432	0.13	1.81498e-122	5	ENSHGLG00000018848
2.26076e-126	0.451632	0.692	0.314	4.44466e-122	5	LPCAT2
2.33218e-126	0.381938	0.569	0.218	4.58507e-122	5	ENSHGLG00000016170
4.34726e-126	0.424736	0.629	0.259	8.54671e-122	5	VPS37C
6.14127e-126	0.422083	0.956	0.896	1.20737e-121	5	RBX1
8.4134e-126	0.26866	0.366	0.099	1.65408e-121	5	ENSHGLG00000028562
1.12432e-125	0.460145	0.622	0.256	2.21042e-121	5	KIF1C
1.11567e-124	0.290099	0.383	0.107	2.1934e-120	5	QSOX2
3.21007e-124	0.462652	0.715	0.362	6.311e-120	5	ENSHGLG00000016273
4.44744e-124	0.434312	0.606	0.252	8.74368e-120	5	ATP2B4
5.37195e-124	0.550976	0.812	0.498	1.05613e-119	5	GJB5
5.37987e-124	0.278562	0.381	0.106	1.05768e-119	5	SPTLC3
1.07505e-123	0.313103	0.413	0.121	2.11354e-119	5	GSE1
4.86701e-123	0.467216	0.898	0.759	9.56854e-119	5	ENSHGLG00000017246
1.10041e-122	0.257795	0.364	0.098	2.1634e-118	5	TMEM125
5.95945e-122	0.341998	0.976	0.97	1.17163e-117	5	ENSHGLG00000013545
3.21182e-121	0.505347	0.919	0.821	6.31443e-117	5	PRDX2
4.45976e-121	0.291411	0.527	0.192	8.76789e-117	5	RNF39
5.4603e-121	0.400397	0.655	0.292	1.0735e-116	5	TSTD1
2.2354e-120	0.455492	0.85	0.505	4.3948e-116	5	ENDOU
2.97535e-120	0.470122	0.672	0.301	5.84954e-116	5	Aox4
6.32376e-120	0.332296	0.529	0.193	1.24325e-115	5	MAP4K1
1.35717e-119	0.274795	0.39	0.113	2.6682e-115	5	ENSHGLG00000016656
1.47231e-119	0.457438	0.879	0.59	2.89456e-115	5	CLDN1
5.48846e-118	0.290779	0.446	0.143	1.07903e-113	5	IL22RA1
1.24718e-117	0.297687	0.461	0.152	2.45195e-113	5	ENSHGLG00000014876
2.6224e-117	0.411361	0.676	0.311	5.15564e-113	5	FAM210B
2.74873e-117	0.304261	0.456	0.149	5.404e-113	5	ELOVL7
4.01801e-117	0.346869	0.54	0.203	7.89941e-113	5	LMO7
7.43853e-117	0.335432	0.535	0.199	1.46242e-112	5	ENSHGLG00000011374
8.11254e-116	0.381329	0.558	0.218	1.59493e-111	5	ENSHGLG00000025915
2.57939e-115	0.310016	0.449	0.147	5.07108e-111	5	GNG13
3.30443e-115	0.383571	0.591	0.251	6.4965e-111	5	DPP3
3.32515e-115	0.297083	0.44	0.144	6.53725e-111	5	GAB1
4.1755e-115	0.461514	0.87	0.682	8.20903e-111	5	ENSHGLG00000015530
1.03318e-112	0.364085	0.606	0.258	2.03123e-108	5	ENSHGLG00000001574
1.03794e-112	0.46857	0.849	0.631	2.04059e-108	5	HADH
5.66231e-112	0.477116	0.957	0.892	1.11321e-107	5	GSN
7.01328e-112	0.386786	0.6	0.251	1.37881e-107	5	ENSHGLG00000018824
8.71787e-111	0.466642	0.811	0.492	1.71393e-106	5	NCKAP1
1.59244e-109	0.434831	0.831	0.561	3.13075e-105	5	LAMTOR2
1.96632e-109	0.330999	0.529	0.203	3.86578e-105	5	NIPAL1
2.66127e-108	0.362371	0.958	0.922	5.23207e-104	5	VAMP8
5.68884e-108	0.305178	0.497	0.184	1.11843e-103	5	PMM1
2.40237e-107	0.417052	0.676	0.337	4.72306e-103	5	TMEM134
4.96234e-106	0.330817	0.97	0.967	9.75596e-102	5	NDUFA4
1.23374e-104	0.277139	0.49	0.18	2.42553e-100	5	ENSHGLG00000030674
5.40413e-103	0.25925	0.366	0.112	1.06245e-98	5	ST14
9.30967e-103	0.267817	0.363	0.111	1.83028e-98	5	PRKCD
7.44139e-102	0.428848	0.723	0.397	1.46298e-97	5	ENSHGLG00000013122
1.43241e-101	0.391985	0.63	0.303	2.81612e-97	5	Srpk1
2.33026e-101	0.30602	0.543	0.217	4.58129e-97	5	ENSHGLG00000013533
2.89494e-101	0.385152	0.697	0.356	5.69145e-97	5	DHRS7
4.10023e-99	0.404778	0.553	0.238	8.06105e-95	5	TXNDC5
4.40224e-99	0.316852	0.487	0.185	8.6548e-95	5	PHYHIP
6.12659e-99	0.431794	0.782	0.492	1.20449e-94	5	PLD3
6.74522e-99	0.334088	0.588	0.257	1.32611e-94	5	CLCN3
1.51704e-98	0.280024	0.454	0.165	2.9825e-94	5	FDPS
4.58134e-98	0.377551	0.673	0.335	9.00692e-94	5	C7orf57
1.03751e-97	0.288096	0.394	0.131	2.03974e-93	5	SGSM2
2.42432e-97	0.553908	0.617	0.318	4.76621e-93	5	CCHCR1
2.56412e-97	0.316529	0.981	0.964	5.04106e-93	5	COX7A2
1.5086e-96	0.425281	0.798	0.554	2.9659e-92	5	DCTN3
5.31863e-96	0.320016	0.568	0.246	1.04564e-91	5	SYNGR1
2.67107e-95	0.320685	0.442	0.159	5.25132e-91	5	ZNF652
7.65543e-95	0.321262	0.497	0.197	1.50506e-90	5	FAM219B
1.05384e-94	0.422887	0.824	0.585	2.07185e-90	5	PAFAH1B3
1.25188e-94	0.304296	0.5	0.197	2.46121e-90	5	CKM
2.124e-94	0.38892	0.87	0.707	4.17578e-90	5	ATP6V0E1
4.18836e-94	0.389067	0.661	0.336	8.23432e-90	5	SPTBN1
5.9577e-94	0.382579	0.621	0.294	1.17128e-89	5	MACF1
7.14103e-94	0.289474	0.489	0.189	1.40393e-89	5	IL17RC
4.26139e-93	0.4316	0.783	0.488	8.37789e-89	5	TPRG1
1.71648e-92	0.317935	0.544	0.235	3.37459e-88	5	ENSHGLG00000013421
2.79495e-92	0.390126	0.914	0.861	5.49488e-88	5	SLC25A5
5.56285e-92	0.269708	0.537	0.221	1.09366e-87	5	SLC46A1
8.38894e-92	0.428756	0.704	0.386	1.64927e-87	5	ERBB2
9.91915e-92	0.462315	0.671	0.373	1.95011e-87	5	ENSHGLG00000029931
3.73612e-91	0.373398	0.597	0.287	7.34521e-87	5	ENSHGLG00000000389
9.88864e-91	0.255968	0.378	0.128	1.94411e-86	5	GATAD2A
2.62881e-90	0.314131	0.527	0.221	5.16824e-86	5	THOP1
1.43647e-89	0.409897	0.837	0.659	2.82411e-85	5	HEBP2
3.62011e-89	0.292757	0.532	0.223	7.11713e-85	5	RHBG
9.1015e-89	0.391022	0.724	0.398	1.78935e-84	5	DOK4
2.34272e-88	0.298078	0.506	0.209	4.60579e-84	5	PNKP
5.16196e-88	0.348161	0.584	0.267	1.01484e-83	5	USP7
5.40427e-88	0.41725	0.723	0.433	1.06248e-83	5	GPR87
1.36067e-87	0.365837	0.661	0.335	2.67509e-83	5	ENSHGLG00000006128
5.26211e-87	0.284776	0.516	0.215	1.03453e-82	5	PLPP1
2.8442e-86	0.373366	0.948	0.853	5.59169e-82	5	PET100
4.59624e-86	0.330601	0.617	0.3	9.0362e-82	5	ALKBH7
7.71579e-86	0.307946	0.424	0.161	1.51692e-81	5	SBF1
1.51459e-85	0.370636	0.686	0.364	2.97768e-81	5	DAAM1
1.55341e-85	0.381135	0.884	0.738	3.05401e-81	5	POLR2K
8.58498e-85	0.31998	0.521	0.224	1.68781e-80	5	RMND5A
9.07667e-85	0.396169	0.664	0.347	1.78447e-80	5	EFS
5.2267e-84	0.574508	0.991	0.983	1.02757e-79	5	ENSHGLG00000000004
2.78328e-83	0.353293	0.586	0.275	5.47193e-79	5	HR
6.4613e-83	0.624491	0.634	0.36	1.27029e-78	5	ENSHGLG00000015163
8.66563e-83	0.271554	0.441	0.172	1.70366e-78	5	MDFIC
1.03839e-82	0.394849	0.725	0.425	2.04147e-78	5	BICD2
2.30954e-82	0.285209	0.541	0.235	4.54055e-78	5	ENSHGLG00000011561
4.34562e-82	0.302407	0.993	0.978	8.5435e-78	5	ENSHGLG00000031083
4.83563e-82	0.366513	0.708	0.404	9.50686e-78	5	RHOD
8.01816e-82	0.318794	0.576	0.275	1.57637e-77	5	ENSHGLG00000003324
1.20315e-81	0.370546	0.788	0.537	2.3654e-77	5	ENSHGLG00000019260
1.12414e-80	0.567741	0.296	0.096	2.21005e-76	5	SLPI
1.44902e-80	0.298246	0.957	0.9	2.84877e-76	5	COX6C
1.61477e-80	0.311167	0.968	0.911	3.17465e-76	5	ATP5IF1
3.38935e-80	0.264107	0.464	0.189	6.66346e-76	5	TSC22D4
4.71523e-80	0.38416	0.93	0.776	9.27014e-76	5	PKP3
3.68572e-79	0.338696	0.915	0.769	7.24612e-75	5	EDF1
4.48127e-79	0.344928	0.728	0.428	8.81017e-75	5	ARPC5L
2.89898e-78	0.303305	0.513	0.227	5.6994e-74	5	RASGRP1
3.4472e-78	0.37637	0.768	0.48	6.7772e-74	5	PSMD3
4.16596e-77	0.316467	0.591	0.293	8.19028e-73	5	MANBAL
5.85634e-77	0.352719	0.897	0.728	1.15136e-72	5	ENSHGLG00000014730
6.28226e-77	0.348491	0.689	0.388	1.23509e-72	5	MKKS
1.88347e-76	0.276208	0.965	0.945	3.7029e-72	5	ENSHGLG00000004572
2.35838e-76	0.359458	0.784	0.547	4.63657e-72	5	ENSHGLG00000002491
2.54461e-76	0.346548	0.826	0.616	5.00271e-72	5	APOPT1
5.96127e-76	0.366633	0.766	0.481	1.17199e-71	5	SPPL3
6.42804e-76	0.343001	0.926	0.877	1.26375e-71	5	TPI1
6.72385e-76	0.318505	0.667	0.361	1.32191e-71	5	RDH12
1.65007e-75	0.35687	0.823	0.605	3.24403e-71	5	MRPS21
5.84533e-75	0.250483	0.509	0.221	1.14919e-70	5	ANKH
8.60307e-75	0.364937	0.774	0.504	1.69136e-70	5	ZNF771
1.0637e-74	0.305531	0.607	0.306	2.09124e-70	5	ERBB3
1.57296e-74	0.308098	0.973	0.895	3.09244e-70	5	Calm1
2.00847e-74	0.26061	0.436	0.175	3.94865e-70	5	ENSHGLG00000003379
3.67111e-74	0.250336	0.405	0.158	7.2174e-70	5	ENSHGLG00000004481
5.46336e-74	0.295962	0.998	0.994	1.0741e-69	5	S100A11
1.21204e-73	0.32688	0.67	0.373	2.38286e-69	5	ENSHGLG00000019309
1.70444e-73	0.261216	0.407	0.16	3.35093e-69	5	EPB41L4B
1.34919e-72	0.342268	0.654	0.361	2.65251e-68	5	SLC9A3R1
7.25115e-72	0.398897	0.809	0.571	1.42558e-67	5	CDKN1A
8.24205e-72	0.266654	0.506	0.226	1.62039e-67	5	DAPP1
1.74908e-71	0.373174	0.752	0.469	3.43868e-67	5	ENSHGLG00000011783
2.15246e-71	0.32733	0.689	0.39	4.23174e-67	5	ENSHGLG00000004266
3.07545e-71	0.324052	0.926	0.841	6.04633e-67	5	ENSHGLG00000018736
2.60984e-69	0.378568	0.688	0.394	5.13094e-65	5	Rxra
2.83905e-69	0.260229	0.541	0.255	5.58158e-65	5	MARCH2
1.9435e-68	0.345268	0.723	0.439	3.82092e-64	5	TDP2
2.6748e-68	0.260347	0.502	0.228	5.25866e-64	5	CMIP
6.6944e-68	0.262999	0.973	0.959	1.31612e-63	5	ENSHGLG00000016352
8.71032e-68	0.272242	0.546	0.26	1.71245e-63	5	ENSHGLG00000017744
2.0604e-67	0.374702	0.98	0.941	4.05075e-63	5	ENSHGLG00000014845
4.17899e-67	0.316722	0.676	0.378	8.2159e-63	5	NIPAL2
4.25007e-67	0.309146	0.66	0.366	8.35563e-63	5	TMEM9B
5.01066e-67	0.270624	0.461	0.204	9.85095e-63	5	CELSR2
5.68641e-67	0.306519	0.602	0.312	1.11795e-62	5	ZBTB7A
8.86895e-67	0.286264	0.699	0.402	1.74364e-62	5	STAP2
3.80164e-66	0.254824	0.951	0.922	7.47403e-62	5	RNH1
5.46729e-66	0.285188	0.637	0.351	1.07487e-61	5	ENSHGLG00000002434
9.37019e-66	0.325827	0.531	0.263	1.84218e-61	5	MBD2
1.76196e-65	0.331786	0.708	0.43	3.46401e-61	5	ENSHGLG00000003093
2.1469e-65	0.316745	0.733	0.462	4.22081e-61	5	DBNL
2.40825e-65	0.29088	0.597	0.308	4.73462e-61	5	MVK
2.88415e-65	0.332446	0.775	0.542	5.67024e-61	5	MIEN1
3.19276e-65	0.393857	0.758	0.5	6.27697e-61	5	ENSHGLG00000019529
1.2249e-64	0.318851	0.736	0.455	2.40816e-60	5	PGAP2
1.35639e-63	0.258139	0.548	0.271	2.66667e-59	5	C1orf122
1.60418e-63	0.25235	0.434	0.188	3.15381e-59	5	PHLDB3
1.05653e-62	0.254743	0.95	0.934	2.07714e-58	5	GNG5
2.97021e-62	0.300516	0.681	0.396	5.83944e-58	5	STXBP3
4.84267e-62	0.375561	0.972	0.92	9.52068e-58	5	ZFP36L1
3.93047e-61	0.295679	0.629	0.351	7.7273e-57	5	AFDN
4.08085e-61	0.298905	0.607	0.336	8.02295e-57	5	GARS
9.75334e-61	0.279467	0.608	0.33	1.91751e-56	5	UGCG
2.46047e-60	0.320051	0.633	0.348	4.83729e-56	5	EXPH5
1.22171e-58	0.258023	0.595	0.317	2.40187e-54	5	NAPRT
1.40502e-58	0.28817	0.601	0.322	2.76227e-54	5	RNPEPL1
2.99226e-58	0.27802	0.902	0.796	5.88278e-54	5	ENSHGLG00000009529
4.3874e-58	0.283956	0.569	0.301	8.62562e-54	5	STK24
4.69977e-58	0.280721	0.642	0.373	9.23974e-54	5	MRPS18A
1.73252e-57	0.311183	0.822	0.606	3.40614e-53	5	ESRP1
2.42131e-57	0.303066	0.765	0.548	4.7603e-53	5	ATP6V0B
5.61349e-57	0.316312	0.811	0.631	1.10361e-52	5	MICOS13
1.69921e-56	0.319758	0.717	0.46	3.34065e-52	5	ENSHGLG00000016077
3.65468e-56	0.258952	0.616	0.339	7.18509e-52	5	ENSHGLG00000013240
8.28247e-56	0.281947	0.547	0.286	1.62833e-51	5	ENSHGLG00000011956
1.49326e-54	0.289574	0.692	0.436	2.93576e-50	5	CHCHD1
5.20853e-54	0.299818	0.85	0.687	1.024e-49	5	DNAJC4
3.02713e-53	0.308827	0.825	0.693	5.95133e-49	5	ENSHGLG00000007489
7.75264e-53	0.316601	0.649	0.4	1.52417e-48	5	ENSHGLG00000011812
3.03593e-52	0.296184	0.565	0.308	5.96864e-48	5	MAP4K4
5.01349e-52	0.321762	0.687	0.42	9.85652e-48	5	ENSHGLG00000030156
2.59597e-51	0.332432	0.637	0.382	5.10368e-47	5	RCC2
3.78609e-51	0.268498	0.637	0.383	7.44345e-47	5	ENSHGLG00000014590
4.96837e-51	0.305844	0.737	0.498	9.76781e-47	5	ENSHGLG00000009114
8.57569e-51	0.363682	0.714	0.491	1.68598e-46	5	ENSHGLG00000007601
9.86616e-51	0.271757	0.842	0.701	1.93969e-46	5	ISCU
1.36156e-50	0.268102	0.586	0.328	2.67683e-46	5	IQANK1
1.89884e-50	0.282074	0.75	0.522	3.73311e-46	5	STUB1
2.86645e-50	0.282339	0.677	0.428	5.63544e-46	5	ENSHGLG00000011808
1.312e-49	0.263727	0.845	0.687	2.57939e-45	5	ENSHGLG00000007350
8.7774e-49	0.280005	0.843	0.683	1.72564e-44	5	POLR2F
1.02982e-48	0.314405	0.59	0.347	2.02462e-44	5	DDIT4
4.78881e-48	0.254601	0.611	0.36	9.4148e-44	5	ACAT2
1.02595e-47	0.281933	0.68	0.428	2.01702e-43	5	ENSHGLG00000019365
3.75884e-47	0.264489	0.662	0.416	7.38988e-43	5	NUDT5
9.1191e-47	0.259755	0.88	0.74	1.79281e-42	5	NDUFB2
9.81148e-47	0.274346	0.631	0.391	1.92894e-42	5	ENSHGLG00000006167
3.19325e-46	0.260647	0.883	0.725	6.27793e-42	5	CYB5R3
7.57368e-46	0.293055	0.203	0.071	1.48899e-41	5	ENSHGLG00000029517
2.08943e-45	0.343242	0.59	0.34	4.10782e-41	5	TNKS1BP1
1.39051e-44	0.256013	0.68	0.428	2.73374e-40	5	DCTN6
4.52796e-44	0.287156	0.725	0.493	8.90196e-40	5	PTDSS1
1.2814e-43	0.432877	0.85	0.749	2.51924e-39	5	DNAJB1
3.56645e-43	0.288302	0.821	0.685	7.01165e-39	5	PSME1
4.21194e-43	0.25722	0.871	0.713	8.28068e-39	5	RALBP1
6.71493e-43	0.286293	0.828	0.652	1.32015e-38	5	ENSHGLG00000016742
6.90808e-43	0.262139	0.647	0.397	1.35813e-38	5	BLMH
7.25396e-43	0.273812	0.827	0.651	1.42613e-38	5	PSMD2
1.77747e-42	0.283247	0.896	0.769	3.4945e-38	5	ENSHGLG00000000744
5.25305e-42	0.281947	0.806	0.635	1.03275e-37	5	SDC4
2.90909e-41	0.25564	0.816	0.654	5.71927e-37	5	PPP1CA
9.46674e-41	0.25362	0.842	0.721	1.86116e-36	5	NDUFA6
1.37194e-40	0.316049	0.508	0.292	2.69723e-36	5	ATP8
5.102e-40	0.377325	0.859	0.751	1.00305e-35	5	ENSHGLG00000014117
5.50993e-39	0.250111	0.621	0.378	1.08325e-34	5	MAPK1
7.86028e-39	0.498792	0.718	0.589	1.54533e-34	5	ENSHGLG00000018639
1.76065e-37	0.298284	0.502	0.298	3.46144e-33	5	ARL4A
2.4692e-37	0.25235	0.804	0.645	4.85445e-33	5	ENSHGLG00000009089
3.20452e-37	0.263565	0.801	0.614	6.30009e-33	5	ENSHGLG00000006847
7.38245e-37	0.264882	0.659	0.443	1.45139e-32	5	NECTIN1
2.77098e-35	0.420285	0.996	0.998	5.44775e-31	5	ATP6
1.18147e-31	0.255565	0.75	0.555	2.32278e-27	5	Ddx3x
4.0963e-28	0.322178	0.759	0.627	8.05332e-24	5	ENSHGLG00000012398
4.58154e-28	0.258075	0.789	0.622	9.0073e-24	5	EPS8L2
3.0852e-26	0.372714	0.976	0.931	6.06551e-22	5	BTG2
4.89174e-24	0.266985	0.576	0.41	9.61717e-20	5	HS3ST1
4.05575e-23	0.253013	0.663	0.486	7.97361e-19	5	DDR1
6.70934e-18	0.261078	0.811	0.725	1.31906e-13	5	NFKBIZ
2.06651e-15	0.349389	0.994	0.997	4.06277e-11	5	ND2
8.21684e-14	0.290628	0.802	0.766	1.61543e-09	5	EGR1
0	1.00514	0.971	0.511	0	6	RARRES2	BSC1
4.68789e-288	0.907239	0.969	0.589	9.2164e-284	6	BCAM
8.44808e-285	0.840368	0.998	0.803	1.66089e-280	6	PRXL2A
8.25195e-265	0.511253	0.999	0.985	1.62233e-260	6	ENSHGLG00000015814
6.20293e-263	0.717502	1	0.912	1.2195e-258	6	KRT5
6.59418e-234	0.980703	0.922	0.531	1.29642e-229	6	IGFBP6
4.81145e-216	0.832176	0.985	0.876	9.4593e-212	6	S100A4
5.75128e-208	0.725295	1	0.822	1.1307e-203	6	KRT14
4.88792e-196	0.639247	0.995	0.857	9.60966e-192	6	S100P
1.79514e-178	0.666938	0.767	0.405	3.52924e-174	6	CYBA
2.25127e-177	0.767393	0.737	0.365	4.42599e-173	6	ASCL2
9.841e-174	0.534118	1	0.999	1.93474e-169	6	CSTB
3.02464e-168	0.681876	0.799	0.376	5.94644e-164	6	TNC
3.73052e-168	0.50083	0.999	0.939	7.3342e-164	6	ENSHGLG00000013637
6.15294e-166	0.632853	0.903	0.708	1.20967e-161	6	PARK7
3.36762e-162	0.674647	0.644	0.279	6.62074e-158	6	RAMP1
8.45555e-162	0.794648	0.742	0.353	1.66236e-157	6	IGFBP2
2.19935e-145	0.607053	0.86	0.546	4.32393e-141	6	MOXD1
7.90484e-145	0.61679	0.898	0.633	1.55409e-140	6	NUPR1
1.40668e-136	0.611812	0.803	0.501	2.76553e-132	6	ENSHGLG00000004606
1.48828e-135	0.702194	0.655	0.336	2.92597e-131	6	CRLF1
3.55222e-133	0.380405	0.999	0.989	6.98366e-129	6	TMSB4Y
1.1435e-132	0.625534	0.597	0.266	2.24811e-128	6	SPARC
1.06935e-127	0.600494	0.609	0.28	2.10234e-123	6	THBS2
1.31824e-122	0.565148	0.977	0.864	2.59165e-118	6	DST
3.64208e-118	0.439824	0.963	0.894	7.16033e-114	6	TXNDC17
8.11772e-118	0.402323	0.995	0.947	1.59594e-113	6	GAPDH
1.11612e-117	0.533418	0.616	0.304	2.1943e-113	6	C1S
7.68788e-117	0.734818	0.712	0.389	1.51144e-112	6	IGFBP3
3.92488e-115	0.65716	0.894	0.676	7.71631e-111	6	ENSHGLG00000015816
1.70655e-113	0.546446	0.511	0.226	3.35508e-109	6	ITIH5
1.85318e-109	0.431117	0.941	0.887	3.64336e-105	6	ENSHGLG00000014166
4.92478e-104	0.294148	1	0.996	9.68211e-100	6	CD9
1.58992e-98	0.525386	0.545	0.278	3.12578e-94	6	RPRML
2.12495e-98	0.341248	0.999	0.97	4.17766e-94	6	ENSHGLG00000001253
4.26393e-97	0.515773	0.722	0.481	8.38288e-93	6	ARHGDIB
5.37934e-89	0.427166	0.603	0.298	1.05758e-84	6	DLL1
7.23826e-86	0.414312	0.942	0.871	1.42304e-81	6	ENSHGLG00000012755
7.30864e-86	0.392866	0.689	0.385	1.43688e-81	6	SERPINH1
1.6697e-84	0.479057	0.529	0.283	3.28263e-80	6	CCDC3
2.42343e-83	0.468146	0.83	0.677	4.76447e-79	6	CPE
1.65404e-81	0.447414	0.567	0.313	3.25183e-77	6	CAV1
2.90872e-81	0.482289	0.431	0.194	5.71855e-77	6	ENSHGLG00000015774
2.07022e-80	0.433409	0.899	0.802	4.07004e-76	6	ENSHGLG00000005199
1.78493e-78	0.428519	0.555	0.311	3.50917e-74	6	WNT10A
2.60822e-70	0.478682	0.846	0.645	5.12776e-66	6	KRT17
4.46054e-70	0.330354	0.938	0.894	8.76941e-66	6	Eno1
3.31115e-68	0.436804	0.598	0.393	6.50973e-64	6	SOX15
7.41449e-68	0.440029	0.672	0.481	1.45769e-63	6	FGFR2
4.58338e-67	0.427008	0.517	0.296	9.01092e-63	6	SERPINB6
3.99652e-65	0.39237	0.752	0.605	7.85716e-61	6	CD81
2.5829e-64	0.287121	0.976	0.942	5.07798e-60	6	Ftl
1.95091e-62	0.387244	0.797	0.705	3.83549e-58	6	ENSHGLG00000015867
8.8124e-61	0.346208	0.299	0.121	1.73252e-56	6	DLK2
1.4383e-59	0.297262	0.962	0.943	2.82771e-55	6	CD63
7.36933e-58	0.559083	0.99	0.983	1.44881e-53	6	ENSHGLG00000000004
1.97809e-57	0.371463	0.816	0.725	3.88892e-53	6	TAX1BP3
3.3402e-57	0.395644	0.498	0.308	6.56683e-53	6	ENSHGLG00000001693
6.32699e-57	0.399832	0.508	0.309	1.24389e-52	6	S100A13
5.4022e-55	0.341029	0.391	0.201	1.06207e-50	6	TP73
5.91978e-55	0.352057	0.753	0.576	1.16383e-50	6	Clu
4.51525e-53	0.360447	0.427	0.236	8.87698e-49	6	PDGFA
1.31782e-52	0.344444	0.326	0.155	2.59083e-48	6	LFNG
3.61398e-52	0.383714	0.534	0.355	7.10508e-48	6	FKBP11
5.83183e-52	0.37634	0.359	0.18	1.14654e-47	6	WNT16
8.17819e-51	0.403827	0.72	0.584	1.60783e-46	6	GDPD2
2.31614e-49	0.626457	0.461	0.278	4.55352e-45	6	CXCL14
6.29191e-49	0.3465	0.749	0.64	1.23699e-44	6	MDH1
1.05568e-48	0.306097	0.242	0.097	2.07546e-44	6	NDUFA4L2
1.17665e-47	0.299741	0.923	0.884	2.3133e-43	6	Mif
1.42022e-47	0.406083	0.512	0.345	2.79215e-43	6	ITGB4
6.94743e-46	0.255705	0.985	0.964	1.36587e-41	6	LGALS3
3.40963e-44	0.308418	0.791	0.648	6.70333e-40	6	TGFBI
3.05441e-43	0.350313	0.354	0.194	6.00496e-39	6	JAG2
7.63734e-43	0.330326	0.388	0.22	1.5015e-38	6	COL14A1
8.66162e-42	0.363949	0.361	0.197	1.70287e-37	6	LGALS3BP
1.48369e-41	0.357797	0.627	0.513	2.91693e-37	6	SPPL2A
4.73224e-41	0.324775	0.598	0.476	9.30359e-37	6	NAXE
8.89461e-41	0.284767	0.314	0.159	1.74868e-36	6	EFEMP1
1.20759e-40	0.295891	0.44	0.275	2.37413e-36	6	ENSHGLG00000019467
1.21896e-40	0.2524	0.877	0.855	2.39647e-36	6	ENSHGLG00000010723
2.9707e-40	0.285782	0.845	0.785	5.8404e-36	6	ENSHGLG00000000441
1.03104e-39	0.252686	0.245	0.11	2.02702e-35	6	CISD3
1.70995e-39	0.342829	0.328	0.172	3.36176e-35	6	FST
1.86652e-39	0.299422	0.395	0.233	3.66958e-35	6	ENSHGLG00000017454
6.45955e-39	0.259399	0.276	0.134	1.26995e-34	6	RSU1
1.98068e-38	0.308497	0.734	0.662	3.89403e-34	6	GSTM2
9.02051e-38	0.319744	0.692	0.612	1.77343e-33	6	FKBP9
1.39555e-37	0.343695	0.376	0.226	2.74366e-33	6	SLC6A8
2.41007e-37	0.350075	0.548	0.405	4.73821e-33	6	ITGA6
3.00938e-37	0.308557	0.331	0.184	5.91644e-33	6	ANXA3
1.99964e-36	0.325282	0.388	0.24	3.9313e-32	6	PLTP
6.83522e-36	0.501505	0.911	0.897	1.3438e-31	6	ENSHGLG00000000002
9.26027e-36	0.333153	0.438	0.294	1.82057e-31	6	AK1
1.7058e-35	0.307988	0.474	0.332	3.35361e-31	6	WLS
7.093e-34	0.281661	0.736	0.68	1.39448e-29	6	APRT
1.39993e-33	0.291405	0.803	0.753	2.75225e-29	6	ND5
2.76309e-33	0.289228	0.687	0.604	5.43223e-29	6	SDHB
1.14513e-32	0.3564	0.847	0.818	2.25132e-28	6	TPPP3
3.73316e-31	0.256657	0.701	0.627	7.33939e-27	6	EXOSC5
3.95638e-31	0.299053	0.361	0.213	7.77824e-27	6	ACKR3
6.3642e-31	0.362988	0.422	0.287	1.2512e-26	6	SERPINB11
2.01472e-30	0.278451	0.708	0.648	3.96094e-26	6	ENSHGLG00000001520
2.73369e-30	0.269966	0.31	0.182	5.37443e-26	6	SLC39A13
2.86722e-30	0.306845	0.654	0.591	5.63695e-26	6	PSME2
8.03e-30	0.257405	0.166	0.069	1.5787e-25	6	CALD1
9.76757e-30	0.286401	0.329	0.201	1.9203e-25	6	CHD3
1.91549e-29	0.299089	0.437	0.311	3.76585e-25	6	EPHX1
2.39203e-29	0.286071	0.518	0.407	4.70274e-25	6	LRPAP1
4.99261e-29	0.274737	0.464	0.338	9.81547e-25	6	ARPC1B
7.87313e-29	0.334889	0.471	0.356	1.54786e-24	6	ENSHGLG00000018115
8.44644e-28	0.278073	0.649	0.578	1.66057e-23	6	PPA2
1.13743e-27	0.29842	0.592	0.503	2.23618e-23	6	SCNN1B
1.16021e-27	0.256457	0.29	0.169	2.28096e-23	6	ENSHGLG00000000056
1.44863e-27	0.259373	0.703	0.652	2.84801e-23	6	EHD2
7.39713e-27	0.273606	0.471	0.343	1.45428e-22	6	ACTN1
9.69536e-27	0.258257	0.817	0.798	1.90611e-22	6	KTN1
3.54211e-25	0.260842	0.348	0.232	6.9638e-21	6	TMEM109
6.048e-25	0.270675	0.372	0.257	1.18904e-20	6	TRIP6
8.66623e-25	0.266194	0.512	0.419	1.70378e-20	6	ENSHGLG00000004441
1.00853e-24	0.271262	0.334	0.22	1.98278e-20	6	ENSHGLG00000004479
1.99884e-24	0.295359	0.474	0.345	3.92972e-20	6	SMOC2
2.10103e-24	0.269855	0.527	0.436	4.13063e-20	6	MARC2
2.36614e-24	0.25474	0.481	0.361	4.65184e-20	6	CAV2
2.65609e-24	0.26797	0.292	0.176	5.22188e-20	6	HMGCS2
5.26625e-24	0.273256	0.587	0.518	1.03534e-19	6	ENSHGLG00000005051
6.69633e-24	0.256045	0.322	0.207	1.3165e-19	6	NEXN
1.01966e-23	0.257279	0.415	0.299	2.00464e-19	6	CAVIN3
1.67781e-23	0.286755	0.544	0.47	3.29858e-19	6	GPX7
2.17331e-23	0.31848	0.437	0.332	4.27273e-19	6	FLNA
2.8065e-23	0.263693	0.462	0.357	5.51758e-19	6	DKK3
3.96689e-23	0.25317	0.378	0.268	7.79891e-19	6	NME4
5.38242e-23	0.2794	0.587	0.476	1.05818e-18	6	TMSB10
3.97419e-22	0.254751	0.234	0.137	7.81325e-18	6	COL18A1
1.10161e-20	0.266758	0.587	0.532	2.16576e-16	6	ENSHGLG00000017250
1.34814e-20	0.252594	0.528	0.443	2.65045e-16	6	AJUBA
3.40037e-20	0.266188	0.499	0.425	6.68512e-16	6	DCXR
2.53689e-19	0.259832	0.454	0.359	4.98752e-15	6	P3H2
5.82825e-19	0.265021	0.379	0.282	1.14583e-14	6	S100A3
1.23966e-18	0.27349	0.456	0.362	2.43717e-14	6	NET1
6.62976e-18	0.252934	0.494	0.428	1.30341e-13	6	PRXL2B
7.49618e-18	0.251049	0.76	0.736	1.47375e-13	6	ENSHGLG00000002031
3.1265e-15	0.253709	0.635	0.616	6.1467e-11	6	KIF21A
6.22975e-15	0.257981	0.477	0.411	1.22477e-10	6	ENSHGLG00000018140
3.52397e-07	0.252809	0.355	0.305	0.00692812	6	CCN1
1.56693e-260	0.874056	0.992	0.722	3.08058e-256	7	SOCS3	BSC2
1.33795e-259	0.693329	1	1	2.63041e-255	7	ENSHGLG00000000124
3.23799e-247	0.812908	0.871	0.37	6.36589e-243	7	TNC
2.24872e-234	0.871879	0.937	0.555	4.42099e-230	7	ENSHGLG00000010931
2.67667e-214	0.704082	1	0.803	5.26233e-210	7	PRXL2A
1.08497e-211	1.10231	0.822	0.422	2.13305e-207	7	GEM
3.35486e-201	0.67442	0.962	0.513	6.59565e-197	7	RARRES2
5.38512e-190	0.615651	0.999	0.857	1.05872e-185	7	S100P
1.52394e-170	0.560773	0.718	0.286	2.99606e-166	7	DLL1
6.69287e-169	0.623308	1	0.906	1.31582e-164	7	ENSHGLG00000007955
6.57412e-165	0.582361	0.971	0.59	1.29247e-160	7	BCAM
9.23126e-165	0.637269	0.989	0.876	1.81487e-160	7	S100A4
9.48285e-159	0.587417	0.548	0.193	1.86433e-154	7	ACKR3
1.21854e-155	0.600561	0.923	0.531	2.39565e-151	7	IGFBP6
7.6749e-154	0.594556	0.78	0.376	1.50889e-149	7	SERPINH1
2.92185e-144	0.526871	0.652	0.279	5.74435e-140	7	RAMP1
1.66264e-138	0.513271	0.666	0.3	3.26875e-134	7	C1S
7.34329e-138	0.338787	1	0.985	1.44369e-133	7	ENSHGLG00000015814
8.16996e-138	0.50139	0.782	0.404	1.60621e-133	7	CYBA
4.15164e-135	0.522144	0.896	0.543	8.16212e-131	7	MOXD1
4.73396e-133	0.474084	0.999	0.94	9.30696e-129	7	Ftl
2.0128e-131	0.492197	0.804	0.473	3.95717e-127	7	ARHGDIB
2.66566e-131	0.560467	0.749	0.353	5.24069e-127	7	IGFBP2
1.25099e-125	0.501819	0.916	0.669	2.45945e-121	7	CPE
7.14796e-125	0.473366	0.951	0.768	1.40529e-120	7	ENSHGLG00000012164
1.70577e-121	0.487147	0.973	0.882	3.35355e-117	7	ENSHGLG00000015168
7.72837e-121	0.952089	0.697	0.414	1.5194e-116	7	TSC22D1
2.935e-119	0.602476	0.447	0.16	5.77022e-115	7	FST
9.11131e-117	0.480522	0.479	0.185	1.79128e-112	7	LGALS3BP
1.62096e-111	0.638267	0.735	0.387	3.1868e-107	7	IGFBP3
8.42153e-108	0.437199	0.766	0.462	1.65567e-103	7	ENSHGLG00000021023
1.18375e-105	0.394676	0.434	0.161	2.32724e-101	7	KRT16
7.34782e-105	0.316307	1	0.989	1.44458e-100	7	TMSB4Y
8.76631e-105	0.429848	0.786	0.483	1.72346e-100	7	ENSHGLG00000014245
6.37105e-100	0.269965	1	0.977	1.25255e-95	7	ENSHGLG00000009663
2.92505e-99	0.456728	1	0.913	5.75064e-95	7	KRT5
3.15437e-98	0.436734	0.904	0.639	6.20149e-94	7	KRT17
4.79204e-98	0.434949	0.887	0.639	9.42115e-94	7	TGFBI
6.13558e-98	0.461076	0.702	0.37	1.20625e-93	7	ASCL2
3.27341e-96	0.452625	0.609	0.309	6.43553e-92	7	CAV1
3.37467e-95	0.43439	0.893	0.634	6.63459e-91	7	NUPR1
1.414e-92	0.338023	0.979	0.892	2.77993e-88	7	TXNDC17
3.7684e-91	0.440766	0.584	0.284	7.40867e-87	7	THBS2
1.28336e-90	0.260049	1	0.996	2.52309e-86	7	CD9
4.18291e-90	0.399738	0.914	0.756	8.22361e-86	7	ENSHGLG00000000046
5.8996e-90	0.390827	0.481	0.21	1.15986e-85	7	COL14A1
1.08078e-89	0.326687	0.999	0.947	2.12482e-85	7	GAPDH
1.41766e-89	0.441955	0.627	0.354	2.78713e-85	7	ZFP36L2
4.65084e-89	0.504931	1	0.823	9.14356e-85	7	KRT14
5.58276e-89	0.477667	0.557	0.271	1.09757e-84	7	SPARC
2.91595e-87	0.400106	0.649	0.371	5.73277e-83	7	ENSHGLG00000020318
3.54713e-85	0.353949	0.418	0.171	6.97366e-81	7	MXRA5
1.46714e-84	0.459131	0.366	0.14	2.8844e-80	7	ENSHGLG00000017126
1.65413e-84	0.403627	0.976	0.921	3.25202e-80	7	ENSHGLG00000014414
1.92902e-84	0.46409	0.929	0.714	3.79245e-80	7	NR4A1
4.56769e-84	0.384435	0.74	0.474	8.98007e-80	7	FGFR2
2.1276e-82	0.457259	0.721	0.487	4.18286e-78	7	Azin1
5.08125e-82	0.424528	0.633	0.339	9.98973e-78	7	CRLF1
7.00765e-81	0.407179	0.445	0.193	1.3777e-76	7	ENSHGLG00000015774
3.11293e-79	0.45028	0.393	0.166	6.12002e-75	7	HMGCS2
3.74376e-77	0.321037	0.329	0.118	7.36024e-73	7	DLK2
1.50772e-75	0.327088	0.355	0.14	2.96417e-71	7	ZBTB16
4.56771e-75	0.427967	0.88	0.695	8.98012e-71	7	KCNK1
4.84695e-75	0.375243	0.809	0.57	9.5291e-71	7	Clu
7.44472e-74	0.423012	0.488	0.254	1.46363e-69	7	PLEKHF1
2.13942e-73	0.292372	1	0.939	4.2061e-69	7	ENSHGLG00000013637
2.53192e-73	0.346622	0.435	0.197	4.97776e-69	7	TP73
5.93271e-73	0.290583	0.989	0.924	1.16637e-68	7	ENSHGLG00000021146
3.8816e-72	0.447439	0.978	0.896	7.63122e-68	7	Sat1
2.2497e-71	0.355873	0.779	0.504	4.42291e-67	7	ENSHGLG00000004606
2.44545e-71	0.41689	0.782	0.569	4.80776e-67	7	ENSHGLG00000007665
2.74013e-71	0.326113	0.37	0.153	5.3871e-67	7	EFEMP1
1.35328e-69	0.273631	0.239	0.074	2.66056e-65	7	SFRP1
5.39439e-68	0.362742	0.667	0.439	1.06054e-63	7	ENSHGLG00000020952
3.4911e-67	0.414716	0.99	0.894	6.86351e-63	7	NFKBIA
1.33713e-66	0.339172	0.544	0.294	2.62879e-62	7	SERPINB6
6.05397e-66	0.361281	0.556	0.332	1.19021e-61	7	ENSHGLG00000020714
9.12993e-66	0.394766	0.909	0.806	1.79494e-61	7	SLC38A2
1.3188e-65	0.337227	0.904	0.789	2.59275e-61	7	ENSHGLG00000020347
1.47457e-65	0.342914	0.51	0.279	2.899e-61	7	ENSHGLG00000015746
1.84623e-65	0.355145	0.878	0.676	3.62968e-61	7	BHLHE40
1.58458e-64	0.262667	0.985	0.944	3.11529e-60	7	ENSHGLG00000019179
4.45507e-63	0.32915	0.573	0.332	8.75868e-59	7	ACTN1
7.4458e-61	0.292347	0.399	0.19	1.46385e-56	7	JAG2
9.22349e-61	0.315789	0.429	0.214	1.81334e-56	7	ENSHGLG00000011629
1.35509e-60	0.351131	0.548	0.313	2.66411e-56	7	WNT10A
2.74868e-60	0.329825	0.538	0.307	5.40391e-56	7	S100A13
1.37178e-59	0.34427	0.588	0.35	2.69691e-55	7	CAV2
2.60348e-59	0.310228	0.457	0.233	5.11845e-55	7	PDGFA
6.56174e-59	0.375177	0.206	0.063	1.29004e-54	7	GBP1
3.88448e-58	0.312052	0.406	0.202	7.63689e-54	7	ENSHGLG00000030882
9.7881e-58	0.272569	0.979	0.908	1.92434e-53	7	ENSHGLG00000015631
1.42081e-57	0.323929	0.736	0.551	2.79331e-53	7	ENSHGLG00000007134
1.79813e-57	0.339953	0.289	0.115	3.53512e-53	7	SERPINE1
2.25189e-57	0.370255	0.564	0.336	4.42721e-53	7	SMOC2
4.41286e-57	0.454111	0.33	0.144	8.67568e-53	7	ADAMTS1
5.25575e-57	0.297701	0.452	0.233	1.03328e-52	7	ITIH5
1.38709e-56	0.305069	0.532	0.316	2.72701e-52	7	ENSHGLG00000003034
1.72454e-56	0.30366	0.885	0.678	3.39045e-52	7	ENSHGLG00000015816
3.84258e-55	0.335425	0.533	0.325	7.55452e-51	7	LAMC2
5.36879e-54	0.266364	0.969	0.868	1.0555e-49	7	ENSHGLG00000012755
6.00487e-54	0.303117	0.8	0.636	1.18056e-49	7	ENSHGLG00000021380
7.42507e-54	0.31128	0.514	0.307	1.45977e-49	7	ENSHGLG00000001693
4.23041e-53	0.313157	0.553	0.341	8.31698e-49	7	ITGB4
2.40493e-52	0.270949	0.376	0.187	4.72809e-48	7	ENSHGLG00000000053
2.58765e-52	0.330625	1	0.971	5.08731e-48	7	Fos
3.24949e-51	0.305599	0.432	0.236	6.38849e-47	7	ENSHGLG00000008790
4.4653e-51	0.398802	0.528	0.336	8.77878e-47	7	CEBPD
4.22506e-50	0.296548	0.445	0.25	8.30646e-46	7	TRIP6
6.13287e-50	0.332624	0.728	0.536	1.20572e-45	7	CSRNP1
1.17223e-49	0.296708	0.473	0.276	2.30461e-45	7	DSG2
1.03366e-48	0.289747	0.397	0.214	2.03217e-44	7	ENSHGLG00000004479
1.53385e-48	0.271932	0.531	0.323	3.01556e-44	7	FLNA
1.6037e-48	0.32254	0.701	0.507	3.15287e-44	7	KLF9
3.49149e-47	0.311466	0.784	0.605	6.86427e-43	7	SERTAD1
5.13517e-47	0.275509	0.362	0.18	1.00957e-42	7	WNT16
2.11389e-46	0.270784	0.468	0.272	4.1559e-42	7	ENSHGLG00000019467
2.29626e-46	0.290349	0.713	0.555	4.51444e-42	7	ENSHGLG00000021196
3.59385e-46	0.273675	0.526	0.332	7.06551e-42	7	ARPC1B
2.74743e-45	0.394866	0.754	0.581	5.40146e-41	7	ERRFI1
9.07369e-45	0.251807	0.388	0.208	1.78389e-40	7	ENSHGLG00000018524
1.26893e-44	0.272534	0.245	0.102	2.49472e-40	7	RASL11A
2.35974e-44	0.291623	0.669	0.495	4.63925e-40	7	SCNN1B
4.71989e-44	0.252978	0.288	0.134	9.27931e-40	7	PLA2R1
3.03102e-43	0.316732	0.653	0.469	5.95898e-39	7	TMSB10
5.22993e-42	0.264707	0.443	0.261	1.02821e-37	7	NME4
8.85492e-42	0.271972	0.484	0.288	1.74088e-37	7	CCDC3
4.18514e-41	0.253659	0.451	0.273	8.22798e-37	7	ENSHGLG00000016323
9.42195e-41	0.260475	0.528	0.345	1.85235e-36	7	ENSHGLG00000003334
9.82001e-41	0.27137	0.674	0.509	1.93061e-36	7	SPPL2A
1.13964e-40	0.257691	0.944	0.809	2.24053e-36	7	ENSHGLG00000006687
1.59406e-40	0.311022	0.501	0.321	3.13392e-36	7	ATF3
6.07382e-40	0.438873	0.456	0.279	1.19411e-35	7	CXCL14
6.55385e-40	0.263777	0.586	0.401	1.28849e-35	7	ITGA6
7.44271e-40	0.285782	0.698	0.552	1.46324e-35	7	G3BP2
9.83e-39	0.289724	0.778	0.612	1.93258e-34	7	DNAJB4
3.02336e-37	0.279943	0.549	0.389	5.94393e-33	7	ENSHGLG00000002441
5.05993e-37	0.255485	0.219	0.092	9.94782e-33	7	PLAUR
5.83949e-37	0.275065	0.526	0.356	1.14804e-32	7	FKBP11
1.1936e-36	0.320601	0.772	0.65	2.34663e-32	7	ATP1A1
1.52878e-36	0.257695	0.47	0.299	3.00558e-32	7	2009-09-01
4.15044e-33	0.450817	0.453	0.294	8.15976e-29	7	CCN1
1.19233e-32	0.250412	0.8	0.693	2.34411e-28	7	ENSHGLG00000004941
1.6041e-30	0.265346	0.605	0.469	3.15366e-26	7	JMJD1C
8.11523e-30	0.269561	0.606	0.469	1.59545e-25	7	MRPS6
4.2777e-28	0.290218	0.573	0.434	8.40996e-24	7	IER3
3.15105e-27	0.4603	0.32	0.183	6.19497e-23	7	CXCL8
5.4921e-25	0.266582	0.568	0.448	1.07975e-20	7	ENSHGLG00000007594
8.30879e-25	0.266328	0.423	0.287	1.63351e-20	7	SERPINB11
4.04155e-23	0.257849	0.713	0.641	7.94568e-19	7	TOP1
4.92059e-21	0.325175	0.61	0.526	9.67388e-17	7	ENSHGLG00000007289
7.31893e-21	0.643243	0.177	0.089	1.4389e-16	7	CCL2
1.05014e-16	0.25973	0.223	0.133	2.06458e-12	7	ENSHGLG00000001040
0	4.98733	0.682	0.052	0	8	LOR	Cor
0	4.6569	0.379	0.016	0	8	ENSHGLG00000008670
0	3.63549	0.982	0.12	0	8	Cryab
0	3.53699	0.881	0.057	0	8	ENSHGLG00000020738
0	3.45403	0.505	0.009	0	8	C1orf68
0	3.22705	0.289	0.004	0	8	LCE5A
0	2.72833	0.982	0.155	0	8	LYPD2
0	2.62345	0.935	0.031	0	8	SERPINA12
0	2.52977	0.574	0.015	0	8	ENSHGLG00000029515
0	2.47876	0.975	0.041	0	8	KRT23
0	2.25804	0.202	0.002	0	8	LCE1C
0	2.2279	0.928	0.029	0	8	WFDC5
0	2.20482	0.986	0.159	0	8	ANXA9
0	2.11612	0.931	0.046	0	8	ENSHGLG00000012992
0	2.04536	0.249	0.001	0	8	ENSHGLG00000020457
0	2.00125	0.664	0.021	0	8	ENSHGLG00000007169
0	1.92062	0.419	0.003	0	8	LYZ
0	1.9168	0.957	0.12	0	8	KRT80
0	1.89576	0.606	0.003	0	8	SPINK7
0	1.87113	0.816	0.057	0	8	CYSRT1
0	1.8564	0.884	0.05	0	8	DNASE1L2
0	1.82595	0.903	0.085	0	8	IL36RN
0	1.78861	0.96	0.105	0	8	FAM89A
0	1.7575	0.726	0.063	0	8	CTSH
0	1.71452	0.942	0.149	0	8	GDPD3
0	1.62071	0.924	0.116	0	8	ATP6V1C2
0	1.55555	0.848	0.009	0	8	TMEM45B
0	1.55019	0.173	0.001	0	8	ENSHGLG00000019532
0	1.51803	0.819	0.013	0	8	DEGS2
0	1.46129	0.693	0.004	0	8	KLK7
0	1.39157	0.87	0.107	0	8	ENSHGLG00000003492
0	1.36897	0.812	0.052	0	8	PRDM1
0	1.36778	0.892	0.092	0	8	ALOX12B
0	1.30384	0.65	0.032	0	8	RNF227
0	1.26236	0.819	0.032	0	8	SLC46A2
0	1.25766	0.682	0.007	0	8	ELMOD1
0	1.25311	0.697	0.018	0	8	GJB2
0	1.23461	0.56	0.001	0	8	ABHD12B
0	1.22692	0.798	0.068	0	8	SEC14L1
0	1.09177	0.841	0.087	0	8	SUSD2
0	1.08896	0.245	0.002	0	8	ENSHGLG00000012509
0	1.0779	0.509	0.006	0	8	ELF5
0	1.07711	0.52	0.016	0	8	OTUB2
0	1.07253	0.758	0.01	0	8	SLC15A1
0	1.00586	0.581	0.038	0	8	TNNT2
0	0.987644	0.682	0.061	0	8	MZB1
0	0.978658	0.588	0.006	0	8	VASN
0	0.962587	0.502	0.007	0	8	SMPD3
0	0.953584	0.22	0.002	0	8	CPA4
0	0.912801	0.744	0.041	0	8	XKRX
0	0.900341	0.711	0.042	0	8	GPLD1
0	0.850132	0.426	0.001	0	8	KLK9
0	0.847991	0.191	0	0	8	ENSHGLG00000007464
0	0.840817	0.657	0.015	0	8	ENSHGLG00000012877
0	0.834567	0.581	0.023	0	8	KLK5
0	0.827942	0.657	0.041	0	8	ALOXE3
0	0.786666	0.307	0.001	0	8	BTC
0	0.755409	0.347	0.004	0	8	ACY3
0	0.748003	0.534	0.017	0	8	ATP6V1B1
0	0.734573	0.643	0.056	0	8	LYPD5
0	0.722305	0.444	0.007	0	8	RARRES1
0	0.704053	0.531	0.012	0	8	TMEM229B
0	0.667134	0.375	0.009	0	8	NKPD1
0	0.648187	0.202	0.002	0	8	PAQR7
0	0.621536	0.235	0.002	0	8	ENSHGLG00000000919
0	0.620091	0.332	0.002	0	8	ENSHGLG00000027346
0	0.613084	0.498	0.019	0	8	SHROOM3
0	0.610019	0.505	0.008	0	8	CMTM8
0	0.605211	0.513	0.029	0	8	CARD9
0	0.604857	0.394	0.002	0	8	HHLA2
0	0.588586	0.419	0.004	0	8	PAQR8
0	0.584233	0.209	0.001	0	8	SDCBP2
0	0.580576	0.448	0.007	0	8	GJB4
0	0.556928	0.466	0.008	0	8	FLVCR2
0	0.530665	0.513	0.032	0	8	GSDMA
0	0.519253	0.404	0.018	0	8	HAL
0	0.504776	0.375	0.015	0	8	KIFC3
0	0.473418	0.455	0.023	0	8	PTRH1
0	0.453766	0.39	0.01	0	8	CPM
0	0.391818	0.321	0.01	0	8	SLC34A2
0	0.38875	0.296	0.008	0	8	GMFG
0	0.387813	0.318	0.006	0	8	HPSE
0	0.361192	0.26	0.003	0	8	PRSS27
0	0.345694	0.242	0.002	0	8	SEMA7A
0	0.339932	0.184	0.001	0	8	GABRP
0	0.33505	0.321	0.01	0	8	MARCH3
0	0.325808	0.292	0.004	0	8	CNTFR
0	0.308229	0.321	0.004	0	8	LPO
0	0.297824	0.206	0.002	0	8	ENSHGLG00000027650
0	0.289911	0.303	0.006	0	8	CDSN
0	0.287428	0.231	0.002	0	8	SEC14L4
0	0.263461	0.195	0.001	0	8	ATP12A
1.36932e-303	0.855846	0.339	0.013	2.69208e-299	8	DEXI
9.96139e-300	2.4658	0.982	0.201	1.95841e-295	8	LY6G6C
9.93124e-298	0.425866	0.383	0.017	1.95248e-293	8	NPC1
2.21804e-294	0.578342	0.495	0.033	4.36068e-290	8	PLEKHM1
1.23098e-291	0.752042	0.661	0.065	2.4201e-287	8	ACSBG1
8.12135e-291	1.19043	0.903	0.143	1.59666e-286	8	TGM1
7.17237e-289	0.456695	0.292	0.009	1.41009e-284	8	SLC49A3
4.3866e-287	1.20425	0.834	0.117	8.62406e-283	8	MYO6
3.45857e-284	1.8767	0.964	0.204	6.79954e-280	8	RNF39
4.95696e-284	0.512355	0.491	0.034	9.74539e-280	8	TTC9
3.15535e-283	2.28953	0.975	0.215	6.20341e-279	8	LYNX1-SLURP2
1.7017e-278	1.01366	0.718	0.082	3.34553e-274	8	KCTD5
4.01172e-276	0.907424	0.729	0.087	7.88704e-272	8	GPR137B
1.52265e-274	0.481265	0.426	0.025	2.99353e-270	8	KLK11
4.60607e-270	0.293147	0.303	0.011	9.05552e-266	8	COMP
6.4824e-268	0.597444	0.191	0.003	1.27444e-263	8	STS
3.83095e-264	1.24319	0.17	0.002	7.53164e-260	8	KCTD4
1.14229e-257	0.398102	0.383	0.021	2.24575e-253	8	SERPINB7
1.53826e-257	1.2272	0.78	0.116	3.02422e-253	8	IDE
1.96513e-256	3.597	1	0.301	3.86344e-252	8	ENSHGLG00000014982
1.26422e-255	2.26925	1	0.283	2.48546e-251	8	ENSHGLG00000006883
1.08223e-254	1.06245	0.794	0.118	2.12767e-250	8	ENSHGLG00000014843
2.0896e-248	0.343504	0.303	0.013	4.10816e-244	8	NCCRP1
1.42051e-246	1.72102	0.866	0.168	2.79272e-242	8	TREX2
5.54467e-246	1.42722	0.733	0.108	1.09008e-241	8	IPO13
3.00752e-245	0.496115	0.119	0	5.91279e-241	8	LCE1B
4.14258e-245	0.506981	0.227	0.006	8.1443e-241	8	Gpat3
5.57544e-243	0.86438	0.758	0.108	1.09613e-238	8	BCL2L1
2.418e-242	0.533777	0.585	0.059	4.75379e-238	8	ENSHGLG00000009194
9.29258e-241	0.520937	0.249	0.008	1.82692e-236	8	SYBU
1.18983e-238	1.41861	0.866	0.172	2.3392e-234	8	KLK8
1.37329e-234	0.706599	0.708	0.093	2.69989e-230	8	SLC39A2
4.94247e-234	1.40408	0.895	0.183	9.71689e-230	8	ABHD5
6.2174e-234	1.16846	0.744	0.118	1.22234e-229	8	ENSHGLG00000003171
7.51354e-233	0.261166	0.285	0.012	1.47716e-228	8	ENSHGLG00000001766
1.57936e-232	0.860577	0.769	0.117	3.10503e-228	8	ABCA12
3.46349e-232	2.88237	1	0.341	6.80921e-228	8	CSTA
7.70081e-230	0.259601	0.137	0.001	1.51398e-225	8	ENSHGLG00000027924
9.74805e-230	1.88589	0.949	0.243	1.91647e-225	8	SPSB3
9.26217e-227	0.392337	0.404	0.028	1.82094e-222	8	ENSHGLG00000025472
1.17766e-226	0.615489	0.523	0.051	2.31528e-222	8	ENC1
2.56877e-226	0.512024	0.44	0.034	5.0502e-222	8	SCN1B
4.2117e-226	0.337031	0.35	0.02	8.28021e-222	8	ATP13A4
8.31782e-223	3.22972	0.993	0.344	1.63528e-218	8	GLRX
4.86849e-221	0.653907	0.625	0.077	9.57146e-217	8	MPZL3
6.64739e-219	0.349672	0.141	0.002	1.30688e-214	8	UPK3A
2.03158e-213	3.25594	1	0.424	3.99409e-209	8	SBSN
3.17045e-213	0.418606	0.408	0.031	6.23311e-209	8	CSDC2
5.4108e-212	1.98766	0.812	0.171	1.06376e-207	8	FAM110A
1.43758e-207	0.682838	0.628	0.082	2.82627e-203	8	SLC50A1
2.66878e-207	1.19261	0.888	0.208	5.24683e-203	8	HMGCR
1.06553e-202	0.470661	0.422	0.035	2.09484e-198	8	RAPGEF4
2.49358e-202	1.2286	0.899	0.208	4.90239e-198	8	EPS8L1
3.48729e-202	1.74004	0.913	0.261	6.85602e-198	8	YPEL3
3.65942e-200	0.408937	0.383	0.029	7.19442e-196	8	FMO5
4.77023e-200	2.52329	0.993	0.382	9.37827e-196	8	CNFN
3.26922e-199	0.386881	0.368	0.027	6.42728e-195	8	WDR86
3.53988e-199	3.80425	0.996	0.459	6.95941e-195	8	ENSHGLG00000004768
1.84293e-198	0.802505	0.491	0.051	3.62319e-194	8	IL1A
4.26977e-197	1.43872	0.978	0.318	8.39436e-193	8	POF1B
3.41439e-190	1.87596	0.971	0.375	6.71269e-186	8	ID4
1.30937e-189	0.427987	0.383	0.031	2.57423e-185	8	ENSHGLG00000019603
1.66224e-189	0.327417	0.285	0.016	3.26796e-185	8	ENSHGLG00000019301
1.04713e-187	1.18525	0.657	0.104	2.05866e-183	8	MAP3K8
4.98934e-187	1.27461	0.848	0.201	9.80903e-183	8	MID1IP1
1.99576e-186	0.735629	0.592	0.082	3.92366e-182	8	RGS2
3.17047e-186	0.554338	0.422	0.039	6.23314e-182	8	LMBRD2
2.09712e-185	1.49824	0.783	0.16	4.12294e-181	8	ZDHHC9
5.35262e-185	0.253762	0.289	0.017	1.05232e-180	8	GAN
9.6837e-185	1.87907	0.996	0.46	1.90381e-180	8	SULT2B1
1.09308e-183	0.645455	0.581	0.079	2.14899e-179	8	ENSHGLG00000003821
2.82083e-183	2.2533	0.996	0.437	5.54574e-179	8	SPINK5
8.91278e-183	1.15441	0.74	0.141	1.75225e-178	8	EPN3
4.61369e-181	0.386747	0.303	0.019	9.07051e-177	8	PHETA1
5.06759e-181	1.48599	0.935	0.331	9.96288e-177	8	CCHCR1
1.30795e-180	1.78161	0.996	0.546	2.57142e-176	8	MAP1LC3A
2.88889e-180	0.253344	0.256	0.013	5.67956e-176	8	FCHO1
4.25609e-180	0.260086	0.108	0.001	8.36748e-176	8	TAC3
5.09419e-179	1.0598	0.848	0.215	1.00152e-174	8	ENSHGLG00000011374
1.2038e-178	0.760603	0.646	0.102	2.36666e-174	8	C1orf116
7.76868e-178	0.72475	0.668	0.11	1.52732e-173	8	PAQR5
5.01436e-176	1.79593	0.993	0.427	9.85823e-172	8	CLIC3
3.56874e-174	0.423894	0.336	0.026	7.01614e-170	8	NDRG4
4.24498e-174	1.07009	0.913	0.252	8.34562e-170	8	DBNDD2
5.45099e-171	2.09144	1	0.995	1.07166e-166	8	ENSHGLG00000007309
6.60233e-171	2.96127	0.996	0.755	1.29802e-166	8	ENSHGLG00000014117
1.05346e-170	1.53152	0.946	0.342	2.0711e-166	8	DGAT2
3.72704e-169	1.49542	0.773	0.195	7.32736e-165	8	ENSHGLG00000015598
6.79182e-168	0.56546	0.581	0.084	1.33527e-163	8	MAP2
5.71807e-164	0.43165	0.44	0.049	1.12417e-159	8	TP53INP2
1.34801e-163	1.76	0.816	0.224	2.65019e-159	8	PPIF
7.51861e-163	0.829314	0.769	0.164	1.47816e-158	8	CALCOCO1
9.9701e-163	1.4056	0.996	0.917	1.96012e-158	8	CLTB
1.87003e-162	1.4318	1	0.844	3.67648e-158	8	ZNF706
2.97689e-162	1.04033	0.592	0.096	5.85256e-158	8	ENSHGLG00000016610
3.20064e-162	0.312475	0.325	0.026	6.29246e-158	8	NFE2L3
1.66811e-161	0.481791	0.498	0.064	3.27951e-157	8	PLEKHG1
2.53509e-161	0.654866	0.56	0.083	4.98398e-157	8	EHD1
2.62804e-160	0.945925	0.845	0.222	5.16672e-156	8	ENSHGLG00000013753
1.33675e-158	0.282934	0.271	0.018	2.62805e-154	8	RETREG1
1.45562e-157	0.835538	0.758	0.169	2.86174e-153	8	BICDL2
3.62303e-157	1.09285	0.913	0.277	7.12288e-153	8	NECTIN4
9.65901e-155	0.711976	0.664	0.123	1.89896e-150	8	OPA1
1.10276e-153	0.782201	0.668	0.131	2.16803e-149	8	SLC30A1
1.14964e-153	0.399377	0.444	0.052	2.2602e-149	8	PGLYRP2
1.36356e-153	0.797717	0.736	0.159	2.68075e-149	8	CARS
3.35273e-153	0.873783	0.776	0.179	6.59147e-149	8	ENSHGLG00000000866
1.19568e-152	0.929272	0.917	0.286	2.35071e-148	8	ENSHGLG00000007976
1.35037e-152	1.68632	1	0.998	2.65482e-148	8	KRTDAP
3.355e-152	1.46977	0.949	0.371	6.59593e-148	8	ENSHGLG00000015163
5.45788e-151	0.630744	0.516	0.074	1.07302e-146	8	RDH13
6.1893e-151	0.280222	0.307	0.025	1.21682e-146	8	HS3ST6
7.68665e-151	1.94826	0.968	0.617	1.51119e-146	8	MSMO1
4.66169e-150	1.81069	0.581	0.102	9.16489e-146	8	SLPI
1.60289e-149	0.76178	0.747	0.164	3.15128e-145	8	ENSHGLG00000014227
2.92624e-149	1.41142	0.87	0.288	5.75299e-145	8	NRDC
3.00975e-149	0.799502	0.686	0.139	5.91718e-145	8	EGLN3
5.66814e-149	0.640899	0.635	0.118	1.11436e-144	8	CPEB4
1.38146e-148	1.36999	0.968	0.414	2.71595e-144	8	ENSHGLG00000019025
1.52253e-147	0.54039	0.563	0.089	2.9933e-143	8	ITPKB
1.6358e-147	2.15303	0.982	0.676	3.21599e-143	8	GABARAPL2
2.05302e-146	0.348139	0.318	0.028	4.03623e-142	8	TEX264
3.70391e-145	0.888816	0.834	0.236	7.28188e-141	8	RMND5A
3.92806e-144	0.925204	0.697	0.149	7.72256e-140	8	STARD5
9.12901e-143	1.27917	0.986	0.552	1.79476e-138	8	CERS2
4.50455e-140	2.02826	0.996	0.981	8.85594e-136	8	HOPX
6.50315e-139	0.539185	0.513	0.078	1.27852e-134	8	ENSHGLG00000013186
4.253e-138	0.937408	0.834	0.256	8.36139e-134	8	GNG12
4.11912e-137	0.55833	0.632	0.12	8.0982e-133	8	PRRG2
1.72505e-136	0.289256	0.303	0.027	3.39144e-132	8	ISG20
2.80116e-136	1.51856	0.971	0.48	5.50708e-132	8	RGCC
2.8805e-135	0.863386	0.83	0.237	5.66307e-131	8	SMPDL3A
3.41279e-135	0.559968	0.52	0.083	6.70954e-131	8	ZNF584
6.77752e-135	0.352757	0.412	0.051	1.33246e-130	8	METRNL
2.28756e-134	1.61022	0.957	0.489	4.49735e-130	8	R3HDM4
4.24004e-133	1.06816	0.819	0.251	8.33591e-129	8	HMGCS1
4.66206e-133	0.386644	0.354	0.038	9.16561e-129	8	SNX18
7.2637e-133	1.15948	0.996	0.801	1.42804e-128	8	TUBA4A
2.75403e-132	0.615441	0.556	0.097	5.41443e-128	8	PCGF3
8.38739e-132	1.00844	0.996	0.997	1.64896e-127	8	ENSHGLG00000013614
1.04694e-131	0.479103	0.184	0.009	2.05829e-127	8	PLA2G7
6.74967e-130	1.40708	0.996	0.891	1.32699e-125	8	ENSHGLG00000001665
8.58164e-130	0.449598	0.505	0.081	1.68715e-125	8	ACOT7
2.80486e-129	1.04195	0.899	0.351	5.51435e-125	8	ENSHGLG00000013240
1.29368e-128	1.06608	0.866	0.34	2.54338e-124	8	EPHX3
1.45802e-127	0.956165	0.448	0.065	2.86647e-123	8	Hexb
1.56562e-127	0.545175	0.585	0.11	3.07801e-123	8	TMEM164
2.48035e-126	1.14061	0.978	0.735	4.87637e-122	8	RORA
2.88866e-126	0.430144	0.484	0.074	5.6791e-122	8	PLEKHA2
6.70961e-126	0.733469	0.747	0.193	1.31911e-121	8	ENSHGLG00000005336
1.18284e-124	1.05589	0.996	0.966	2.32545e-120	8	NDUFA4
6.85609e-124	0.493798	0.437	0.063	1.34791e-119	8	USP2
8.01044e-124	0.51639	0.56	0.101	1.57485e-119	8	CCDC120
7.86603e-122	0.684857	0.668	0.148	1.54646e-117	8	PNPLA2
8.38291e-121	0.523085	0.516	0.089	1.64808e-116	8	SASH1
1.14483e-120	1.23901	0.892	0.378	2.25074e-116	8	ENSHGLG00000008798
2.88872e-120	1.03364	0.971	0.693	5.67923e-116	8	ENSHGLG00000015530
3.84837e-120	0.586035	0.57	0.112	7.5659e-116	8	GBA
7.36871e-120	0.69754	0.675	0.165	1.44869e-115	8	ELOVL7
7.79075e-120	1.16858	0.964	0.567	1.53166e-115	8	ENSHGLG00000006236
1.01409e-119	0.541491	0.585	0.117	1.9937e-115	8	MAP7
1.21905e-119	0.820323	0.852	0.283	2.39665e-115	8	USP7
1.88018e-119	1.08463	0.953	0.563	3.69644e-115	8	ENSHGLG00000004558
3.95631e-119	0.299105	0.361	0.044	7.77811e-115	8	GPR157
4.75037e-119	0.337756	0.354	0.042	9.33922e-115	8	SYT12
8.23305e-119	0.509881	0.56	0.105	1.61862e-114	8	STK17B
1.50516e-118	0.522397	0.585	0.116	2.95913e-114	8	CTTNBP2NL
3.82214e-118	1.04146	0.823	0.291	7.51433e-114	8	GRHL1
8.37446e-118	0.863285	1	0.949	1.64642e-113	8	S100A16
1.56288e-117	0.854896	0.762	0.225	3.07262e-113	8	EGR3
1.95907e-117	0.554272	0.531	0.099	3.85154e-113	8	HSD17B14
8.11368e-117	0.975375	0.881	0.343	1.59515e-112	8	UGCG
1.42647e-116	1.04917	0.827	0.321	2.80443e-112	8	Srpk1
6.14753e-116	0.48971	0.603	0.123	1.2086e-111	8	UBTD1
4.50195e-115	1.13947	0.791	0.291	8.85083e-111	8	SPTSSB
3.61361e-114	0.554365	0.581	0.119	7.10436e-110	8	PLEKHA5
4.98818e-114	1.37637	0.729	0.207	9.80676e-110	8	RNF223
5.6167e-114	0.53657	0.534	0.101	1.10424e-109	8	RALGAPB
6.32759e-114	1.09769	0.942	0.677	1.244e-109	8	ENSHGLG00000011657
4.8725e-113	0.712666	0.61	0.137	9.57934e-109	8	FBXO30
1.95773e-112	0.877897	0.986	0.716	3.84889e-108	8	ATP6V0E1
2.01176e-112	0.405154	0.502	0.089	3.95512e-108	8	MAPKAPK3
2.10042e-112	0.396385	0.487	0.084	4.12942e-108	8	PARP6
3.59778e-112	0.494297	0.477	0.083	7.07323e-108	8	POLRMT
6.4928e-112	1.02704	0.866	0.36	1.27648e-107	8	ENSHGLG00000017892
6.92218e-112	0.766478	0.805	0.249	1.3609e-107	8	BPIFC
7.76324e-112	0.297655	0.289	0.03	1.52625e-107	8	STARD13
9.13391e-112	0.564405	0.433	0.069	1.79573e-107	8	ACPP
1.00848e-111	0.445585	0.498	0.089	1.98268e-107	8	PLA2G4E
2.54649e-109	0.332852	0.339	0.042	5.00639e-105	8	Pfkfb2
1.45463e-108	0.685929	0.646	0.159	2.8598e-104	8	MCOLN1
3.65004e-108	0.345061	0.386	0.055	7.17599e-104	8	ZNF710
4.43734e-108	0.866137	0.989	0.854	8.72381e-104	8	NOP10
5.6363e-108	0.902246	0.884	0.4	1.1081e-103	8	TMEM54
6.99542e-108	0.495868	0.552	0.113	1.3753e-103	8	TMEM125
7.52768e-108	1.43923	0.931	0.592	1.47994e-103	8	ENSHGLG00000018639
1.2515e-107	0.266294	0.282	0.029	2.46045e-103	8	ENSHGLG00000004946
2.03933e-107	0.537587	0.578	0.126	4.00931e-103	8	PEA15
5.88079e-107	1.21245	0.917	0.511	1.15616e-102	8	LGALSL
6.7504e-107	4.11224	0.531	0.116	1.32713e-102	8	ENSHGLG00000005893
6.30573e-106	1.4536	0.989	0.994	1.23971e-101	8	HSPB1
1.47992e-105	0.696023	0.653	0.164	2.90952e-101	8	GNG13
3.47377e-105	0.353116	0.444	0.074	6.82943e-101	8	TM7SF2
2.89777e-104	1.20293	0.671	0.202	5.69702e-100	8	CITED2
2.52399e-103	0.68618	0.632	0.155	4.96217e-99	8	CREG1
4.17047e-103	0.497828	0.534	0.108	8.19914e-99	8	CRYBG2
2.85008e-102	0.918482	0.982	0.756	5.60326e-98	8	ENSHGLG00000007806
5.06592e-102	1.21676	0.964	0.734	9.9596e-98	8	TOB1
1.26973e-100	0.580393	1	0.992	2.4963e-96	8	EIF1
1.38612e-100	0.876472	0.87	0.372	2.72512e-96	8	ITPRID2
1.85719e-100	0.891944	0.841	0.341	3.65123e-96	8	OVOL1
1.22142e-99	0.602314	0.635	0.161	2.40132e-95	8	SLC16A1
1.65248e-99	0.515947	0.603	0.147	3.24877e-95	8	ENSHGLG00000018848
4.42925e-99	0.853801	0.892	0.418	8.7079e-95	8	STAP2
7.22746e-99	1.33291	0.953	0.525	1.42092e-94	8	TMEM40
7.60242e-99	0.320212	0.375	0.057	1.49464e-94	8	ATP10B
1.86781e-98	0.44678	0.531	0.111	3.67212e-94	8	MAPK3
1.08866e-97	0.723335	0.664	0.187	2.1403e-93	8	ENSHGLG00000010158
1.46253e-96	0.604412	0.621	0.156	2.87533e-92	8	C1orf210
1.55685e-96	0.253705	0.231	0.022	3.06077e-92	8	PRSS8
1.97289e-96	0.307995	0.419	0.07	3.8787e-92	8	ENSHGLG00000018058
1.58166e-94	1.04529	0.819	0.308	3.10955e-90	8	OSBPL1A
1.79594e-94	0.89082	0.964	0.827	3.53082e-90	8	PRDX2
1.93906e-94	0.694631	0.765	0.258	3.8122e-90	8	ENSHGLG00000009399
2.37853e-94	1.22664	0.852	0.356	4.67619e-90	8	ENSHGLG00000004820
1.38561e-93	0.311315	0.372	0.058	2.72411e-89	8	ENSHGLG00000015761
9.18324e-93	0.781478	0.921	0.534	1.80543e-88	8	STUB1
6.73391e-92	0.736247	0.736	0.236	1.32389e-87	8	ANKH
3.60042e-91	0.811583	0.931	0.56	7.07842e-87	8	ENSHGLG00000002491
9.79294e-91	0.297843	0.401	0.068	1.92529e-86	8	KIAA0513
5.09932e-90	0.777299	0.668	0.197	1.00253e-85	8	ENSHGLG00000030674
1.1345e-89	0.287723	0.282	0.036	2.23042e-85	8	CLEC16A
3.26567e-89	0.399982	0.513	0.111	6.42031e-85	8	NFAT5
6.95905e-89	0.713208	0.639	0.176	1.36815e-84	8	LRP10
2.79667e-88	0.973998	0.765	0.305	5.49825e-84	8	ARL4A
6.63613e-88	0.765786	0.946	0.714	1.30466e-83	8	UBE2B
1.12589e-87	0.421084	0.401	0.072	2.2135e-83	8	COA4
2.18231e-87	0.29615	0.199	0.018	4.29041e-83	8	GRAMD1C
3.76972e-87	1.17185	0.657	0.203	7.41126e-83	8	ENSHGLG00000001023
4.32538e-87	0.345076	0.347	0.055	8.5037e-83	8	MOSPD1
6.11256e-87	0.954726	0.935	0.554	1.20173e-82	8	CTSA
8.06723e-87	0.339563	0.404	0.073	1.58602e-82	8	IVD
1.53531e-86	0.688823	0.744	0.266	3.01842e-82	8	EMB
3.6294e-86	0.599565	0.769	0.254	7.13539e-82	8	SPTBN2
2.08206e-85	0.558519	0.996	0.982	4.09334e-81	8	ENSHGLG00000004273
5.12744e-85	0.927671	0.838	0.412	1.00806e-80	8	CHIC2
6.03581e-85	0.507681	0.567	0.142	1.18664e-80	8	ENSHGLG00000018687
8.45594e-85	0.579965	0.61	0.167	1.66244e-80	8	ADIPOR2
1.24096e-84	0.910718	0.801	0.345	2.43973e-80	8	ELOVL1
2.34655e-84	0.796927	0.91	0.495	4.61331e-80	8	DDA1
3.83122e-84	1.02827	0.675	0.219	7.53217e-80	8	ENSHGLG00000009440
5.10244e-84	0.700749	0.726	0.248	1.00314e-79	8	EGR2
4.30525e-83	0.547885	0.635	0.188	8.46411e-79	8	ENSHGLG00000016607
6.10123e-83	0.272015	0.235	0.027	1.1995e-78	8	ENSHGLG00000007962
2.93844e-82	0.787552	0.859	0.446	5.77698e-78	8	USP5
4.39179e-82	0.608743	0.621	0.18	8.63426e-78	8	LIN7B
5.15002e-82	0.635605	0.697	0.222	1.01249e-77	8	RBP2
6.84076e-82	0.780938	0.765	0.303	1.34489e-77	8	AMOTL2
7.9107e-82	0.305757	0.365	0.063	1.55524e-77	8	ENSHGLG00000025832
2.72317e-81	0.746389	0.686	0.218	5.35374e-77	8	ENSHGLG00000002786
2.92071e-81	0.643351	1	0.993	5.74212e-77	8	S100A14
3.55363e-81	0.972388	0.921	0.631	6.98643e-77	8	PPP2CA
4.14805e-81	0.286251	0.245	0.03	8.15507e-77	8	IL25
4.05951e-80	0.588121	1	0.991	7.98099e-76	8	UBB
5.12184e-80	1.47364	0.682	0.239	1.00695e-75	8	ARID5B
7.47675e-80	0.781139	0.852	0.405	1.46993e-75	8	ENSHGLG00000009199
1.03706e-79	0.953386	0.939	0.761	2.03886e-75	8	XBP1
1.59738e-79	0.604117	0.711	0.238	3.14045e-75	8	THOP1
8.07645e-79	0.786418	0.921	0.681	1.58783e-74	8	BNIPL
2.4259e-78	0.584633	0.657	0.202	4.76933e-74	8	SEC61A1
1.60289e-77	0.618637	0.744	0.279	3.15129e-73	8	ENSHGLG00000015338
3.18315e-77	0.292091	0.412	0.081	6.25807e-73	8	ARNTL
8.59653e-77	0.774524	0.838	0.407	1.69008e-72	8	ENSHGLG00000004266
5.08682e-76	0.377319	0.329	0.056	1.00007e-71	8	FAM214B
2.06273e-75	0.543803	1	0.979	4.05532e-71	8	ENSHGLG00000031083
2.64919e-75	0.493674	0.552	0.149	5.20831e-71	8	CDKN2B
6.5397e-75	0.981378	0.834	0.508	1.28571e-70	8	TPRG1
1.40393e-74	0.398505	0.538	0.138	2.76012e-70	8	FURIN
2.94637e-74	0.431182	0.361	0.068	5.79257e-70	8	PRCP
7.15421e-74	0.389935	0.505	0.123	1.40652e-69	8	ENSHGLG00000014386
1.04517e-73	0.568454	0.628	0.196	2.05481e-69	8	TEAD4
1.59287e-73	0.708828	0.783	0.348	3.13158e-69	8	FDFT1
2.40185e-73	0.522073	0.379	0.075	4.72203e-69	8	GFOD2
3.32316e-73	1.33996	0.928	0.869	6.53334e-69	8	DAPL1
3.55928e-72	0.328112	0.404	0.084	6.99754e-68	8	SLC41A1
4.9488e-72	0.511801	0.581	0.169	9.72933e-68	8	ZRANB1
6.63327e-72	0.734818	0.69	0.254	1.3041e-67	8	FRMD6
1.84306e-71	0.797472	0.964	0.796	3.62345e-67	8	GLTP
5.38083e-71	0.703868	0.968	0.614	1.05787e-66	8	PIM1
2.31255e-70	0.916482	0.736	0.287	4.54647e-66	8	MAP2K3
3.18852e-70	0.403956	0.448	0.103	6.26864e-66	8	NGEF
2.4251e-69	0.399483	0.527	0.14	4.76775e-65	8	ENSHGLG00000011542
2.46292e-69	0.368935	0.462	0.111	4.8421e-65	8	APPL2
4.9872e-69	0.53399	0.542	0.152	9.80484e-65	8	TPP2
7.84775e-69	0.455199	0.639	0.2	1.54287e-64	8	PHLDB3
9.00487e-69	0.699085	0.791	0.358	1.77036e-64	8	ENSHGLG00000010028
1.78298e-68	0.350968	0.502	0.128	3.50533e-64	8	ENSHGLG00000006808
2.02903e-68	0.69689	0.921	0.603	3.98907e-64	8	INO80C
2.21391e-68	0.33256	0.437	0.1	4.35255e-64	8	WDR53
3.2373e-68	0.700367	0.733	0.293	6.36454e-64	8	UBE2H
3.26007e-68	0.439476	0.57	0.167	6.40929e-64	8	RPS6KB2
4.15623e-68	0.473696	0.552	0.161	8.17114e-64	8	MED8
4.61311e-68	0.382252	0.513	0.133	9.06937e-64	8	GAREM1
4.67092e-68	0.794107	0.906	0.755	9.18304e-64	8	ENSHGLG00000005396
1.16426e-67	0.293316	0.339	0.065	2.28894e-63	8	ENSHGLG00000030159
1.74809e-67	0.610959	0.83	0.373	3.43675e-63	8	SH3GL1
5.45874e-67	0.502854	0.632	0.209	1.07319e-62	8	PREP
1.20127e-66	0.698222	0.711	0.265	2.36169e-62	8	TCP11L2
1.51921e-66	0.541322	0.736	0.299	2.98676e-62	8	TMEM254
1.5963e-66	0.342258	0.473	0.117	3.13832e-62	8	SORBS3
2.14565e-66	0.817153	0.755	0.327	4.21834e-62	8	C16orf72
4.23886e-66	0.431531	0.588	0.174	8.33361e-62	8	SEMA4A
5.12036e-66	0.672543	0.877	0.53	1.00666e-61	8	ENSHGLG00000012473
7.43052e-66	0.455242	0.516	0.143	1.46084e-61	8	DNM2
2.31778e-65	0.441478	0.57	0.169	4.55675e-61	8	LPCAT4
2.79666e-65	0.272911	0.3	0.053	5.49824e-61	8	ADGRL2
3.35066e-65	0.26594	0.368	0.076	6.58741e-61	8	RANBP10
6.89125e-65	0.823703	0.928	0.651	1.35482e-60	8	ENSHGLG00000011088
7.73229e-64	0.286763	0.336	0.066	1.52017e-59	8	ENSHGLG00000013428
8.48504e-64	0.614014	0.953	0.802	1.66816e-59	8	ENSHGLG00000009529
1.66064e-63	0.652939	0.856	0.446	3.26481e-59	8	Ndrg2
1.76853e-63	0.398047	0.484	0.131	3.47693e-59	8	ENSHGLG00000016656
3.86428e-63	0.710499	0.866	0.51	7.59718e-59	8	PLD3
3.96963e-63	0.677157	0.946	0.635	7.8043e-59	8	CTNNBIP1
6.91327e-63	0.6737	0.819	0.39	1.35915e-58	8	GJB3
9.94944e-63	0.978234	0.848	0.833	1.95606e-58	8	ENSHGLG00000016632
1.88318e-62	0.566586	0.314	0.062	3.70233e-58	8	GDA
3.44313e-62	0.69644	0.755	0.34	6.76919e-58	8	DLX5
7.18263e-62	0.59998	0.996	0.96	1.41211e-57	8	HOMER2
8.31511e-62	0.373389	0.487	0.132	1.63475e-57	8	ENSHGLG00000018346
1.13048e-61	0.609027	0.917	0.7	2.22252e-57	8	ENSHGLG00000007489
1.71531e-61	1.31987	0.534	0.17	3.3723e-57	8	ENSHGLG00000003842
2.23777e-61	0.618609	0.809	0.384	4.39945e-57	8	DAAM1
2.32722e-61	0.76013	0.783	0.452	4.57532e-57	8	GPR87
2.34815e-61	0.300651	0.394	0.089	4.61647e-57	8	ARHGEF37
5.01028e-61	0.29464	0.347	0.073	9.85021e-57	8	ENSHGLG00000029452
1.35002e-60	0.256513	0.365	0.079	2.65414e-56	8	LRRC8E
1.96221e-60	0.639182	0.809	0.403	3.85771e-56	8	TMED3
2.0433e-60	0.373015	0.498	0.14	4.01712e-56	8	TLCD1
2.22703e-60	0.555489	0.617	0.208	4.37835e-56	8	IL34
2.23119e-60	0.661541	0.801	0.386	4.38651e-56	8	IFRD1
4.48793e-60	0.624238	0.949	0.777	8.82327e-56	8	ENSHGLG00000000744
5.47531e-60	0.326539	0.43	0.108	1.07645e-55	8	GGT6
5.71573e-59	0.308101	0.412	0.1	1.12371e-54	8	REL
7.2327e-59	0.457612	0.578	0.187	1.42195e-54	8	ENSHGLG00000008472
2.14959e-58	0.849259	0.899	0.633	4.22609e-54	8	ENSHGLG00000012398
5.20013e-58	0.316792	0.437	0.113	1.02235e-53	8	CERS3
8.2338e-58	0.676467	0.567	0.191	1.61876e-53	8	HSPB8
1.40299e-57	0.418671	1	0.982	2.75828e-53	8	DSTN
1.56655e-57	0.326538	0.448	0.119	3.07985e-53	8	C1QTNF4
1.97372e-57	0.722528	0.433	0.121	3.88033e-53	8	UACA
3.3715e-57	0.580866	0.928	0.708	6.62838e-53	8	TMEM50A
4.9437e-57	0.464572	0.574	0.194	9.71932e-53	8	UFD1
4.95326e-57	0.734133	0.765	0.39	9.73811e-53	8	ELOVL4
6.08727e-57	0.619174	0.888	0.602	1.19676e-52	8	ENSHGLG00000000853
1.1711e-56	0.489784	0.657	0.265	2.30238e-52	8	ACLY
1.21707e-56	0.453345	0.35	0.077	2.39276e-52	8	ENSHGLG00000021070
1.4209e-56	0.56653	0.783	0.385	2.79349e-52	8	ENSHGLG00000016273
1.42375e-56	0.74018	0.874	0.603	2.79909e-52	8	SH3YL1
2.06322e-56	0.680084	0.906	0.542	4.05628e-52	8	GOLGA7
2.3953e-56	0.565284	0.794	0.388	4.70917e-52	8	NIPA2
2.81225e-56	1.34765	0.44	0.126	5.52888e-52	8	ENSHGLG00000000065
2.92554e-56	0.592104	0.704	0.294	5.75162e-52	8	ENSHGLG00000012221
3.1763e-56	0.576334	0.744	0.364	6.24461e-52	8	ENSHGLG00000011888
1.05635e-55	0.844385	0.819	0.434	2.07678e-51	8	ENSHGLG00000014323
1.49823e-55	0.265847	0.375	0.089	2.94551e-51	8	ENSHGLG00000014502
1.63054e-55	0.474506	0.184	0.024	3.20564e-51	8	ARC
1.68853e-55	0.263638	0.347	0.078	3.31964e-51	8	AADACL2
2.07432e-55	0.29782	0.451	0.122	4.07811e-51	8	ARHGAP18
2.23667e-55	0.35863	0.455	0.124	4.3973e-51	8	PELI1
2.3889e-55	0.285561	0.408	0.103	4.69658e-51	8	ENSHGLG00000007938
2.49237e-55	0.397253	0.422	0.112	4.9e-51	8	ENSHGLG00000006357
3.12192e-55	0.263615	0.282	0.054	6.13769e-51	8	TUFT1
5.68017e-55	0.382619	0.523	0.164	1.11672e-50	8	BAG1
8.02274e-55	0.406065	0.603	0.213	1.57727e-50	8	ENSHGLG00000007600
8.40686e-55	0.485647	0.986	0.899	1.65279e-50	8	RBX1
2.98321e-54	0.26171	0.314	0.066	5.86499e-50	8	ENSHGLG00000000644
4.13928e-54	1.17097	0.935	0.737	8.13782e-50	8	ENSHGLG00000010832
4.20896e-54	0.617282	1	0.998	8.27481e-50	8	ENSHGLG00000003120
4.22753e-54	0.591844	0.682	0.289	8.31133e-50	8	EVPL
5.60137e-54	0.265374	0.379	0.092	1.10123e-49	8	SNRNP25
6.88317e-54	0.266169	0.448	0.121	1.35323e-49	8	PLEKHM2
7.83524e-54	0.480063	0.715	0.3	1.54041e-49	8	ENSHGLG00000011956
9.12119e-54	0.477062	0.477	0.142	1.79323e-49	8	RIC8A
1.02782e-53	0.645902	0.426	0.121	2.02069e-49	8	SUSD6
1.09418e-53	0.885819	0.856	0.586	2.15116e-49	8	Clu
1.43687e-53	0.580873	0.78	0.389	2.82489e-49	8	MRPS18A
1.70878e-53	0.456188	0.632	0.235	3.35946e-49	8	FUNDC2
2.9995e-53	0.385273	0.635	0.229	5.89701e-49	8	AURKAIP1
5.41695e-53	0.761486	0.881	0.58	1.06497e-48	8	ENSHGLG00000019355
8.48219e-53	0.577425	0.903	0.694	1.6676e-48	8	HSD17B10
1.09353e-52	0.4182	0.993	0.97	2.14988e-48	8	ENSHGLG00000013545
1.38851e-52	0.356969	0.426	0.119	2.72981e-48	8	TPRA1
1.91536e-52	0.497045	0.971	0.811	3.76561e-48	8	TUBB4B
2.19516e-52	0.733155	0.881	0.615	4.31569e-48	8	SERTAD1
2.4458e-52	0.406814	0.628	0.239	4.80845e-48	8	ENSHGLG00000013533
2.78299e-52	0.310916	0.336	0.077	5.47135e-48	8	ENSHGLG00000028694
3.87841e-52	0.342963	0.52	0.163	7.62495e-48	8	GAB1
4.62478e-52	0.315815	0.433	0.118	9.09231e-48	8	EMC9
4.79643e-52	0.25014	0.343	0.079	9.42978e-48	8	DENND2D
7.2532e-52	1.31571	0.534	0.196	1.42598e-47	8	ZFAND6
9.68357e-52	0.657464	0.52	0.171	1.90379e-47	8	ENSHGLG00000012657
1.14605e-51	0.688282	0.801	0.425	2.25313e-47	8	PDZK1IP1
3.83864e-51	0.465878	0.715	0.306	7.54676e-47	8	ENSHGLG00000008501
4.17492e-51	0.44732	0.545	0.188	8.2079e-47	8	GRPEL2
5.52688e-51	0.761293	0.769	0.348	1.08658e-46	8	GADD45B
7.066e-51	0.372064	0.48	0.148	1.38917e-46	8	ENSHGLG00000016988
8.47487e-51	0.440064	0.646	0.249	1.66616e-46	8	SCAMP3
1.25479e-50	0.391357	0.552	0.187	2.46691e-46	8	ENSHGLG00000005686
1.33642e-50	0.278157	0.448	0.126	2.6274e-46	8	AACS
2.56469e-50	0.362766	0.614	0.215	5.04218e-46	8	ARHGEF10L
4.16313e-50	0.359547	0.48	0.149	8.18472e-46	8	ENSHGLG00000008972
4.93495e-50	0.696434	0.668	0.292	9.7021e-46	8	PTP4A2
8.11326e-50	0.427125	0.549	0.187	1.59507e-45	8	MCFD2
1.04582e-49	1.32934	0.585	0.239	2.05608e-45	8	ENSHGLG00000017454
1.9202e-49	0.430874	0.675	0.268	3.77511e-45	8	ENSHGLG00000018813
2.24457e-49	0.537696	0.819	0.438	4.41282e-45	8	Glo1
2.78021e-49	0.406405	0.574	0.205	5.46589e-45	8	MYO1E
3.65712e-49	0.315616	0.48	0.144	7.1899e-45	8	N4BP3
4.14231e-49	0.554529	0.863	0.487	8.14378e-45	8	SUPT4H1
4.58326e-49	0.29607	0.274	0.057	9.01069e-45	8	SERINC3
4.65542e-49	0.52606	0.592	0.22	9.15255e-45	8	SLC48A1
1.07685e-48	0.521511	0.736	0.328	2.11708e-44	8	BCKDK
1.148e-48	0.257928	0.422	0.118	2.25697e-44	8	ENSHGLG00000012625
1.42507e-48	0.385215	0.563	0.199	2.80168e-44	8	CHD7
2.03986e-48	0.433834	0.729	0.324	4.01036e-44	8	PROM2
6.00832e-48	0.442431	0.653	0.266	1.18124e-43	8	ENSHGLG00000018975
6.69454e-48	0.651912	0.693	0.297	1.31615e-43	8	RAB24
9.30977e-48	0.50045	0.65	0.273	1.8303e-43	8	MBOAT2
1.88293e-47	0.687895	0.751	0.378	3.70184e-43	8	SNX9
3.10353e-47	0.251451	0.336	0.081	6.10153e-43	8	ENSHGLG00000018060
3.91238e-47	0.479877	0.708	0.33	7.69173e-43	8	ENSHGLG00000005783
4.89298e-47	1.06307	0.708	0.348	9.6196e-43	8	SCPEP1
7.10914e-47	0.418818	0.617	0.246	1.39766e-42	8	PHACTR4
1.16371e-46	0.371115	0.339	0.086	2.28785e-42	8	PLCG1
1.24338e-46	0.548198	0.874	0.661	2.44449e-42	8	MLF2
1.72261e-46	0.591233	0.968	0.942	3.38666e-42	8	SERPINB5
3.3759e-46	0.489736	0.307	0.073	6.63702e-42	8	AREG
4.81136e-46	0.40881	0.668	0.272	9.45914e-42	8	MARCH2
4.98934e-46	0.339973	0.527	0.18	9.80904e-42	8	PLPP2
5.26048e-46	0.308799	0.422	0.123	1.03421e-41	8	PSTPIP2
6.0225e-46	0.624407	0.863	0.587	1.18402e-41	8	CDKN1A
7.38472e-46	0.359568	0.462	0.149	1.45184e-41	8	LONP2
9.56206e-46	0.980375	0.903	0.755	1.8799e-41	8	DNAJB1
1.03492e-45	0.622369	0.697	0.323	2.03465e-41	8	ENSHGLG00000018564
1.05463e-45	0.51476	0.939	0.787	2.0734e-41	8	PKP3
1.11639e-45	0.275327	0.422	0.124	2.19483e-41	8	SMTN
1.42032e-45	0.280211	0.43	0.128	2.79235e-41	8	PRKCD
4.22445e-45	0.60086	0.903	0.596	8.30526e-41	8	DUSP5
4.44416e-45	0.392693	0.603	0.233	8.73723e-41	8	CDK2AP1
4.51319e-45	0.425466	0.592	0.229	8.87293e-41	8	ZNRF1
5.16793e-45	0.952084	0.834	0.498	1.01601e-40	8	ENSHGLG00000005038
5.18121e-45	0.433341	0.679	0.296	1.01863e-40	8	KANK1
1.08049e-44	0.432272	0.653	0.279	2.12424e-40	8	TIAM1
2.14518e-44	0.507489	0.679	0.326	4.21742e-40	8	ERBB3
2.47663e-44	0.372654	0.458	0.147	4.86905e-40	8	ENSHGLG00000001644
2.51488e-44	0.522047	0.913	0.602	4.94426e-40	8	PSMC3
2.78397e-44	0.609396	0.866	0.526	5.47329e-40	8	FAM129B
2.92953e-44	0.539367	0.989	0.979	5.75946e-40	8	ENSHGLG00000010018
3.07835e-44	0.493944	0.942	0.864	6.05203e-40	8	SLC25A5
4.62476e-44	0.394381	0.527	0.186	9.09227e-40	8	SLC31A2
4.95169e-44	0.68707	0.996	0.984	9.73503e-40	8	ENSHGLG00000000004
4.95443e-44	0.35721	0.422	0.131	9.74041e-40	8	ENSHGLG00000003388
7.26734e-44	0.333939	0.473	0.155	1.42876e-39	8	MAPRE3
1.09151e-43	0.454753	0.953	0.785	2.1459e-39	8	ENSHGLG00000000259
2.28362e-43	0.436092	0.527	0.19	4.4896e-39	8	ENSHGLG00000018214
2.9513e-43	0.744907	0.957	0.817	5.80226e-39	8	HSPA5
6.91528e-43	0.434845	0.69	0.323	1.35954e-38	8	UBA1
7.53239e-43	0.338976	0.495	0.169	1.48087e-38	8	ESRP2
8.4103e-43	0.530568	0.845	0.516	1.65346e-38	8	ENSHGLG00000019188
9.42986e-43	0.58318	0.57	0.23	1.85391e-38	8	WIPI2
1.43521e-42	0.437783	0.971	0.904	2.82163e-38	8	COX6C
1.44014e-42	0.56661	0.755	0.435	2.83131e-38	8	SLC25A25
2.02181e-42	0.465479	0.657	0.293	3.97488e-38	8	ENSHGLG00000009253
3.23111e-42	0.280991	0.397	0.117	6.35237e-38	8	RNF41
5.39641e-42	1.14179	0.744	0.436	1.06093e-37	8	SERPINB2
6.01747e-42	0.250744	0.401	0.119	1.18304e-37	8	BRD1
6.65483e-42	0.358121	0.614	0.243	1.30834e-37	8	ZFPL1
7.89106e-42	0.338361	0.365	0.105	1.55138e-37	8	BDKRB2
[truncated: 1,732 more rows]
