# Supplementary material for: Single-cell transcriptomics reveals age-resistant maintenance of cell identities, stem cell compartments and differentiation trajectories in long-lived naked mole-rats skin
Source: Aging (Albany NY). 2022 May 4;14(9):3728–56. doi: 10.18632/aging.204054 (PMC9134947; doi:10.18632/aging.204054)
Supplement: Supplementary Data File 2 [file aging-14-204054-s004.xlsx]

## Sheet: S2A. Marker genes Basal1
Supplementary Data File 2A. Differential expression analysis comparing metacluster basal1 subpopulations of naked mole-rat keratinocytes with all the other metaclusters : markers genes of metacluster basal 1.
Mouse genes used
Gene Symbol	Gene Name	Entrez GeneId
Igfbp6	insulin-like growth factor binding protein 6	16012
Rarres2	retinoic acid receptor responder (tazarotene induced) 2	71660
Igfbp3	insulin-like growth factor binding protein 3	16009
Tnc	tenascin C	21923
Igfbp2	insulin-like growth factor binding protein 2	16008
Bcam	basal cell adhesion molecule	57278
Krt14	keratin 14	16664
Dll1	delta like canonical Notch ligand 1	13388
Gem	GTP binding protein (gene overexpressed in skeletal muscle)	14579
Socs3	suppressor of cytokine signaling 3	12702
Serpinh1	serine (or cysteine) peptidase inhibitor, clade H, member 1	12406
Ascl2	achaete-scute family bHLH transcription factor 2	17173
S100a4	S100 calcium binding protein A4	20198
Moxd1	monooxygenase, DBH-like 1	59012
Sparc	secreted acidic cysteine rich glycoprotein	20692
Ramp1	receptor (calcitonin) activity modifying protein 1	51801
Thbs2	thrombospondin 2	21826
Nupr1	nuclear protein transcription regulator 1	56312
Krt5	keratin 5	110308
Crlf1	cytokine receptor-like factor 1	12931
Cpe	carboxypeptidase E	12876
Cyba	cytochrome b-245, alpha polypeptide	13057
Arhgdib	Rho, GDP dissociation inhibitor (GDI) beta	11857
Cav1	caveolin 1, caveolae protein	12389
Tgfbi	transforming growth factor, beta induced	21810
Fgfr2	fibroblast growth factor receptor 2	14183
Clu	clusterin	12759
Krt17	keratin 17	16667
Dst	dystonin	13518
Park7	Parkinson disease (autosomal recessive, early onset) 7	57320
Gapdh	glyceraldehyde-3-phosphate dehydrogenase	14433
Ehf	ets homologous factor	13661
S100a16	S100 calcium binding protein A16	67860
H2afj	H2A histone family, member J	232440
Ostf1	osteoclast stimulating factor 1	20409
Bnipl	BCL2/adenovirus E1B 19kD interacting protein like	171388
Pim3	proviral integration site 3	223775
Jup	junction plakoglobin	16480
Hspb1	heat shock protein 1	15507
Serinc2	serine incorporator 2	230779
Ndufc1	NADH:ubiquinone oxidoreductase subunit C1	66377
Cers2	ceramide synthase 2	76893
Emp2	epithelial membrane protein 2	13731
Mt4	metallothionein 4	17752
Dynll1	dynein light chain LC8-type 1	56455
Pkp1	plakophilin 1	18772
Tmem40	transmembrane protein 40	94346
Cldn1	claudin 1	12737
Mycbp2	MYC binding protein 2, E3 ubiquitin protein ligase	105689
Ptn	pleiotrophin	19242
Tuba4a	tubulin, alpha 4A	22145
Hopx	HOP homeobox	74318
Lgalsl	lectin, galactoside binding-like	216551
S100a14	S100 calcium binding protein A14	66166
Dsp	desmoplakin	109620
Them5	thioesterase superfamily member 5	66198
Endou	endonuclease, polyU-specific	19011
Sdr16c5	short chain dehydrogenase/reductase family 16C, member 5	242285
Rab25	RAB25, member RAS oncogene family	53868
Sh3yl1	Sh3 domain YSC-like 1	24057
Msmo1	methylsterol monoxygenase 1	66234
Ctnnbip1	catenin beta interacting protein 1	67087
Pdzk1ip1	PDZK1 interacting protein 1	67182
Sult2b1	sulfotransferase family, cytosolic, 2B, member 1	54200
Dapl1	death associated protein-like 1	76747
Rgcc	regulator of cell cycle	66214
Gltp	glycolipid transfer protein	56356
Lypd3	Ly6/Plaur domain containing 3	72434
Slurp1	secreted Ly6/Plaur domain containing 1	57277
Rhov	ras homolog family member V	228543
Krt1	keratin 1	16678
Sbsn	suprabasin	282619
Krtdap	keratinocyte differentiation associated protein	64661
Spink5	serine peptidase inhibitor, Kazal type 5	72432
Krt10	keratin 10	16661

## Sheet: S2B. BiNGO analysis Basal1
Supplementary Data File 2B. BiNGO Enrichment analysis using markers genes of metacluster basal 1 of naked mole-rat keratinocytes with all the other metaclusters.
ontology: namespace
curator: bingo
Selected ontology file : bundle://115.0:1/data/GO_Biological_Process
Selected annotation file : bundle://115.0:1/data/M_musculus_default
Discarded evidence codes :
Overrepresentation
Selected statistical test : Binomial test
Selected correction : Bonferroni Family-Wise Error Rate (FWER) correction
Selected significance level : 0.01
Testing option : Use whole annotation as reference set
The selected cluster :
GLTP	MOXD1	EHF	SPARC	TNC	LGALSL	HSPB1	MSMO1	PARK7	CLU	CLDN1	ENDOU	SDR16C5	H2AFJ	ARHGDIB	PIM3	OSTF1	DSP	KRTDAP	DST	IGFBP3	IGFBP2	CTNNBIP1	KRT1	SPINK5	TMEM40	CYBA	NDUFC1	EMP2	KRT5	DYNLL1	GEM	TUBA4A	SULT2B1	BCAM	PKP1	S100A4	NUPR1	RHOV	GAPDH	CERS2	DAPL1	MYCBP2	LYPD3	PTN	THBS2	SBSN	DLL1	ASCL2	SOCS3
No annotations were retrieved for the following entities:
RGCC	ARHGDIB	KRT1	LGALSL	MSMO1	EMP2	S100A4	KRT5	KRT10	CERS2
GO-ID	p-value	corr p-value	x	n	X	N	Description	Genes in test set
32502	8.5883E-10	8.0472E-7	25	2854	65	28954	developmental process	SPARC|DAPL1|MYCBP2|TNC|PTN|CLU|CLDN1|DLL1|ASCL2|SOCS3|DSP|KRTDAP|DST|JUP|IGFBP3|RARRES2|CAV1|CTNNBIP1|GEM|HOPX|KRT17|KRT14|GAPDH|CRLF1|FGFR2
9987	1.0923E-9	1.0235E-6	44	8928	65	28954	cellular process	MOXD1|EHF|SPARC|DAPL1|MYCBP2|TNC|LYPD3|PARK7|THBS2|CLU|CLDN1|DLL1|ASCL2|SOCS3|RAB25|H2AFJ|SERPINH1|PIM3|DSP|KRTDAP|DST|JUP|IGFBP3|RARRES2|CAV1|CYBA|NDUFC1|DYNLL1|MT4|GEM|TUBA4A|HOPX|SULT2B1|BCAM|KRT17|KRT14|PKP1|CPE|NUPR1|TGFBI|RAMP1|SERINC2|FGFR2|BNIPL
48856	4.2425E-9	3.9752E-6	22	2362	65	28954	anatomical structure development	DSP|KRTDAP|SPARC|DST|JUP|IGFBP3|CAV1|CTNNBIP1|MYCBP2|TNC|PTN|CLU|CLDN1|DLL1|ASCL2|GEM|HOPX|SOCS3|KRT17|KRT14|CRLF1|FGFR2
48731	4.6695E-9	4.3753E-6	21	2150	65	28954	system development	DSP|KRTDAP|SPARC|DST|JUP|IGFBP3|CAV1|CTNNBIP1|MYCBP2|TNC|PTN|CLU|CLDN1|DLL1|ASCL2|GEM|HOPX|SOCS3|KRT17|KRT14|FGFR2
7275	6.7869E-9	6.3593E-6	23	2659	65	28954	multicellular organismal development	DSP|KRTDAP|SPARC|DST|JUP|IGFBP3|CAV1|CTNNBIP1|MYCBP2|TNC|PTN|CLU|CLDN1|DLL1|ASCL2|GEM|HOPX|SOCS3|KRT17|KRT14|GAPDH|CRLF1|FGFR2
48513	1.2011E-7	1.1255E-4	17	1679	65	28954	organ development	DSP|KRTDAP|SPARC|JUP|CAV1|CTNNBIP1|TNC|PTN|CLU|DLL1|ASCL2|GEM|HOPX|SOCS3|KRT17|KRT14|FGFR2
32501	1.4537E-7	1.3621E-4	28	4552	65	28954	multicellular organismal process	SPARC|MYCBP2|TNC|PARK7|PTN|THBS2|CLU|CLDN1|DLL1|ASCL2|SOCS3|SERPINH1|DSP|KRTDAP|DST|JUP|IGFBP3|CAV1|CTNNBIP1|CYBA|MT4|GEM|HOPX|KRT17|KRT14|GAPDH|CRLF1|FGFR2
22610	3.7561E-7	3.5195E-4	10	543	65	28954	biological adhesion	DSP|BCAM|DST|JUP|TNC|PKP1|LYPD3|TGFBI|THBS2|CLDN1
7155	3.7561E-7	3.5195E-4	10	543	65	28954	cell adhesion	DSP|BCAM|DST|JUP|TNC|PKP1|LYPD3|TGFBI|THBS2|CLDN1
48519	4.4576E-7	4.1767E-4	16	1625	65	28954	negative regulation of biological process	DST|IGFBP3|CAV1|CTNNBIP1|SPINK5|CYBA|DYNLL1|THBS2|CLU|DLL1|ASCL2|GEM|HOPX|SOCS3|NUPR1|FGFR2
9888	4.9452E-7	4.6337E-4	11	708	65	28954	tissue development	DSP|KRTDAP|SOCS3|JUP|KRT17|CAV1|CTNNBIP1|KRT14|TNC|PTN|FGFR2
40008	6.7175E-7	6.2943E-4	8	322	65	28954	regulation of growth	SOCS3|KRT17|IGFBP3|IGFBP2|CYBA|IGFBP6|HOPX|FGFR2
30154	7.9125E-7	7.4140E-4	16	1697	65	28954	cell differentiation	KRTDAP|DST|DAPL1|IGFBP3|RARRES2|CAV1|MYCBP2|TNC|CLU|DLL1|ASCL2|HOPX|SOCS3|KRT17|KRT14|FGFR2
48869	1.0992E-6	1.0299E-3	16	1740	65	28954	cellular developmental process	KRTDAP|DST|DAPL1|IGFBP3|RARRES2|CAV1|MYCBP2|TNC|CLU|DLL1|ASCL2|HOPX|SOCS3|KRT17|KRT14|FGFR2
65007	1.4660E-6	1.3736E-3	34	7123	65	28954	biological regulation	EHF|SPARC|MYCBP2|TNC|PARK7|PTN|THBS2|CLU|CLDN1|DLL1|ASCL2|SOCS3|RAB25|IGFBP6|DST|IGFBP3|CAV1|IGFBP2|CTNNBIP1|SPINK5|CYBA|DYNLL1|MT4|GEM|HOPX|BCAM|KRT17|CPE|NUPR1|RHOV|RAMP1|SERINC2|FGFR2|BNIPL
48523	3.1302E-6	2.9330E-3	14	1441	65	28954	negative regulation of cellular process	DST|IGFBP3|CAV1|CTNNBIP1|SPINK5|DYNLL1|CLU|DLL1|ASCL2|GEM|HOPX|SOCS3|NUPR1|FGFR2
16043	5.7783E-6	5.4142E-3	16	1979	65	28954	cellular component organization	DSP|DST|JUP|CAV1|MYCBP2|TNC|CLU|GEM|TUBA4A|HOPX|KRT17|H2AFJ|SERPINH1|PIM3|TGFBI|FGFR2
[truncated: 25 more columns]

## Sheet: S2C. Marker genes Basal2
Supplementary Data File 2C. Differential expression analysis comparing metacluster basal2 subpopulations of naked mole-rat keratinocytes with all the other metaclusters : markers genes of metacluster basal 2.
Mouse genes used
Gene Symbol	Gene Name	Entrez GeneId
Ube2c	ubiquitin-conjugating enzyme E2C	68612
H2afv	H2A histone family, member V	77605
Ube2s	ubiquitin-conjugating enzyme E2S	77891
Birc5	baculoviral IAP repeat-containing 5	11799
Cdc20	cell division cycle 20	107995
H2afz	H2A histone family, member Z	51788
Cdkn3	cyclin-dependent kinase inhibitor 3	72391
Pttg1	pituitary tumor-transforming gene 1	30939
Stmn1	stathmin 1	16765
Tubb4b	tubulin, beta 4B class IVB	227613
Kif20b	kinesin family member 20B	240641
Cenpf	centromere protein F	108000
Cdca3	cell division cycle associated 3	14793
Top2a	topoisomerase (DNA) II alpha	21973
Ccnb2	cyclin B2	12442
Cks1b	CDC28 protein kinase 1b	54124
Aspm	abnormal spindle microtubule assembly	12316
Dut	deoxyuridine triphosphatase	110074
Arl6ip1	ADP-ribosylation factor-like 6 interacting protein 1	54208
Cenpa	centromere protein A	12615
Prc1	protein regulator of cytokinesis 1	233406
Smc2	structural maintenance of chromosomes 2	14211
Nuf2	NUF2, NDC80 kinetochore complex component	66977
Kif22	kinesin family member 22	110033
Pcna	proliferating cell nuclear antigen	18538
Spc25	SPC25, NDC80 kinetochore complex component, homolog (S. cerevisiae)	66442
Cenpw	centromere protein W	66311
Cks2	CDC28 protein kinase regulatory subunit 2	66197
Hmgb1	high mobility group box 1	15289
Cdca8	cell division cycle associated 8	52276
Spc24	SPC24, NDC80 kinetochore complex component, homolog (S. cerevisiae)	67629
Pbk	PDZ binding kinase	52033
Lmnb1	lamin B1	16906
Anln	anillin, actin binding protein	68743
Cmc2	COX assembly mitochondrial protein 2	66531
Ranbp1	RAN binding protein 1	19385
Hnrnpa2b1	heterogeneous nuclear ribonucleoprotein A2/B1	53379
Ran	RAN, member RAS oncogene family	19384
Ilf2	interleukin enhancer binding factor 2	67781
Rheb	Ras homolog enriched in brain	19744
Cenpk	centromere protein K	60411
Lsm6	LSM6 homolog, U6 small nuclear RNA and mRNA degradation associated	78651
Rad21	RAD21 cohesin complex component	19357
Pfn1	profilin 1	18643
Hsp90b1	heat shock protein 90, beta (Grp94), member 1	22027
Ptn	pleiotrophin	19242
Nrm	nurim (nuclear envelope membrane protein)	106582
Trip13	thyroid hormone receptor interactor 13	69716
Cenps	centromere protein S	69928
Dek	DEK oncogene (DNA binding)	110052
Nudc	nudC nuclear distribution protein	18221
Serinc2	serine incorporator 2	230779
Ehf	ets homologous factor	13661
Nfkbiz	nuclear factor of kappa light polypeptide gene enhancer in B cells inhibitor, zeta	80859
Msmo1	methylsterol monoxygenase 1	66234
Cltb	clathrin, light polypeptide (Lcb)	74325
Rab25	RAB25, member RAS oncogene family	53868
Gdpd2	glycerophosphodiester phosphodiesterase domain containing 2	71584
Ctnnbip1	catenin beta interacting protein 1	67087
Rora	RAR-related orphan receptor alpha	19883
Sh3yl1	Sh3 domain YSC-like 1	24057
Serpinb5	serine (or cysteine) peptidase inhibitor, clade B, member 5	20724
Hopx	HOP homeobox	74318
Lypd3	Ly6/Plaur domain containing 3	72434
Bnipl	BCL2/adenovirus E1B 19kD interacting protein like	171388
Dapl1	death associated protein-like 1	76747
Slurp1	secreted Ly6/Plaur domain containing 1	57277
Krt10	keratin 10	16661
Krtdap	keratinocyte differentiation associated protein	64661

## Sheet: S2D. BiNGO analysis Basal2
Supplementary Data file 2D. BiNGO Enrichment analysis using markers genes of metacluster basal 2 of naked mole-rat keratinocytes with all the other metaclusters.
ontology: namespace
curator: bingo
Selected ontology file : bundle://115.0:1/data/GO_Biological_Process
Selected annotation file : bundle://115.0:1/data/M_musculus_default
Discarded evidence codes :
Overrepresentation
Selected statistical test : Binomial test
Selected correction : Bonferroni Family-Wise Error Rate (FWER) correction
Selected significance level : 0.01
Testing option : Use whole annotation as reference set
The selected cluster :
TOP2A	EHF	ARL6IP1	NRM	CLTB	MSMO1	RORA	HMGB1	CKS1B	SMC2	LMNB1	CDC20	PTTG1	STMN1	NUF2	NFKBIZ	PBK	KRTDAP	NUDC	H2AFZ	CMC2	CTNNBIP1	H2AFV	KIF22	ILF2	SERPINB5	ASPM	CKS2	BIRC5	KIF20B	PFN1	PCNA	CDCA3	DAPL1	CDCA8	GDPD2	LYPD3	PTN	CENPA	HSP90B1	CCNB2	RAB25	RAD21	RANBP1	DUT	CENPW	UBE2C	DEK	KRT10	TUBB4B
No annotations were retrieved for the following entities:
DUT	H2AFZ	CMC2	MSMO1	KRT10	TUBB4B	LMNB1	CENPS
GO-ID	p-value	corr p-value	x	n	X	N	Description	Genes in test set
279	7.4127E-27	5.2482E-24	21	288	61	28958	M phase	RANBP1|NUDC|CDCA3|UBE2C|CDCA8|SMC2|CDC20|ASPM|CCNB2|ANLN|PTTG1|RAD21|STMN1|NUF2|CKS2|BIRC5|TRIP13|KIF20B|SPC24|RAN|SPC25
22402	6.3252E-26	4.4783E-23	22	383	61	28958	cell cycle process	RANBP1|NUDC|CDCA3|UBE2C|CDCA8|SMC2|CDC20|ASPM|CCNB2|ANLN|PTTG1|RAD21|STMN1|NUF2|CKS2|BIRC5|TRIP13|KIF20B|SPC24|RAN|CDKN3|SPC25
22403	8.9310E-26	6.3232E-23	21	325	61	28958	cell cycle phase	RANBP1|NUDC|CDCA3|UBE2C|CDCA8|SMC2|CDC20|ASPM|CCNB2|ANLN|PTTG1|RAD21|STMN1|NUF2|CKS2|BIRC5|TRIP13|KIF20B|SPC24|RAN|SPC25
51301	5.6702E-25	4.0145E-22	20	294	61	28958	cell division	TOP2A|NUDC|CDCA3|UBE2C|CDCA8|CKS1B|SMC2|CDC20|ASPM|CCNB2|ANLN|PTTG1|PRC1|RAD21|NUF2|BIRC5|KIF20B|SPC24|RAN|SPC25
7049	1.8237E-24	1.2912E-21	24	613	61	28958	cell cycle	RANBP1|NUDC|CDCA3|UBE2C|CDCA8|CKS1B|SMC2|CDC20|ASPM|CCNB2|ANLN|PTTG1|PRC1|RAD21|STMN1|NUF2|CKS2|BIRC5|TRIP13|KIF20B|SPC24|RAN|CDKN3|SPC25
278	2.3655E-23	1.6748E-20	18	236	61	28958	mitotic cell cycle	NUDC|CDCA3|UBE2C|CDCA8|SMC2|CDC20|ASPM|CCNB2|ANLN|PTTG1|RAD21|STMN1|NUF2|BIRC5|KIF20B|SPC24|RAN|SPC25
280	3.7662E-23	2.6665E-20	17	192	61	28958	nuclear division	NUDC|CDCA3|UBE2C|CDCA8|SMC2|CDC20|ASPM|CCNB2|ANLN|PTTG1|RAD21|NUF2|BIRC5|KIF20B|SPC24|RAN|SPC25
7067	3.7662E-23	2.6665E-20	17	192	61	28958	mitosis	NUDC|CDCA3|UBE2C|CDCA8|SMC2|CDC20|ASPM|CCNB2|ANLN|PTTG1|RAD21|NUF2|BIRC5|KIF20B|SPC24|RAN|SPC25
87	4.1080E-23	2.9085E-20	17	193	61	28958	M phase of mitotic cell cycle	NUDC|CDCA3|UBE2C|CDCA8|SMC2|CDC20|ASPM|CCNB2|ANLN|PTTG1|RAD21|NUF2|BIRC5|KIF20B|SPC24|RAN|SPC25
48285	5.3166E-23	3.7641E-20	17	196	61	28958	organelle fission	NUDC|CDCA3|UBE2C|CDCA8|SMC2|CDC20|ASPM|CCNB2|ANLN|PTTG1|RAD21|NUF2|BIRC5|KIF20B|SPC24|RAN|SPC25
6996	6.9549E-22	4.9241E-19	26	1026	61	28958	organelle organization	TOP2A|CDCA3|CDCA8|HMGB1|CENPA|SMC2|HSP90B1|CDC20|CCNB2|PTTG1|RAD21|STMN1|NUF2|RANBP1|NUDC|UBE2C|H2AFV|HOPX|ASPM|ANLN|BIRC5|KIF20B|PFN1|SPC24|RAN|SPC25
9987	1.8269E-18	1.2935E-15	52	8929	61	28958	cellular process	TOP2A|EHF|ARL6IP1|CLTB|RORA|HMGB1|CKS1B|SMC2|CDC20|PTTG1|STMN1|NUF2|NFKBIZ|PBK|KRTDAP|NUDC|H2AFV|KIF22|ILF2|SERPINB5|ASPM|CKS2|BIRC5|KIF20B|PFN1|PCNA|CDCA3|DAPL1|CDCA8|GDPD2|LYPD3|CENPA|HSP90B1|CCNB2|RAB25|RAD21|RANBP1|UBE2C|HOPX|ANLN|CENPF|LSM6|PRC1|RHEB|HNRNPA2B1|TRIP13|SERINC2|SPC24|RAN|CDKN3|SPC25|BNIPL
16043	5.3660E-16	3.7991E-13	27	1979	61	28958	cellular component organization	TOP2A|CDCA3|CDCA8|HMGB1|CENPA|SMC2|HSP90B1|CDC20|CCNB2|PTTG1|RAD21|STMN1|NUF2|RANBP1|NUDC|UBE2C|H2AFV|SERPINB5|HOPX|ASPM|ANLN|BIRC5|KIF20B|PFN1|SPC24|RAN|SPC25
7059	8.4233E-8	5.9637E-5	5	50	61	28958	chromosome segregation	TOP2A|PTTG1|RAD21|NUF2|BIRC5
71103	8.4161E-7	5.9586E-4	5	80	61	28958	DNA conformation change	TOP2A|H2AFV|HMGB1|CENPA|SMC2
7017	1.5039E-6	1.0647E-3	6	166	61	28958	microtubule-based process	RANBP1|STMN1|NUF2|BIRC5|KIF22|KIF20B
7010	3.0016E-6	2.1251E-3	7	294	61	28958	cytoskeleton organization	RANBP1|STMN1|NUF2|BIRC5|HMGB1|PFN1|HSP90B1
[truncated: 19 more columns]

## Sheet: S2E. Marker genes Intermediate1
Supplementary Data file 2E. Differential expression analysis comparing metacluster intermediate1 subpopulations of naked mole-rat keratinocytes with all the other metaclusters : markers genes of metacluster intermediate 1.
Mouse genes used
Gene Symbol	Gene Name	Entrez GeneId
Krt10	keratin 10	16661
Mt4	metallothionein 4	17752
Aqp3	aquaporin 3	11828
Socs3	suppressor of cytokine signaling 3	12702
Hopx	HOP homeobox	74318
Clu	clusterin	12759
Cpe	carboxypeptidase E	12876
Tubb4b	tubulin, beta 4B class IVB	227613
Rarres2	retinoic acid receptor responder (tazarotene induced) 2	71660
Igfbp6	insulin-like growth factor binding protein 6	16012

## Sheet: S2F. BiNGO analysis Interm1
Supplementary Data file 2F. BiNGO Enrichment analysis using markers genes of metacluster intermediate1 of naked mole-rat keratinocytes with all the other metaclusters.
ontology: namespace
curator: bingo
Selected ontology file : bundle://115.0:1/data/GO_Biological_Process
Selected annotation file : bundle://115.0:1/data/M_musculus_default
Discarded evidence codes :
Overrepresentation
Selected statistical test : Binomial test
Selected correction : Bonferroni Family-Wise Error Rate (FWER) correction
Selected significance level : 0.01
Testing option : Use whole annotation as reference set
The selected cluster :
SOCS3	RARRES2	CPE	KRT10	IGFBP6	MT4	TUBB4B	AQP3	CLU	HOPX
No annotations were retrieved for the following entities:
KRT10	TUBB4B
GO-ID	p-value	corr p-value	x	n	X	N	Description	Genes in test set
45597	3.8300E-5	9.6132E-3	3	258	8	28958	positive regulation of cell differentiation	SOCS3|CLU|HOPX

## Sheet: S2G. Marker genes Intermediate2
Supplementary Data file 2G. Differential expression analysis comparing metacluster intermediate2 subpopulations of naked mole-rat keratinocytes with all the other metaclusters : markers genes of metacluster intermediate 2.
Mouse genes used
Gene Symbol	Gene Name	Entrez GeneId
Spink5	serine peptidase inhibitor, Kazal type 5	72432
Clic3	chloride intracellular channel 3	69454
Cnfn	cornifelin	72383
Serpinb2	serine (or cysteine) peptidase inhibitor, clade B, member 2	18788
Lypd3	Ly6/Plaur domain containing 3	72434
Krtdap	keratinocyte differentiation associated protein	64661
Krt10	keratin 10	16661
Rgcc	regulator of cell cycle	66214
Krt1	keratin 1	16678
Slurp1	secreted Ly6/Plaur domain containing 1	57277
Dgat2	diacylglycerol O-acyltransferase 2	67800
Dapl1	death associated protein-like 1	76747
Elovl4	elongation of very long chain fatty acids (FEN1/Elo2, SUR4/Elo3, yeast)-like 4	83603
Sult2b1	sulfotransferase family, cytosolic, 2B, member 1	54200
Sh3yl1	Sh3 domain YSC-like 1	24057
Lgalsl	lectin, galactoside binding-like	216551
Grhl1	grainyhead like transcription factor 1	195733
Pdzk1ip1	PDZK1 interacting protein 1	67182
Itprid2	ITPR interacting domain containing 2	70599
Gltp	glycolipid transfer protein	56356
Sdr16c5	short chain dehydrogenase/reductase family 16C, member 5	242285
Ctnnbip1	catenin beta interacting protein 1	67087
Dsp	desmoplakin	109620
Sbsn	suprabasin	282619
Pkp1	plakophilin 1	18772
Pof1b	premature ovarian failure 1B	69693
Rhov	ras homolog family member V	228543
Rab25	RAB25, member RAS oncogene family	53868
Them5	thioesterase superfamily member 5	66198
Mycbp2	MYC binding protein 2, E3 ubiquitin protein ligase	105689
Msmo1	methylsterol monoxygenase 1	66234
Pim3	proviral integration site 3	223775
Cldn1	claudin 1	12737
Ndrg2	N-myc downstream regulated gene 2	29811
Rbp2	retinol binding protein 2, cellular	19660
Mboat2	membrane bound O-acyltransferase domain containing 2	67216
Serinc2	serine incorporator 2	230779
Tuba4a	tubulin, alpha 4A	22145
Mal2	mal, T cell differentiation protein 2	105853
Evpl	envoplakin	14027
Serpinb5	serine (or cysteine) peptidase inhibitor, clade B, member 5	20724
Bnipl	BCL2/adenovirus E1B 19kD interacting protein like	171388
Plk2	polo like kinase 2	20620
Sptssb	serine palmitoyltransferase, small subunit B	66183
Cers2	ceramide synthase 2	76893
Ovol1	ovo like zinc finger 1	18426
Ccdc12	coiled-coil domain containing 12	72654
Endou	endonuclease, polyU-specific	19011
Hopx	HOP homeobox	74318
Bpifc	BPI fold containing family C	270757
Btg2	B cell translocation gene 2, anti-proliferative	12227
Nectin4	nectin cell adhesion molecule 4	71740
Tmem45a	transmembrane protein 45a	56277
Cdkn1a	cyclin-dependent kinase inhibitor 1A (P21)	12575
Ehf	ets homologous factor	13661
Dynll1	dynein light chain LC8-type 1	56455
Hspb1	heat shock protein 1	15507
Zfp36l1	zinc finger protein 36, C3H type-like 1	12192
Dbndd2	dysbindin (dystrobrevin binding protein 1) domain containing 2	52840
Emp2	epithelial membrane protein 2	13731
Ostf1	osteoclast stimulating factor 1	20409
Fdft1	farnesyl diphosphate farnesyl transferase 1	14137
F3	coagulation factor III	14066
Klc3	kinesin light chain 3	232943
S100a14	S100 calcium binding protein A14	66166
Aox4	aldehyde oxidase 4	71872
Homer2	homer scaffolding protein 2	26557
Nfkbiz	nuclear factor of kappa light polypeptide gene enhancer in B cells inhibitor, zeta	80859
Rora	RAR-related orphan receptor alpha	19883
Cwh43	cell wall biogenesis 43 C-terminal homolog	231293
Tmem40	transmembrane protein 40	94346
Dusp5	dual specificity phosphatase 5	240672
Ndufc1	NADH:ubiquinone oxidoreductase subunit C1	66377
Nucb2	nucleobindin 2	53322
Jup	junction plakoglobin	16480
Txndc17	thioredoxin domain containing 17	52700
Eno1	enolase 1, alpha non-neuron	13806
Sdhb	succinate dehydrogenase complex, subunit B, iron sulfur (Ip)	67680
Tppp3	tubulin polymerization-promoting protein family member 3	67971
H2afz	H2A histone family, member Z	51788
Cpe	carboxypeptidase E	12876
Phgdh	3-phosphoglycerate dehydrogenase	236539
Mdh1	malate dehydrogenase 1, NAD (soluble)	17449
Cd81	CD81 antigen	12520
Dut	deoxyuridine triphosphatase	110074
Atp1a1	ATPase, Na+/K+ transporting, alpha 1 polypeptide	11928
Dst	dystonin	13518
H2afv	H2A histone family, member V	77605
Cks1b	CDC28 protein kinase 1b	54124
Park7	Parkinson disease (autosomal recessive, early onset) 7	57320
Socs3	suppressor of cytokine signaling 3	12702
Tgfbi	transforming growth factor, beta induced	21810
Cstb	cystatin B	13014
Gapdh	glyceraldehyde-3-phosphate dehydrogenase	14433
Nupr1	nuclear protein transcription regulator 1	56312
Moxd1	monooxygenase, DBH-like 1	59012
S100a4	S100 calcium binding protein A4	20198
Krt17	keratin 17	16667
Bcam	basal cell adhesion molecule	57278
Rarres2	retinoic acid receptor responder (tazarotene induced) 2	71660
Igfbp6	insulin-like growth factor binding protein 6	16012
Krt5	keratin 5	110308
Krt14	keratin 14	16664

## Sheet: S2H. BiNGO analysis Interm2
Supplementary Data file 2H. GO Enrichment analysis using markers genes of metacluster intermediate2 of naked mole-rat keratinocytes with all the other metaclusters.
ontology: namespace
curator: bingo
Selected ontology file : bundle://115.0:1/data/GO_Biological_Process
Selected annotation file : bundle://115.0:1/data/M_musculus_default
Discarded evidence codes :
Overrepresentation
Selected statistical test : Binomial test
Selected correction : Bonferroni Family-Wise Error Rate (FWER) correction
Selected significance level : 0.01
Testing option : Use whole annotation as reference set
The selected cluster :
GLTP	EHF	CD81	LGALSL	MSMO1	RORA	CWH43	ENO1	PARK7	CLDN1	TXNDC17	ENDOU	POF1B	PIM3	OSTF1	KRTDAP	DGAT2	SPINK5	KRT1	CTNNBIP1	KRT5	OVOL1	SDHB	TUBA4A	SULT2B1	BCAM	RBP2	PKP1	S100A4	NUPR1	MYCBP2	LYPD3	NDRG2	EVPL	ZFP36L1	SOCS3	KLC3	THEM5	S100A14	IGFBP6	FDFT1	ITPRID2	CCDC12	JUP	HOMER2	PLK2	RARRES2	CNFN	HOPX	RGCC
No annotations were retrieved for the following entities:
ITPRID2	DUT	H2AFZ	KRT1	LGALSL	MSMO1	EMP2	KRT5	KRT10	RGCC	POF1B	S100A4	SPTSSB	NECTIN4	BPIFC	CERS2
GO-ID	p-value	corr p-value	x	n	X	N	Description	Genes in test set
9987	1.2526E-10	9.9209E-8	56	8928	87	28955	cellular process	MOXD1|EHF|BTG2|CDKN1A|RORA|CWH43|PARK7|CLDN1|CKS1B|NFKBIZ|PIM3|PHGDH|KRTDAP|DSP|DUSP5|DGAT2|ELOVL4|DST|H2AFV|NDUFC1|OVOL1|DYNLL1|SDHB|TUBA4A|SERPINB5|SULT2B1|BCAM|RBP2|PKP1|NUPR1|DAPL1|MYCBP2|LYPD3|ATP1A1|NDRG2|EVPL|ZFP36L1|SOCS3|KLC3|RAB25|FDFT1|JUP|MDH1|PLK2|RARRES2|MBOAT2|CNFN|GRHL1|HOPX|KRT17|KRT14|CPE|TGFBI|SERINC2|NUCB2|BNIPL
8544	1.4906E-7	1.1806E-4	7	129	87	28955	epidermis development	KRTDAP|DSP|JUP|KRT17|OVOL1|CNFN|EVPL
7398	2.2279E-7	1.7645E-4	7	137	87	28955	ectoderm development	KRTDAP|DSP|JUP|KRT17|OVOL1|CNFN|EVPL
32502	6.5010E-7	5.1488E-4	25	2854	87	28955	developmental process	BTG2|DAPL1|MYCBP2|RORA|ENO1|NDRG2|CLDN1|EVPL|ZFP36L1|SOCS3|PHGDH|KRTDAP|DSP|JUP|DST|RARRES2|CTNNBIP1|OVOL1|CNFN|GRHL1|HOPX|SERPINB5|KRT17|KRT14|GAPDH
7275	2.5875E-6	2.0493E-3	23	2659	87	28955	multicellular organismal development	KRTDAP|DSP|BTG2|JUP|DST|CTNNBIP1|MYCBP2|RORA|ENO1|OVOL1|NDRG2|CNFN|GRHL1|CLDN1|EVPL|HOPX|SERPINB5|ZFP36L1|SOCS3|KRT17|KRT14|PHGDH|GAPDH
48731	4.6834E-6	3.7093E-3	20	2150	87	28955	system development	KRTDAP|DSP|BTG2|JUP|DST|CTNNBIP1|MYCBP2|RORA|OVOL1|NDRG2|CNFN|CLDN1|EVPL|HOPX|SERPINB5|ZFP36L1|SOCS3|KRT17|KRT14|PHGDH
9888	9.4477E-6	7.4826E-3	11	708	87	28955	tissue development	KRTDAP|DSP|SOCS3|JUP|KRT17|CTNNBIP1|KRT14|OVOL1|CNFN|EVPL|SERPINB5
[truncated: 53 more columns]

## Sheet: S2I. Marker genes Corneum
Supplementary Data file 2I. Differential expression analysis comparing metacluster corneum subpopulations of naked mole-rat keratinocytes with all the other metaclusters : markers genes of metacluster corneum.
Mouse genes used
Gene Symbol	Gene Name	Entrez GeneId
Lor	loricrin	16939
Cryab	crystallin, alpha B	12955
Sbsn	suprabasin	282619
Glrx	glutaredoxin	93692
Lypd2	Ly6/Plaur domain containing 2	68311
Serpina12	serine (or cysteine) peptidase inhibitor, clade A (alpha-1 antiproteinase, antitrypsin), member 12	68054
Cnfn	cornifelin	72383
Krt23	keratin 23	94179
Ly6g6c	lymphocyte antigen 6 complex, locus G6C	68468
Spink5	serine peptidase inhibitor, Kazal type 5	72432
Wfdc5	WAP four-disulfide core domain 5	209232
Anxa9	annexin A9	71790
Gabarapl2	gamma-aminobutyric acid (GABA) A receptor-associated protein-like 2	93739
Hopx	HOP homeobox	74318
Fam110a	family with sequence similarity 110, member A	73847
Msmo1	methylsterol monoxygenase 1	66234
Krt80	keratin 80	74127
Spink7	serine peptidase inhibitor, Kazal type 7 (putative)	408198
Spsb3	splA/ryanodine receptor domain and SOCS box containing 3	79043
Sult2b1	sulfotransferase family, cytosolic, 2B, member 1	54200
Rnf39	ring finger protein 39	386454
Id4	inhibitor of DNA binding 4	15904
Cysrt1	cysteine rich tail 1	67859
Dnase1l2	deoxyribonuclease 1-like 2	66705
Clic3	chloride intracellular channel 3	69454
Fam89a	family with sequence similarity 89, member A	69627
Map1lc3a	microtubule-associated protein 1 light chain 3 alpha	66734
Ppif	peptidylprolyl isomerase F (cyclophilin F)	105675
Ctsh	cathepsin H	13036
Ypel3	yippee like 3	66090
Trex2	three prime repair exonuclease 2	24102
Gdpd3	glycerophosphodiester phosphodiesterase domain containing 3	68616
Krtdap	keratinocyte differentiation associated protein	64661
Atp6v1c2	ATPase, H+ transporting, lysosomal V1 subunit C2	68775
R3hdm4	R3H domain containing 4	109284
Tmem45b	transmembrane protein 45b	235135
Dgat2	diacylglycerol O-acyltransferase 2	67800
Rgcc	regulator of cell cycle	66214
Degs2	delta(4)-desaturase, sphingolipid 2	70059
Zdhhc9	zinc finger, DHHC domain containing 9	208884
Cchcr1	coiled-coil alpha-helical rod protein 1	240084
Arid5b	AT rich interactive domain 5B (MRF1-like)	71371
Klk7	kallikrein related-peptidase 7 (chymotryptic, stratum corneum)	23993
Hspb1	heat shock protein 1	15507
Pof1b	premature ovarian failure 1B	69693
Ipo13	importin 13	230673
Klk8	kallikrein related-peptidase 8	259277
Cltb	clathrin, light polypeptide (Lcb)	74325
Abhd5	abhydrolase domain containing 5	67469
Rnf223	ring finger 223	100045778
Prdm1	PR domain containing 1, with ZNF domain	12142
Alox12b	arachidonate 12-lipoxygenase, 12R type	11686
Dapl1	death associated protein-like 1	76747
Tmem40	transmembrane protein 40	94346
Rnf227	ring finger protein 227	80515
Cers2	ceramide synthase 2	76893
Mid1ip1	Mid1 interacting protein 1 (gastrulation specific G12-like (zebrafish))	68041
Slc46a2	solute carrier family 46, member 2	30936
Elmod1	ELMO/CED-12 domain containing 1	270162
Gjb2	gap junction protein, beta 2	14619
Eps8l1	EPS8-like 1	67425
Ide	insulin degrading enzyme	15925
Sec14l1	SEC14-like lipid binding 1	74136
Tob1	transducer of ErbB-2.1	22057
Lgalsl	lectin, galactoside binding-like	216551
Myo6	myosin VI	17920
Cited2	Cbp/p300-interacting transactivator, with Glu/Asp-rich carboxy-terminal domain, 2	17684
Hmgcr	3-hydroxy-3-methylglutaryl-Coenzyme A reductase	15357
Tgm1	transglutaminase 1, K polypeptide	21816
Map3k8	mitogen-activated protein kinase kinase kinase 8	26410
Tuba4a	tubulin, alpha 4A	22145
Epn3	epsin 3	71889
Serpinb2	serine (or cysteine) peptidase inhibitor, clade B, member 2	18788
Rora	RAR-related orphan receptor alpha	19883
Sptssb	serine palmitoyltransferase, small subunit B	66183
Nectin4	nectin cell adhesion molecule 4	71740
Susd2	sushi domain containing 2	71733
Slc15a1	solute carrier family 15 (oligopeptide transporter), member 1	56643
Dbndd2	dysbindin (dystrobrevin binding protein 1) domain containing 2	52840
Hmgcs1	3-hydroxy-3-methylglutaryl-Coenzyme A synthase 1	208715
Ephx3	epoxide hydrolase 3	71932
Scpep1	serine carboxypeptidase 1	74617
Ndufa4	Ndufa4, mitochondrial complex associated	17992
Srpk1	serine/arginine-rich protein specific kinase 1	20815
Osbpl1a	oxysterol binding protein-like 1A	64291
Grhl1	grainyhead like transcription factor 1	195733
Dusp14	dual specificity phosphatase 14	56405
Kctd5	potassium channel tetramerisation domain containing 5	69259
Mzb1	marginal zone B and B1 cell-specific protein 1	69816
Dnajb1	DnaJ heat shock protein family (Hsp40) member B1	81489
Ugcg	UDP-glucose ceramide glucosyltransferase	22234
Arl4a	ADP-ribosylation factor-like 4A	11861
Ppp2ca	protein phosphatase 2 (formerly 2A), catalytic subunit, alpha isoform	19052
Ctsa	cathepsin A	19025
Xbp1	X-box binding protein 1	22433
Gng12	guanine nucleotide binding protein (G protein), gamma 12	14701
Chic2	cysteine-rich hydrophobic domain 2	74277
Stard5	StAR-related lipid transfer (START) domain containing 5	170460
Map2k3	mitogen-activated protein kinase kinase 3	26397
Xkrx	X-linked Kx blood group related, X-linked	331524
Elovl1	elongation of very long chain fatty acids (FEN1/Elo2, SUR4/Elo3, yeast)-like 1	54325
Gpr137b	G protein-coupled receptor 137B	83924
Tmem54	transmembrane protein 54	66260
Gpld1	glycosylphosphatidylinositol specific phospholipase D1	14756
Ovol1	ovo like zinc finger 1	18426
Prdx2	peroxiredoxin 2	21672
Rmnd5a	required for meiotic nuclear division 5 homolog A	68477
Clu	clusterin	12759
Itprid2	ITPR interacting domain containing 2	70599
Nop10	NOP10 ribonucleoprotein	66181
Bcl2l1	BCL2-like 1	12048
Smpdl3a	sphingomyelin phosphodiesterase, acid-like 3A	57319
S100a16	S100 calcium binding protein A16	67860
Abca12	ATP-binding cassette, sub-family A (ABC1), member 12	74591
Egr3	early growth response 3	13655
Stap2	signal transducing adaptor family member 2	106766
Bicdl2	BICD family like cargo adaptor 2	212733
Calcoco1	calcium binding and coiled coil domain 1	67488
Aloxe3	arachidonate lipoxygenase 3	23801
Usp7	ubiquitin specific peptidase 7	252870
Egln3	egl-9 family hypoxia-inducible factor 3	112407
Cars	cysteinyl-tRNA synthetase	27267
Gltp	glycolipid transfer protein	56356
Dda1	DET1 and DDB1 associated 1	66498
Usp5	ubiquitin specific peptidase 5 (isopeptidase T)	22225
Bnipl	BCL2/adenovirus E1B 19kD interacting protein like	171388
Slc30a1	solute carrier family 30 (zinc transporter), member 1	22782
Stub1	STIP1 homology and U-Box containing protein 1	56424
Amotl2	angiomotin-like 2	56332
Bpifc	BPI fold containing family C	270757
Ube2b	ubiquitin-conjugating enzyme E2B	22210
Gadd45b	growth arrest and DNA-damage-inducible 45 beta	17873
Gpr87	G protein-coupled receptor 87	84111
Egr1	early growth response 1	13653
Acsbg1	acyl-CoA synthetase bubblegum family member 1	94180
Hspa5	heat shock protein 5	14828
Sh3yl1	Sh3 domain YSC-like 1	24057
Frmd6	FERM domain containing 6	319710
Lypd5	Ly6/Plaur domain containing 5	76942
Elovl4	elongation of very long chain fatty acids (FEN1/Elo2, SUR4/Elo3, yeast)-like 4	83603
Sertad1	SERTA domain containing 1	55942
Fosb	FBJ osteosarcoma oncogene B	14282
Paqr5	progestin and adipoQ receptor family member V	74090
Herpud1	homocysteine-inducible, endoplasmic reticulum stress-inducible, ubiquitin-like domain member 1	64209
Lrp10	low-density lipoprotein receptor-related protein 10	65107
Fbxo30	F-box protein 30	71865
Opa1	OPA1, mitochondrial dynamin like GTPase	74143
Pld3	phospholipase D family, member 3	18807
Fdft1	farnesyl diphosphate farnesyl transferase 1	14137
Slc39a2	solute carrier family 39 (zinc transporter), member 2	214922
Pim1	proviral integration site 1	18712
Egr2	early growth response 2	13654
Ube2h	ubiquitin-conjugating enzyme E2H	22214
Tcp11l2	t-complex 11 (mouse) like 2	216198
Elovl7	ELOVL family member 7, elongation of long chain fatty acids (yeast)	74559
Ino80c	INO80 complex subunit C	225280
Dlx5	distal-less homeobox 5	13395
Ptp4a2	protein tyrosine phosphatase 4a2	19244
Gng13	guanine nucleotide binding protein (G protein), gamma 13	64337
Emb	embigin	13723
Pdzk1ip1	PDZK1 interacting protein 1	67182
Snx9	sorting nexin 9	66616
Creg1	cellular repressor of E1A-stimulated genes 1	433375
Mcoln1	mucolipin 1	94178
Pnpla2	patatin-like phospholipase domain containing 2	66853
Slc50a1	solute carrier family 50 (sugar transporter), member 1	19729
Sdr16c5	short chain dehydrogenase/reductase family 16C, member 5	242285
Golga7	golgi autoantigen, golgin subfamily a, 7	57437
Ctnnbip1	catenin beta interacting protein 1	67087
Gjb3	gap junction protein, beta 3	14620
Ifrd1	interferon-related developmental regulator 1	15982
Mpzl3	myelin protein zero-like 3	319742
Ndrg2	N-myc downstream regulated gene 2	29811
Rab24	RAB24, member RAS oncogene family	19336
S100a14	S100 calcium binding protein A14	66166
Cpeb4	cytoplasmic polyadenylation element binding protein 4	67579
Tmed3	transmembrane p24 trafficking protein 3	66111
Ostf1	osteoclast stimulating factor 1	20409
Rbp2	retinol binding protein 2, cellular	19660
Cdkn1a	cyclin-dependent kinase inhibitor 1A (P21)	12575
Cdc42ep3	CDC42 effector protein (Rho GTPase binding) 3	260409
Daam1	dishevelled associated activator of morphogenesis 1	208846
Sh3gl1	SH3-domain GRB2-like 1	20405
Fam129b	family with sequence similarity 129, member B	227737
Lin7b	lin-7 homolog B (C. elegans)	22342
Thop1	thimet oligopeptidase 1	50492
Slc16a1	solute carrier family 16 (monocarboxylic acid transporters), member 1	20501
Dusp5	dual specificity phosphatase 5	240672
Homer2	homer scaffolding protein 2	26557
Sptbn2	spectrin beta, non-erythrocytic 2	20743
Evpl	envoplakin	14027
Serpinb5	serine (or cysteine) peptidase inhibitor, clade B, member 5	20724
Ubb	ubiquitin B	22187
Sec61a1	Sec61 alpha 1 subunit (S. cerevisiae)	53421
Mrps18a	mitochondrial ribosomal protein S18A	68565
Tmem50a	transmembrane protein 50A	71817
Eif1	eukaryotic translation initiation factor 1	20918
Adipor2	adiponectin receptor 2	68465
Hsd17b10	hydroxysteroid (17-beta) dehydrogenase 10	15108
Hectd1	HECT domain E3 ubiquitin protein ligase 1	207304
Tead4	TEA domain family member 4	21679
Dedd2	death effector domain-containing DNA binding protein 2	67379
Slc25a25	solute carrier family 25 (mitochondrial carrier, phosphate carrier), member 25	227731
Nipa2	non imprinted in Prader-Willi/Angelman syndrome 2 homolog (human)	93790
Lrrn4cl	LRRN4 C-terminal like	68852
Prrg2	proline-rich Gla (G-carboxyglutamic acid) polypeptide 2	65116
Il34	interleukin 34	76527
Mlf2	myeloid leukemia factor 2	30853
Ddit4	DNA-damage-inducible transcript 4	74747
Glo1	glyoxalase 1	109801
Btg2	B cell translocation gene 2, anti-proliferative	12227
Mycbp2	MYC binding protein 2, E3 ubiquitin protein ligase	105689
Arpc5l	actin related protein 2/3 complex, subunit 5-like	74192
Dnajb9	DnaJ heat shock protein family (Hsp40) member B9	27362
Psmc3	proteasome (prosome, macropain) 26S subunit, ATPase 3	19182
Bckdk	branched chain ketoacid dehydrogenase kinase	12041
Pkp3	plakophilin 3	56460
Lmo4	LIM domain only 4	16911
Chchd1	coiled-coil-helix-coiled-coil-helix domain containing 1	66121
Erbb3	erb-b2 receptor tyrosine kinase 3	13867
Slc9a3r1	solute carrier family 9 (sodium/hydrogen exchanger), member 3 regulator 1	26941
Prep	prolyl endopeptidase	19072
Mboat2	membrane bound O-acyltransferase domain containing 2	67216
Tsc22d3	TSC22 domain family, member 3	14605
P4hb	prolyl 4-hydroxylase, beta polypeptide	18453
Rnase4	ribonuclease, RNase A family 4	58809
Rpl23	ribosomal protein L23	65019
Ktn1	kinectin 1	16709
Txndc17	thioredoxin domain containing 17	52700
Tma7	translational machinery associated 7	66167
Rpl26	ribosomal protein L26	19941
Eif3g	eukaryotic translation initiation factor 3, subunit G	53356
Pla2g12a	phospholipase A2, group XIIA	66350
Rpl37a	ribosomal protein L37a	19981
Smpd2	sphingomyelin phosphodiesterase 2, neutral	20598
Snrpe	small nuclear ribonucleoprotein E	20643
Psme2	proteasome (prosome, macropain) activator subunit 2 (PA28 beta)	19188
Rpl15	ribosomal protein L15	66480
Hmgb1	high mobility group box 1	15289
Rpl10a	ribosomal protein L10A	19896
Rpl13a	ribosomal protein L13A	22121
Exosc5	exosome component 5	27998
Gdpd2	glycerophosphodiester phosphodiesterase domain containing 2	71584
Cox7a2l	cytochrome c oxidase subunit 7A2 like	20463
Rpl34	ribosomal protein L34	68436
Ehd2	EH-domain containing 2	259300
Mgst1	microsomal glutathione S-transferase 1	56615
Eef1g	eukaryotic translation elongation factor 1 gamma	67160
Fkbp9	FK506 binding protein 9	27055
Rpl24	ribosomal protein L24	68193
Hmga1	high mobility group AT-hook 1	15361
Aprt	adenine phosphoribosyl transferase	11821
Rpl18a	ribosomal protein L18A	76808
Rps21	ribosomal protein S21	66481
Rps11	ribosomal protein S11	27207
Nme2	NME/NM23 nucleoside diphosphate kinase 2	18103
Rps17	ribosomal protein S17	20068
Rpl35	ribosomal protein L35	66489
Ddx21	DEAD (Asp-Glu-Ala-Asp) box polypeptide 21	56200
Fth1	ferritin heavy polypeptide 1	14319
Rps15	ribosomal protein S15	20054
Rpl7l1	ribosomal protein L7-like 1	66229
Cd63	CD63 antigen	12512
Gstm2	glutathione S-transferase, mu 2	14863
Rpl37	ribosomal protein L37	67281
Pcbp2	poly(rC) binding protein 2	18521
Rpl13	ribosomal protein L13	270106
C1qbp	complement component 1, q subcomponent binding protein	12261
Sdhb	succinate dehydrogenase complex, subunit B, iron sulfur (Ip)	67680
Rps27l	ribosomal protein S27-like	67941
Dut	deoxyuridine triphosphatase	110074
Mdh1	malate dehydrogenase 1, NAD (soluble)	17449
Rps27	ribosomal protein S27	57294
Nr4a1	nuclear receptor subfamily 4, group A, member 1	15370
Park7	Parkinson disease (autosomal recessive, early onset) 7	57320
Kcnk1	potassium channel, subfamily K, member 1	16525
Ccnd1	cyclin D1	12443
Rps6	ribosomal protein S6	20104
Mrpl10	mitochondrial ribosomal protein L10	107732
Arl6ip5	ADP-ribosylation factor-like 6 interacting protein 5	65106
Ranbp1	RAN binding protein 1	19385
Npm3	nucleoplasmin 3	18150
Rps9	ribosomal protein S9	76846
Id3	inhibitor of DNA binding 3	15903
Rplp2	ribosomal protein, large P2	67186
Rps19	ribosomal protein S19	20085
Rpl8	ribosomal protein L8	26961
Eef2	eukaryotic translation elongation factor 2	13629
Ssr2	signal sequence receptor, beta	66256
Rpl21	ribosomal protein L21	19933
Anxa5	annexin A5	11747
Cd81	CD81 antigen	12520
Rpl11	ribosomal protein L11	67025
Rpl27	ribosomal protein L27	19942
Rps26	ribosomal protein S26	27370
Rps3	ribosomal protein S3	27050
Sod1	superoxide dismutase 1, soluble	20655
Rps7	ribosomal protein S7	20115
Rpl12	ribosomal protein L12	269261
Cks1b	CDC28 protein kinase 1b	54124
Rps15a	ribosomal protein S15A	267019
Rps28	ribosomal protein S28	54127
Sat1	spermidine/spermine N1-acetyl transferase 1	20229
Hnrnpa2b1	heterogeneous nuclear ribonucleoprotein A2/B1	53379
Ndufs8	NADH:ubiquinone oxidoreductase core subunit S8	225887
Atp1a1	ATPase, Na+/K+ transporting, alpha 1 polypeptide	11928
Cd44	CD44 antigen	12505
Mgst3	microsomal glutathione S-transferase 3	66447
Tppp3	tubulin polymerization-promoting protein family member 3	67971
Rack1	receptor for activated C kinase 1	14694
H2afv	H2A histone family, member V	77605
Tgfbi	transforming growth factor, beta induced	21810
Rpl3	ribosomal protein L3	27367
Cd9	CD9 antigen	12527
Sh3bgrl3	SH3 domain binding glutamic acid-rich protein-like 3	73723
Eef1b2	eukaryotic translation elongation factor 1 beta 2	55949
Eno1	enolase 1, alpha non-neuron	13806
Eef1a1	eukaryotic translation elongation factor 1 alpha 1	13627
Ly6d	lymphocyte antigen 6 complex, locus D	17068
Rpl22l1	ribosomal protein L22 like 1	68028
Mif	macrophage migration inhibitory factor (glycosylation-inhibiting factor)	17319
Pfn1	profilin 1	18643
Socs3	suppressor of cytokine signaling 3	12702
Prdx6	peroxiredoxin 6	11758
Plp2	proteolipid protein 2	18824
Myc	myelocytomatosis oncogene	17869
Lgals7	lectin, galactose binding, soluble 7	16858
Krt17	keratin 17	16667
Bcam	basal cell adhesion molecule	57278
Lgals3	lectin, galactose binding, soluble 3	16854
S100a4	S100 calcium binding protein A4	20198
Anxa1	annexin A1	16952
Mt4	metallothionein 4	17752
Dst	dystonin	13518
Gapdh	glyceraldehyde-3-phosphate dehydrogenase	14433
Aqp3	aquaporin 3	11828
Cstb	cystatin B	13014
Krt5	keratin 5	110308
Krt14	keratin 14	16664

## Sheet: S2J. BiNGO analysis Corneum
Supplementary Data file 2J. GO Enrichment analysis using markers genes of metacluster corneum of naked mole-rat keratinocytes with all the other metaclusters.
ontology: namespace
curator: bingo
Selected ontology file : bundle://115.0:1/data/GO_Biological_Process
Selected annotation file : bundle://115.0:1/data/M_musculus_default
Discarded evidence codes :
Overrepresentation
Selected statistical test : Binomial test
Selected correction : Bonferroni Family-Wise Error Rate (FWER) correction
Selected significance level : 0.01
Testing option : Use whole annotation as reference set
The selected cluster :
IPO13	GLTP	CHIC2	SLC46A2	RPL3	FAM89A	RPL34	LGALSL	ARPC5L	PREP	ENO1	ABCA12	RPL8	AQP3	TXNDC17	FAM110A	RPS15	LGALS3	RPS17	POF1B	RPL18A	RPS19	FTH1	MYC	ARL6IP5	RPL35	RPL37	RPS11	GOLGA7	LGALS7	KRTDAP	GABARAPL2	STARD5	RPL21	PAQR5	RPL23	IFRD1	MRPS18A	RNASE4	MIF	KRT5	OVOL1	SULT2B1	COX7A2L	BCAM	RBP2	DAAM1	DDIT4	PSME2	RPL24
SOCS3	UBB	STAP2	ITPRID2	UBE2H	UBE2B	HSPA5	HMGA1	EPHX3	EEF2	MT4	HOPX	FBXO30	NR4A1	RGCC	AMOTL2	DEGS2	TGFBI	OSBPL1A	LRP10	NOP10	BCL2L1	TMEM45B	CALCOCO1	HSPB1	HMGB1	DUSP14	CKS1B	SCPEP1	SDR16C5	SEC61A1	OPA1	PLA2G12A	HMGCS1	DST	RPL13A	H2AFV	EPN3	EEF1G	PTP4A2	ARL4A	NDUFS8	RPL37A	SMPDL3A	THOP1	GAPDH	CERS2	KRT80	DAPL1	DDX21
No annotations were retrieved for the following entities:
KRT80	LGALSL	BICDL2	MSMO1	CYSRT1	POF1B	C1QBP	PCBP2	RNF39	SPTSSB	STAP2	SPTBN2	ITPRID2	DUT	TMEM50A	TMA7	KRT5	SLC50A1	MLF2	RNF223	COX7A2L	RPS27	RGCC	RNF227	MZB1	R3HDM4	S100A4	PLP2	NECTIN4	BPIFC	CPEB4	CERS2
GO-ID	p-value	corr p-value	x	n	X	N	Description	Genes in test set
9987	2.8676E-40	5.3194E-37	208	8921	307	28943	cellular process	IPO13|CHIC2|SLC46A2|RPL8|AQP3|RPS15|LGALS3|RPS17|RPL18A|RPS19|FTH1|MYC|RPL37|RPS11|GOLGA7|LGALS7|KRTDAP|GABARAPL2|PAQR5|RPL23|IFRD1|MRPS18A|MIF|OVOL1|SULT2B1|BCAM|RBP2|DAAM1|DDIT4|RPL24|RPL26|PFN1|GPLD1|MYCBP2|MGST1|KLK8|EVPL|MRPL10|DEDD2|UGCG|PRDX2|MYO6|SNX9|ATP6V1C2|FDFT1|EGR1|XBP1|EGR2|EGR3|GADD45B|TREX2|CNFN|PRDX6|SRPK1|EIF1|EHD2|GJB2|GJB3|ID4|ID3|RPS21|CDKN1A|BTG2|CITED2|CLTB|IDE|DDA1|HERPUD…
8152	5.1726E-26	9.5952E-23	153	6465	307	28943	metabolic process	CARS|PREP|RORA|ENO1|PRDM1|PARK7|RPL8|SAT1|RPS15|TGM1|EEF1B2|RPS17|RPL18A|RPS19|CCND1|FTH1|MYC|PIM1|MAP3K8|RPL37|RPS11|MAP2K3|USP7|RPS9|STARD5|DGAT2|USP5|RPS7|LMO4|RPL23|RPS6|MRPS18A|ARID5B|MIF|OVOL1|SDHB|LOR|SULT2B1|EEF1A1|RBP2|RPL7L1|PPIF|RPL24|SNRPE|RPL26|FKBP9|GPLD1|DLX5|MGST3|GLO1|MYCBP2|MGST1|ABHD5|KLK8|ADIPOR2|KLK7|PLD3|DEDD2|UGCG|PRDX2|ATP6V1C2|FDFT1|CTSA|EGR1|XBP1|EGR2|GSTM2|UBE2H|EGR3|GA…
44237	5.5010E-23	1.0204E-19	132	5368	307	28943	cellular metabolic process	CARS|RORA|PRDM1|PARK7|RPL8|SAT1|RPS15|TGM1|EEF1B2|RPS17|RPL18A|RPS19|CCND1|MYC|PIM1|MAP3K8|RPL37|RPS11|MAP2K3|USP7|RPS9|DGAT2|USP5|RPS7|LMO4|RPL23|RPS6|MRPS18A|ARID5B|OVOL1|SDHB|LOR|SULT2B1|EEF1A1|RBP2|RPL7L1|PPIF|RPL24|SNRPE|RPL26|FKBP9|GPLD1|DLX5|GLO1|MYCBP2|MGST1|ABHD5|ADIPOR2|DEDD2|UGCG|PRDX2|ATP6V1C2|FDFT1|EGR1|XBP1|EGR2|UBE2H|EGR3|GADD45B|UBE2B|HSPA5|TREX2|EEF2|PRDX6|HOPX|FBXO30|SRPK1|EIF1|…
44238	5.8241E-23	1.0804E-19	135	5582	307	28943	primary metabolic process	CARS|PREP|RORA|PRDM1|RPL8|SAT1|RPS15|TGM1|EEF1B2|RPS17|RPL18A|RPS19|CCND1|MYC|PIM1|MAP3K8|RPL37|RPS11|MAP2K3|USP7|RPS9|STARD5|DGAT2|USP5|RPS7|LMO4|RPL23|RPS6|MRPS18A|ARID5B|OVOL1|LOR|SULT2B1|EEF1A1|RBP2|RPL7L1|PPIF|RPL24|SNRPE|RPL26|FKBP9|GPLD1|DLX5|GLO1|MYCBP2|MGST1|ABHD5|KLK8|ADIPOR2|KLK7|PLD3|DEDD2|UGCG|PRDX2|ATP6V1C2|FDFT1|CTSA|EGR1|XBP1|EGR2|UBE2H|EGR3|GADD45B|UBE2B|HSPA5|TREX2|EEF2|MT4|HOPX…
6412	1.7636E-19	3.2715E-16	28	260	307	28943	translation	CARS|RPL11|RPS27L|RPL8|RPS15|EEF1B2|RPS17|RPS15A|RPL18A|RPS19|RPS3|RPLP2|RPL37|RPS11|RPS9|RPS7|RPL23|MRPS18A|EEF2|EIF1|EEF1A1|EEF1G|RPL7L1|EIF3G|RPL24|RPL22L1|RPL26|RPS21
19538	2.5203E-16	4.6751E-13	68	2131	307	28943	protein metabolic process	CARS|BTG2|PREP|IDE|RPL8|DUSP14|RPS15|TGM1|EEF1B2|SCPEP1|RPS17|RPL18A|RPS19|CCND1|MYC|PIM1|CTSH|RPLP2|MAP3K8|RPL37|RPS11|MAP2K3|USP7|RPS9|USP5|RPS7|RPL23|MRPS18A|EEF1A1|EEF1G|PTP4A2|RPL7L1|PPIF|RPL24|RPL26|FKBP9|CRYAB|THOP1|RPL11|RPS27L|KLK8|KLK7|PPP2CA|PRDX2|DNAJB1|RPS15A|ERBB3|RPS3|DNAJB9|CTSA|UBE2H|GADD45B|UBE2B|HSPA5|EEF2|MT4|HOPX|FBXO30|SRPK1|EIF1|SOD1|BCKDK|PSMC3|EIF3G|RPL22L1|STUB1|P4HB|RPS…
44267	1.6664E-15	3.0912E-12	58	1669	307	28943	cellular protein metabolic process	CARS|BTG2|IDE|RPL8|DUSP14|RPS15|TGM1|EEF1B2|RPS17|RPL18A|RPS19|CCND1|PIM1|RPLP2|MAP3K8|RPL37|RPS11|MAP2K3|USP7|RPS9|USP5|RPS7|RPL23|MRPS18A|EEF1A1|EEF1G|PTP4A2|RPL7L1|PPIF|RPL24|RPL26|FKBP9|CRYAB|RPL11|RPS27L|PPP2CA|PRDX2|DNAJB1|RPS15A|ERBB3|RPS3|DNAJB9|UBE2H|GADD45B|UBE2B|HSPA5|EEF2|HOPX|FBXO30|SRPK1|EIF1|SOD1|BCKDK|EIF3G|RPL22L1|STUB1|P4HB|RPS21
43170	1.1529E-12	2.1386E-9	96	4396	307	28943	macromolecule metabolic process	CARS|BTG2|CALCOCO1|PREP|RORA|IDE|PRDM1|RPL8|DUSP14|RPS15|TGM1|EEF1B2|SCPEP1|RPS17|RPL18A|RPS19|CCND1|MYC|PIM1|CTSH|RPLP2|MAP3K8|RPL37|EMB|RPS11|TEAD4|MAP2K3|USP7|RPS9|USP5|RPS7|LMO4|RPL23|RPS6|MRPS18A|ARID5B|OVOL1|EEF1A1|EEF1G|PTP4A2|RPL7L1|PPIF|RPL24|SNRPE|RPL26|FKBP9|DNASE1L2|CRYAB|THOP1|DLX5|MYCBP2|RPL11|RPS27L|KLK8|HSD17B10|KLK7|DEDD2|PPP2CA|PRDX2|DNAJB1|EXOSC5|RPS15A|SERTAD1|ERBB3|RPS3|DNAJB…
9058	2.7253E-12	5.0554E-9	71	2781	307	28943	biosynthetic process	CARS|BTG2|CALCOCO1|RORA|PRDM1|RPL8|RPS15|EEF1B2|SMPD2|RPS17|RPL18A|RPS19|MYC|RPLP2|RPL37|EMB|RPS11|TEAD4|ELOVL1|RPS9|STARD5|DGAT2|ELOVL4|RPS7|HMGCS1|LMO4|RPL23|NME2|MRPS18A|ARID5B|ELOVL7|OVOL1|APRT|EEF1A1|EEF1G|RPL7L1|RPL24|RPL26|DLX5|MYCBP2|RPL11|RPS27L|ALOX12B|ABHD5|HMGCR|ATP1A1|DEDD2|UGCG|RPS15A|SERTAD1|RPS3|ALOXE3|ATP6V1C2|FDFT1|EGR1|XBP1|EGR2|EGR3|MBOAT2|GRHL1|NPM3|EEF2|HOPX|EIF1|SOD1|NR4A1|…
44249	4.9722E-12	9.2234E-9	69	2691	307	28943	cellular biosynthetic process	CARS|BTG2|CALCOCO1|RORA|PRDM1|RPL8|RPS15|EEF1B2|SMPD2|RPS17|RPL18A|RPS19|MYC|RPLP2|RPL37|EMB|RPS11|TEAD4|ELOVL1|RPS9|DGAT2|ELOVL4|RPS7|HMGCS1|LMO4|RPL23|NME2|MRPS18A|ARID5B|ELOVL7|OVOL1|APRT|EEF1A1|EEF1G|RPL7L1|RPL24|RPL26|DLX5|MYCBP2|RPL11|RPS27L|ALOX12B|ABHD5|HMGCR|ATP1A1|DEDD2|RPS15A|SERTAD1|RPS3|ALOXE3|ATP6V1C2|FDFT1|EGR1|XBP1|EGR2|EGR3|MBOAT2|GRHL1|NPM3|EEF2|HOPX|EIF1|SOD1|NR4A1|EIF3G|FOSB|R…
44260	6.7407E-12	1.2504E-8	87	3899	307	28943	cellular macromolecule metabolic process	CARS|BTG2|CALCOCO1|RORA|IDE|PRDM1|RPL8|DUSP14|RPS15|TGM1|EEF1B2|RPS17|RPL18A|RPS19|CCND1|MYC|PIM1|RPLP2|MAP3K8|RPL37|EMB|RPS11|TEAD4|MAP2K3|USP7|RPS9|USP5|RPS7|LMO4|RPL23|RPS6|MRPS18A|ARID5B|OVOL1|EEF1A1|EEF1G|PTP4A2|RPL7L1|PPIF|RPL24|SNRPE|RPL26|FKBP9|DNASE1L2|CRYAB|DLX5|MYCBP2|RPL11|RPS27L|HSD17B10|DEDD2|PPP2CA|PRDX2|DNAJB1|EXOSC5|RPS15A|SERTAD1|ERBB3|RPS3|DNAJB9|EGR1|XBP1|EGR2|UBE2H|EGR3|GADD4…
32502	2.5308E-11	4.6946E-8	70	2855	307	28943	developmental process	BTG2|CITED2|RORA|ENO1|PRDM1|HMGB1|CLU|TGM1|LGALS3|CCND1|MYC|CTSH|CCHCR1|KRTDAP|TEAD4|DST|PAQR5|LMO4|IFRD1|CTNNBIP1|RPS6|ARID5B|SLC30A1|MIF|OVOL1|SERPINB5|LOR|APRT|ARL4A|LY6D|RPL24|PFN1|CRYAB|GAPDH|CD44|CD63|DLX5|DAPL1|MYCBP2|ABHD5|HMGCR|NDRG2|KLK8|EVPL|PPP2CA|PRDX2|SOCS3|HECTD1|ERBB3|MYO6|EGR1|XBP1|EGR2|EGR3|GADD45B|UBE2B|HSPA5|CNFN|GRHL1|HOPX|SRPK1|SOD1|PSMC3|KRT17|GJB3|KRT14|ID4|ID3|CD9|BCL2L1
7275	6.6466E-11	1.2329E-7	66	2660	307	28943	multicellular organismal development	BTG2|CITED2|RORA|ENO1|PRDM1|HMGB1|CLU|TGM1|LGALS3|CCND1|MYC|CTSH|CCHCR1|KRTDAP|TEAD4|DST|PAQR5|LMO4|IFRD1|CTNNBIP1|RPS6|ARID5B|SLC30A1|MIF|OVOL1|SERPINB5|LOR|APRT|LY6D|RPL24|PFN1|CRYAB|GAPDH|CD44|CD63|DLX5|MYCBP2|HMGCR|NDRG2|KLK8|EVPL|PPP2CA|PRDX2|SOCS3|HECTD1|ERBB3|MYO6|EGR1|XBP1|EGR2|EGR3|GADD45B|UBE2B|HSPA5|CNFN|GRHL1|HOPX|SOD1|PSMC3|KRT17|GJB3|KRT14|ID4|ID3|CD9|BCL2L1
10467	1.6997E-10	3.1529E-7	59	2278	307	28943	gene expression	CARS|BTG2|CALCOCO1|RORA|PRDM1|RPL8|RPS15|EEF1B2|RPS17|RPL18A|RPS19|MYC|RPLP2|RPL37|EMB|RPS11|TEAD4|RPS9|RPS7|LMO4|RPL23|RPS6|MRPS18A|ARID5B|OVOL1|EEF1A1|EEF1G|RPL7L1|RPL24|SNRPE|RPL26|DLX5|MYCBP2|RPL11|RPS27L|HSD17B10|DEDD2|EXOSC5|RPS15A|SERTAD1|RPS3|EGR1|XBP1|EGR2|EGR3|GRHL1|NPM3|EEF2|HOPX|SRPK1|EIF1|NR4A1|HNRNPA2B1|EIF3G|FOSB|RPL22L1|STUB1|RPS21|NOP10
48869	5.2795E-10	9.7935E-7	49	1740	307	28943	cellular developmental process	BTG2|CITED2|RORA|PRDM1|HMGB1|CLU|TGM1|LGALS3|CCND1|CCHCR1|KRTDAP|TEAD4|DST|PAQR5|IFRD1|RPS6|MIF|LOR|ARL4A|LY6D|RPL24|CRYAB|CD44|CD63|DLX5|DAPL1|MYCBP2|ABHD5|NDRG2|KLK8|EVPL|SOCS3|ERBB3|MYO6|EGR1|XBP1|EGR2|GADD45B|UBE2B|CNFN|HOPX|SRPK1|SOD1|KRT17|KRT14|ID4|ID3|CD9|BCL2L1
48519	5.3650E-10	9.9520E-7	47	1625	307	28943	negative regulation of biological process	CD63|CDKN1A|BTG2|IDE|ABHD5|HMGB1|ATP1A1|KLK8|CLU|ADIPOR2|TOB1|PRDX2|SOCS3|SERTAD1|CCND1|ERBB3|FTH1|MYC|ARL6IP5|EGR1|DUSP5|SLC15A1|ANXA1|UBE2B|HSPA5|DST|TSC22D3|MID1IP1|ANXA5|SPINK5|CTNNBIP1|RPS6|NME2|SLC30A1|MIF|OVOL1|HOPX|SOD1|DDIT4|ID4|ID3|CD9|PFN1|CRYAB|CD44|PNPLA2|BCL2L1
30154	7.0636E-10	1.3103E-6	48	1697	307	28943	cell differentiation	CD63|BTG2|CITED2|DLX5|DAPL1|MYCBP2|RORA|PRDM1|ABHD5|HMGB1|NDRG2|KLK8|EVPL|CLU|TGM1|LGALS3|SOCS3|CCND1|ERBB3|MYO6|CCHCR1|KRTDAP|TEAD4|EGR1|XBP1|EGR2|GADD45B|UBE2B|DST|PAQR5|IFRD1|RPS6|MIF|CNFN|LOR|HOPX|SRPK1|SOD1|ARL4A|KRT17|KRT14|ID4|LY6D|RPL24|ID3|CRYAB|CD44|BCL2L1
60429	8.9964E-10	1.6688E-6	20	334	307	28943	epithelium development	CD63|XBP1|LMO4|DLX5|CTNNBIP1|CNFN|EVPL|SERPINB5|LOR|TGM1|SOCS3|HECTD1|KRT17|CCND1|MYC|KRT14|ID3|CTSH|PFN1|CD44
48856	1.8427E-9	3.4182E-6	58	2363	307	28943	anatomical structure development	BTG2|CITED2|RORA|PRDM1|HMGB1|CLU|TGM1|LGALS3|CCND1|MYC|CTSH|KRTDAP|TEAD4|DST|LMO4|IFRD1|CTNNBIP1|RPS6|ARID5B|MIF|OVOL1|SERPINB5|LOR|APRT|LY6D|RPL24|PFN1|CRYAB|CD44|CD63|DLX5|MYCBP2|NDRG2|KLK8|EVPL|PPP2CA|PRDX2|SOCS3|HECTD1|ERBB3|MYO6|EGR1|XBP1|EGR2|EGR3|UBE2B|HSPA5|CNFN|HOPX|SOD1|PSMC3|KRT17|GJB3|KRT14|ID4|ID3|CD9|BCL2L1
6629	3.4182E-9	6.3407E-6	28	703	307	28943	lipid metabolic process	GDPD2|GDPD3|ALOX12B|ABHD5|HMGCR|ADIPOR2|PLD3|UGCG|SMPD2|ALOXE3|FDFT1|ELOVL1|PLA2G12A|STARD5|DGAT2|ELOVL4|HMGCS1|MBOAT2|ELOVL7|SULT2B1|RBP2|ACSBG1|DEGS2|OSBPL1A|LRP10|SMPDL3A|GPLD1|PNPLA2
48731	3.4666E-9	6.4305E-6	54	2151	307	28943	system development	BTG2|CITED2|RORA|PRDM1|HMGB1|CLU|TGM1|LGALS3|CCND1|MYC|CTSH|KRTDAP|DST|LMO4|CTNNBIP1|RPS6|ARID5B|MIF|OVOL1|SERPINB5|LOR|APRT|LY6D|RPL24|PFN1|CRYAB|CD44|CD63|DLX5|MYCBP2|NDRG2|KLK8|EVPL|PPP2CA|PRDX2|SOCS3|HECTD1|ERBB3|MYO6|EGR1|XBP1|EGR2|EGR3|HSPA5|CNFN|HOPX|SOD1|KRT17|GJB3|KRT14|ID4|ID3|CD9|BCL2L1
48523	4.0146E-9	7.4471E-6	42	1441	307	28943	negative regulation of cellular process	CD63|CDKN1A|BTG2|IDE|HMGB1|ATP1A1|KLK8|CLU|ADIPOR2|TOB1|PRDX2|SOCS3|SERTAD1|CCND1|ERBB3|FTH1|MYC|EGR1|DUSP5|ANXA1|UBE2B|HSPA5|DST|TSC22D3|MID1IP1|SPINK5|CTNNBIP1|RPS6|NME2|SLC30A1|MIF|OVOL1|HOPX|SOD1|DDIT4|ID4|ID3|CD9|PFN1|CRYAB|CD44|BCL2L1
48513	1.3182E-8	2.4452E-5	45	1680	307	28943	organ development	CD63|CITED2|DLX5|RORA|PRDM1|HMGB1|EVPL|CLU|PPP2CA|TGM1|PRDX2|SOCS3|HECTD1|CCND1|ERBB3|MYC|MYO6|CTSH|KRTDAP|EGR1|XBP1|EGR2|HSPA5|LMO4|CTNNBIP1|RPS6|ARID5B|OVOL1|CNFN|SERPINB5|LOR|HOPX|APRT|SOD1|KRT17|GJB3|KRT14|ID4|LY6D|RPL24|ID3|PFN1|CRYAB|CD44|BCL2L1
34645	2.8174E-8	5.2263E-5	51	2097	307	28943	cellular macromolecule biosynthetic process	CARS|BTG2|CALCOCO1|RORA|PRDM1|RPL8|RPS15|EEF1B2|RPS17|RPL18A|RPS19|MYC|RPLP2|RPL37|EMB|RPS11|TEAD4|RPS9|RPS7|LMO4|RPL23|MRPS18A|ARID5B|OVOL1|EEF1A1|EEF1G|RPL7L1|RPL24|RPL26|DLX5|MYCBP2|RPL11|RPS27L|DEDD2|RPS15A|SERTAD1|RPS3|EGR1|XBP1|EGR2|EGR3|GRHL1|NPM3|EEF2|HOPX|EIF1|NR4A1|EIF3G|FOSB|RPL22L1|RPS21
9059	3.2744E-8	6.0741E-5	51	2107	307	28943	macromolecule biosynthetic process	CARS|BTG2|CALCOCO1|RORA|PRDM1|RPL8|RPS15|EEF1B2|RPS17|RPL18A|RPS19|MYC|RPLP2|RPL37|EMB|RPS11|TEAD4|RPS9|RPS7|LMO4|RPL23|MRPS18A|ARID5B|OVOL1|EEF1A1|EEF1G|RPL7L1|RPL24|RPL26|DLX5|MYCBP2|RPL11|RPS27L|DEDD2|RPS15A|SERTAD1|RPS3|EGR1|XBP1|EGR2|EGR3|GRHL1|NPM3|EEF2|HOPX|EIF1|NR4A1|EIF3G|FOSB|RPL22L1|RPS21
71445	5.8138E-8	1.0785E-4	7	31	307	28943	cellular response to protein stimulus	EGR1|XBP1|CCND1|HSPA5|HMGCS1|MYC|HERPUD1
44281	5.8154E-8	1.0788E-4	38	1350	307	28943	small molecule metabolic process	CARS|BTG2|GLO1|MGST1|GDPD2|GDPD3|ALOX12B|RORA|IDE|ABHD5|HMGCR|ATP1A1|SAT1|ADIPOR2|OPA1|MYC|ALOXE3|ATP6V1C2|FDFT1|ELOVL1|DGAT2|ELOVL4|MDH1|UBE2B|HMGCS1|NME2|ELOVL7|SDHB|LOR|APRT|SOD1|BCKDK|ARL4A|ACSBG1|DEGS2|P4HB|CRYAB|PNPLA2
10941	6.5123E-8	1.2080E-4	25	661	307	28943	regulation of cell death	CDKN1A|BTG2|HMGB1|CLU|DEDD2|HERPUD1|PRDX2|ERBB3|FTH1|MYC|USP7|ANXA1|UBE2B|TSC22D3|ANXA5|RPS6|MIF|SOD1|NR4A1|PPIF|ID3|CRYAB|CD44|BCL2L1|BNIPL
65008	8.9208E-8	1.6548E-4	37	1315	307	28943	regulation of biological quality	CD81|ARPC5L|GLRX|IDE|PARK7|ATP1A1|AQP3|KLK8|LIN7B|ADIPOR2|HERPUD1|PRDX2|SLC9A3R1|SERTAD1|FTH1|MYO6|CTSH|SH3BGRL3|EGR1|XBP1|EGR2|USP7|ANXA1|ANXA5|RPS6|SLC30A1|MIF|MT4|PRDX6|SOD1|KRT17|CDC42EP3|PPIF|CD9|P4HB|PFN1|CRYAB
44255	1.1228E-7	2.0829E-4	21	493	307	28943	cellular lipid metabolic process	ELOVL1|PLA2G12A|DGAT2|ELOVL4|HMGCS1|MBOAT2|ALOX12B|ELOVL7|ABHD5|HMGCR|ADIPOR2|UGCG|SMPD2|RBP2|ACSBG1|DEGS2|SMPDL3A|ALOXE3|GPLD1|FDFT1|PNPLA2
42981	1.3647E-7	2.5316E-4	24	639	307	28943	regulation of apoptosis	CDKN1A|BTG2|USP7|ANXA1|UBE2B|TSC22D3|ANXA5|RPS6|MIF|HMGB1|CLU|DEDD2|HERPUD1|SOD1|PRDX2|NR4A1|ERBB3|MYC|PPIF|ID3|CRYAB|CD44|BCL2L1|BNIPL
43067	1.7532E-7	3.2521E-4	24	648	307	28943	regulation of programmed cell death	CDKN1A|BTG2|USP7|ANXA1|UBE2B|TSC22D3|ANXA5|RPS6|MIF|HMGB1|CLU|DEDD2|HERPUD1|SOD1|PRDX2|NR4A1|ERBB3|MYC|PPIF|ID3|CRYAB|CD44|BCL2L1|BNIPL
60548	4.1062E-7	7.6170E-4	16	316	307	28943	negative regulation of cell death	CDKN1A|BTG2|ANXA1|UBE2B|TSC22D3|RPS6|MIF|CLU|SOD1|PRDX2|ERBB3|FTH1|MYC|CRYAB|CD44|BCL2L1
19222	5.9336E-7	1.1007E-3	60	2934	307	28943	regulation of metabolic process	CDKN1A|BTG2|CALCOCO1|CITED2|RORA|IDE|PRDM1|HMGB1|CCND1|MYC|CTSH|EMB|TEAD4|MAP2K3|DUSP5|USP7|ANXA1|LMO4|TSC22D3|SPINK5|CTNNBIP1|NME2|ARID5B|MIF|OVOL1|PFN1|CRYAB|CD44|DLX5|MYCBP2|ABHD5|HMGCR|ATP1A1|TOB1|DEDD2|PRDX2|SOCS3|SERTAD1|CREG1|EGR1|XBP1|EGR2|UBE2H|EGR3|GADD45B|UBE2B|HSPA5|IL34|GRHL1|HOPX|FBXO30|SRPK1|SOD1|NR4A1|KRT17|ID4|ID3|FOSB|STUB1|PNPLA2
50794	6.7060E-7	1.2440E-3	105	6372	307	28943	regulation of cellular process	CD81|ARPC5L|RORA|PRDM1|CLU|SAT1|CCND1|FTH1|MYC|MAP3K8|MAP2K3|USP7|LMO4|SPINK5|CTNNBIP1|RPS6|ARID5B|SLC30A1|MIF|OVOL1|BCAM|DDIT4|PPIF|RPL24|PFN1|DLX5|GPR87|MYCBP2|ABHD5|NDRG2|KLK8|ADIPOR2|DEDD2|PRDX2|SLC9A3R1|SOCS3|MYO6|EGR1|XBP1|EGR2|EGR3|GADD45B|UBE2B|HSPA5|GNG12|PRDX6|HOPX|FBXO30|SRPK1|GNG13|NR4A1|ID4|ID3|LRP10|BCL2L1|CDKN1A|BTG2|CALCOCO1|CITED2|IDE|HMGB1|HERPUD1|SMPD2|RACK1|CTSH|SH3BGRL3|EMB|T…
65007	7.4684E-7	1.3854E-3	114	7124	307	28943	biological regulation	CD81|ARPC5L|RORA|PRDM1|PARK7|AQP3|CLU|SAT1|CCND1|FTH1|MYC|ARL6IP5|MAP3K8|MAP2K3|SLC15A1|USP7|LMO4|SPINK5|CTNNBIP1|RPS6|ARID5B|SLC30A1|MIF|OVOL1|BCAM|DDIT4|PPIF|PSME2|RPL24|PFN1|DLX5|GPR87|MYCBP2|ABHD5|NDRG2|KLK8|LIN7B|ADIPOR2|DEDD2|PRDX2|SLC9A3R1|SOCS3|MYO6|EGR1|XBP1|EGR2|UBE2H|EGR3|GADD45B|UBE2B|HSPA5|GNG12|MT4|PRDX6|HOPX|FBXO30|SRPK1|GNG13|NR4A1|ID4|ID3|LRP10|BCL2L1|CDKN1A|BTG2|CALCOCO1|CITED2|…
9888	8.5236E-7	1.5811E-3	24	709	307	28943	tissue development	KRTDAP|CD63|XBP1|CITED2|LMO4|DLX5|CTNNBIP1|OVOL1|CNFN|EVPL|SERPINB5|LOR|PPP2CA|TGM1|SOCS3|HECTD1|KRT17|CCND1|MYC|KRT14|ID3|CTSH|PFN1|CD44
8610	8.9885E-7	1.6674E-3	15	295	307	28943	lipid biosynthetic process	ELOVL1|STARD5|DGAT2|ELOVL4|HMGCS1|MBOAT2|ALOX12B|ELOVL7|ABHD5|HMGCR|UGCG|SMPD2|DEGS2|ALOXE3|FDFT1
51789	9.1712E-7	1.7013E-3	9	93	307	28943	response to protein stimulus	EGR1|XBP1|CCND1|HSPA5|HMGCS1|MYC|ID3|HERPUD1|BCL2L1
43066	1.1489E-6	2.1313E-3	15	301	307	28943	negative regulation of apoptosis	CDKN1A|BTG2|ANXA1|UBE2B|TSC22D3|RPS6|MIF|CLU|SOD1|PRDX2|ERBB3|MYC|CRYAB|CD44|BCL2L1
50789	1.2313E-6	2.2841E-3	108	6697	307	28943	regulation of biological process	CD81|ARPC5L|RORA|PRDM1|CLU|SAT1|CCND1|FTH1|MYC|ARL6IP5|MAP3K8|MAP2K3|SLC15A1|USP7|LMO4|SPINK5|CTNNBIP1|RPS6|ARID5B|SLC30A1|MIF|OVOL1|BCAM|DDIT4|PPIF|RPL24|PFN1|DLX5|GPR87|MYCBP2|ABHD5|NDRG2|KLK8|ADIPOR2|DEDD2|PRDX2|SLC9A3R1|SOCS3|MYO6|EGR1|XBP1|EGR2|UBE2H|EGR3|GADD45B|UBE2B|HSPA5|GNG12|PRDX6|HOPX|FBXO30|SRPK1|GNG13|NR4A1|ID4|ID3|LRP10|BCL2L1|CDKN1A|BTG2|CALCOCO1|CITED2|IDE|HMGB1|HERPUD1|SMPD2|RAC…
48518	1.3861E-6	2.5712E-3	43	1854	307	28943	positive regulation of biological process	CD63|CDKN1A|BTG2|CALCOCO1|CD81|DLX5|RORA|PRDM1|ABHD5|HMGB1|HMGCR|ATP1A1|CLU|ADIPOR2|SOCS3|SERTAD1|CCND1|ERBB3|MYC|CTSH|TEAD4|EGR1|RANBP1|EGR2|USP7|ANXA1|UBE2B|HSPA5|IL34|ANXA5|NME2|MIF|HOPX|NR4A1|KRT17|ID4|ID3|STUB1|PFN1|CD44|PNPLA2|BCL2L1|BNIPL
43069	1.4033E-6	2.6031E-3	15	306	307	28943	negative regulation of programmed cell death	CDKN1A|BTG2|ANXA1|UBE2B|TSC22D3|RPS6|MIF|CLU|SOD1|PRDX2|ERBB3|MYC|CRYAB|CD44|BCL2L1
44248	1.7045E-6	3.1619E-3	22	635	307	28943	cellular catabolic process	USP7|MDH1|USP5|HSPA5|IDE|ATP1A1|PRDX6|SAT1|SDHB|LOR|SOD1|BCKDK|PRDX2|ARL4A|MAP1LC3A|OPA1|MYC|RAB24|DNASE1L2|SMPDL3A|ATP6V1C2|PNPLA2
31323	1.7236E-6	3.1973E-3	56	2749	307	28943	regulation of cellular metabolic process	CDKN1A|BTG2|CALCOCO1|CITED2|RORA|IDE|PRDM1|HMGB1|CCND1|MYC|EMB|TEAD4|MAP2K3|DUSP5|ANXA1|LMO4|TSC22D3|SPINK5|CTNNBIP1|NME2|ARID5B|MIF|OVOL1|PFN1|CD44|DLX5|MYCBP2|ABHD5|HMGCR|ATP1A1|TOB1|DEDD2|PRDX2|SOCS3|SERTAD1|CREG1|EGR1|XBP1|EGR2|EGR3|GADD45B|UBE2B|HSPA5|IL34|GRHL1|HOPX|FBXO30|SRPK1|SOD1|NR4A1|KRT17|ID4|ID3|FOSB|STUB1|PNPLA2
42221	2.3135E-6	4.2915E-3	30	1086	307	28943	response to chemical stimulus	SLC46A2|MGST1|PARK7|HMGB1|ATP1A1|ADIPOR2|HERPUD1|PRDX2|CCND1|S100A16|MYC|MYO6|CTSH|EGR1|XBP1|EGR2|EGLN3|ANXA1|HSPA5|HMGCS1|ANXA5|SLC30A1|MT4|PRDX6|SOD1|DDIT4|ID3|ACSBG1|CRYAB|BCL2L1
51726	2.3400E-6	4.3406E-3	13	239	307	28943	regulation of cell cycle	RANBP1|CDKN1A|GADD45B|UBE2B|DST|MYCBP2|RPS6|HMGB1|PPP2CA|CCND1|MYC|RPL24|ID3
30855	2.6193E-6	4.8588E-3	10	136	307	28943	epithelial cell differentiation	TGM1|CD63|XBP1|KRT17|DLX5|KRT14|ID3|CNFN|EVPL|LOR
42542	3.4776E-6	6.4510E-3	6	37	307	28943	response to hydrogen peroxide	PRDX2|ANXA1|PARK7|PRDX6|CRYAB|SOD1
6810	3.6504E-6	6.7716E-3	49	2330	307	28943	transport	IPO13|GLTP|CHIC2|SLC46A2|CLIC3|CLTB|PARK7|AQP3|SAT1|DDA1|SEC61A1|FTH1|ARL6IP5|TMED3|CCHCR1|SLC39A2|GOLGA7|SH3GL1|GABARAPL2|SLC15A1|STARD5|ANXA1|DST|ELMOD1|SLC30A1|NIPA2|KCTD5|SDHB|NDUFS8|RBP2|PPIF|GLRX|ATP1A1|LIN7B|TOB1|MYO6|RAB24|SNX9|SLC25A25|ATP6V1C2|RANBP1|XBP1|SLC16A1|NDUFA4|MCOLN1|EHD2|OSBPL1A|LRP10|KCNK1
9056	3.8960E-6	7.2270E-3	25	830	307	28943	catabolic process	IDE|ATP1A1|SAT1|PLD3|PRDX2|MAP1LC3A|OPA1|MYC|RAB24|ATP6V1C2|USP7|PLA2G12A|MDH1|USP5|HSPA5|PRDX6|SDHB|LOR|SOD1|BCKDK|ARL4A|PSMC3|DNASE1L2|SMPDL3A|PNPLA2
51234	4.5514E-6	8.4428E-3	49	2349	307	28943	establishment of localization	IPO13|GLTP|CHIC2|SLC46A2|CLIC3|CLTB|PARK7|AQP3|SAT1|DDA1|SEC61A1|FTH1|ARL6IP5|TMED3|CCHCR1|SLC39A2|GOLGA7|SH3GL1|GABARAPL2|SLC15A1|STARD5|ANXA1|DST|ELMOD1|SLC30A1|NIPA2|KCTD5|SDHB|NDUFS8|RBP2|PPIF|GLRX|ATP1A1|LIN7B|TOB1|MYO6|RAB24|SNX9|SLC25A25|ATP6V1C2|RANBP1|XBP1|SLC16A1|NDUFA4|MCOLN1|EHD2|OSBPL1A|LRP10|KCNK1
32501	4.6054E-6	8.5431E-3	79	4553	307	28943	multicellular organismal process	BTG2|CITED2|RORA|ENO1|PRDM1|PARK7|HMGB1|AQP3|CLU|TGM1|LGALS3|CCND1|OPA1|MYC|CTSH|CCHCR1|KRTDAP|TEAD4|MAP2K3|DST|PAQR5|LMO4|IFRD1|ANXA5|CTNNBIP1|RPS6|ARID5B|SLC30A1|MIF|OVOL1|SERPINB5|LOR|APRT|LY6D|RPL24|PFN1|CRYAB|GAPDH|CD44|CD63|CSTB|DLX5|MYCBP2|HMGCR|ATP1A1|NDRG2|KLK8|EVPL|LIN7B|PPP2CA|PRDX2|SOCS3|HECTD1|ERBB3|MYO6|MPZL3|EGR1|XBP1|EGR2|EGR3|GADD45B|UBE2B|HSPA5|HMGA1|CNFN|GRHL1|MT4|HOPX|GNG13|SO…
9653	4.7225E-6	8.7603E-3	31	1186	307	28943	anatomical structure morphogenesis	CITED2|DLX5|MYCBP2|RORA|HMGB1|KLK8|CLU|TGM1|SOCS3|HECTD1|MYC|MYO6|CTSH|TEAD4|EGR2|UBE2B|HSPA5|DST|LMO4|CTNNBIP1|RPS6|ARID5B|SERPINB5|HOPX|SOD1|KRT17|RPL24|CD9|PFN1|CRYAB|CD44
[truncated: 205 more columns]

[truncated: 2 more sheets: S2K. Marker genes Immune, S2L. BiNGO analysis Immune]
