# Supplementary material for: Single-cell transcriptomics reveals age-resistant maintenance of cell identities, stem cell compartments and differentiation trajectories in long-lived naked mole-rats skin
Source: Aging (Albany NY). 2022 May 4;14(9):3728–56. doi: 10.18632/aging.204054 (PMC9134947; doi:10.18632/aging.204054)
Supplement: Supplementary Data File 3 [file aging-14-204054-s005.xlsx]

## Sheet: S3A. Results
Supplementary Data file 3A. Specific enrichment analysis of naked mole-rats keratinocytes for ROS, aging and wound healing functions.
a Fisher exact-test was performed on a list of genes compiled from REACTOME (ROS) and GO terms (aging and wound healing) databases. Results with uncorrected p-value ≤ 0.05 were considered enriched.
P-value of Enrichment test (Fisher exact test)
	basal1	basal2	corneum	immunology	intermediate1	intermediate2	21 genes Young vs Aged
Aging	0.2232	1	0.397722	0.460278	1	0.311189	1
ROS	0.146492	1	0.0100617	0.00655281	1	1	1
Wound healing	0.00585902	1	0.317756	0.0595096	1	0.0020818	1
Genes in intersection
	basal1	basal2	corneum	immunology	intermediate1	intermediate2	21 genes Young vs Aged
Aging	Krt14	NA	Krt14, Sod1	Krt14	NA	Krt14	NA
ROS	Cyba	NA	Prdx6, P4hb, Sod1, Prdx2	Cyba, Prdx2, Prdx5	NA	NA	NA
Wound healing	Cav1, Dst, Dsp	NA	Dst, Evpl, Serpinb2	Dst, Dsp, Sdc4	NA	Dst, Dsp, Evpl, Serpinb2	NA

## Sheet: S3B. Databases
Supplementary Data file 3B. Databases used for specific enrichment analysis of naked mole rats keratinocytes for ROS, aging and wound healing functions.
ROS		Wound healing		Aging
Symbol	Gene Name	Symbol	Gene Name	Symbol	Gene Name
Prdx3	peroxiredoxin 3	Macf1	microtubule-actin crosslinking factor 1	C1qa	complement component 1, q subcomponent, alpha polypeptide
Prdx6	peroxiredoxin 6	Eng	endoglin	Eif2s1	eukaryotic translation initiation factor 2, subunit 1 alpha
Cat	catalase	Pdgfra	platelet derived growth factor receptor, alpha polypeptide	Cd68	CD68 antigen
Ccs	copper chaperone for superoxide dismutase	Col1a1	collagen, type I, alpha 1	Polg	polymerase (DNA directed), gamma
Cyba	cytochrome b-245, alpha polypeptide	Col3a1	collagen, type III, alpha 1	mt-Nd4	mitochondrially encoded NADH dehydrogenase 4
Cybb	cytochrome b-245, beta polypeptide	Fgf10	fibroblast growth factor 10	Cdkn1c	cyclin-dependent kinase inhibitor 1C (P57)
Gpx1	glutathione peroxidase 1	Cav1	caveolin 1, caveolae protein	Ogg1	8-oxoguanine DNA-glycosylase 1
Gpx3	glutathione peroxidase 3	Dst	dystonin	Ctc1	CTS telomere maintenance complex component 1
Gpx5	glutathione peroxidase 5	Msx2	msh homeobox 2	Apoe	apolipoprotein E
Gsr	glutathione reductase	Bnc1	basonuclin 1	Apod	apolipoprotein D
Gstp2	glutathione S-transferase, pi 2	Cx3cl1	chemokine (C-X3-C motif) ligand 1	Apex1	apurinic/apyrimidinic endonuclease 1
Gstp1	glutathione S-transferase, pi 1	Dsp	desmoplakin	Adra1a	adrenergic receptor, alpha 1a
Ncf1	neutrophil cytosolic factor 1	Celsr1	cadherin, EGF LAG seven-pass G-type receptor 1	Cdkn2a	cyclin dependent kinase inhibitor 2A
Ncf2	neutrophil cytosolic factor 2	Krt6a	keratin 6A	Krt16	keratin 16
Ncf4	neutrophil cytosolic factor 4	Ppara	peroxisome proliferator activated receptor alpha	Krt14	keratin 14
P4hb	prolyl 4-hydroxylase, beta polypeptide	Nog	noggin	Gsk3a	glycogen synthase kinase 3 alpha
Prdx1	peroxiredoxin 1	Ppl	periplakin	Krt83	keratin 83
Sod1	superoxide dismutase 1, soluble	Ins2	insulin II	Akt1	thymoma viral proto-oncogene 1
Sod2	superoxide dismutase 2, mitochondrial	Epb41l4b	erythrocyte membrane protein band 4.1 like 4b	Sod1	superoxide dismutase 1, soluble
Sod3	superoxide dismutase 3, extracellular	Fgfr1op2	FGFR1 oncogene partner 2	Krt25	keratin 25
Prdx2	peroxiredoxin 2	Drd5	dopamine receptor D5	Scp2	sterol carrier protein 2, liver
Txn1	thioredoxin 1	Smad4	SMAD family member 4	Pde4d	phosphodiesterase 4D, cAMP specific
Prdx6b	peroxiredoxin 6B	Alox15	arachidonate 15-lipoxygenase	Sin3a	transcriptional regulator, SIN3A (yeast)
Nox4	NADPH oxidase 4	Grhl3	grainyhead like transcription factor 3	Msra	methionine sulfoxide reductase A
Txnrd1	thioredoxin reductase 1	Tpm1	tropomyosin 1, alpha	Krtap4-16	keratin associated protein 4-16
Ero1l	ERO1-like (S. cerevisiae)	Ccm2l	cerebral cavernous malformation 2-like	Xlch	X-linked cardiac hypertrophy
Prdx5	peroxiredoxin 5	Adrb2	adrenergic receptor, beta 2	Capn10	calpain 10
Txn2	thioredoxin 2	Adrb1	adrenergic receptor, beta 1	Shc1	src homology 2 domain-containing transforming protein C1
Nudt2	nudix (nucleoside diphosphate linked moiety X)-type motif 2	Sdc1	syndecan 1	Adra1d	adrenergic receptor, alpha 1d
Gpx7	glutathione peroxidase 7	Scrib	scribbled planar cell polarity	Fbxo4	F-box protein 4
Gpx8	glutathione peroxidase 8 (putative)	Coro1b	coronin, actin binding protein 1B	Tsc2	TSC complex subunit 2
Gpx6	glutathione peroxidase 6	Slc11a1	solute carrier family 11 (proton-coupled divalent metal ion transporters), member 1	Abat	4-aminobutyrate aminotransferase
		Notch2	notch 2	Gnao1	guanine nucleotide binding protein, alpha O
		Aqp1	aquaporin 1	Cyp27b1	cytochrome P450, family 27, subfamily b, polypeptide 1
		Pecam1	platelet/endothelial cell adhesion molecule 1	Mapk3	mitogen-activated protein kinase 3
		Nlrp6	NLR family, pyrin domain containing 6	Mapk1	mitogen-activated protein kinase 1
		Ptk7	PTK7 protein tyrosine kinase 7	Ercc2	excision repair cross-complementing rodent repair deficiency, complementation group 2
		Pak1	p21 (RAC1) activated kinase 1	Aldoc	aldolase C, fructose-bisphosphate
		Nbeal2	neurobeachin-like 2	Mmp9	matrix metallopeptidase 9
		Plec	plectin	Mmp2	matrix metallopeptidase 2
		Mustn1	musculoskeletal, embryonic nuclear protein 1	Grb2	growth factor receptor bound protein 2
		Crp	C-reactive protein, pentraxin-related	Kl	klotho
		Elk3	ELK3, member of ETS oncogene family	Atp8a2	ATPase, aminophospholipid transporter-like, class I, type 8A, member 2
		Egfr	epidermal growth factor receptor	Ncam1	neural cell adhesion molecule 1
		Fntb	farnesyltransferase, CAAX box, beta	Foxo3	forkhead box O3
		Fn1	fibronectin 1	Acmsd	amino carboxymuconate semialdehyde decarboxylase
		Fgf7	fibroblast growth factor 7	Cnr1	cannabinoid receptor 1 (brain)
		Fgf2	fibroblast growth factor 2	Eif2b5	eukaryotic translation initiation factor 2B, subunit 5 epsilon
		B4galt1	UDP-Gal:betaGlcNAc beta 1,4- galactosyltransferase, polypeptide 1	Pax5	paired box 5
		Map3k1	mitogen-activated protein kinase kinase kinase 1	Slc18a2	solute carrier family 18 (vesicular monoamine), member 2
		Erbb2	erb-b2 receptor tyrosine kinase 2	Ifi27l2a	interferon, alpha-inducible protein 27 like 2A
		Ppard	peroxisome proliferator activator receptor delta
		Arhgef19	Rho guanine nucleotide exchange factor (GEF) 19
		Mmp12	matrix metallopeptidase 12
		BC004004	cDNA sequence BC004004
		A0A2I3BRT4	Epiplakin
		Dcbld2	discoidin, CUB and LCCL domain containing 2
		Vangl2	VANGL planar cell polarity 2
		Evpl	envoplakin
		Lox	lysyl oxidase
		Sdc4	syndecan 4
		Serpinb2	serine (or cysteine) peptidase inhibitor, clade B, member 2
		Eppk1	epiplakin 1
		Mia3	melanoma inhibitory activity 3
		Hpse	heparanase
		Cnn2	calponin 2
		Plau	plasminogen activator, urokinase
		Wnt5a	wingless-type MMTV integration site family, member 5A
		Treml1	triggering receptor expressed on myeloid cells-like 1
		Tgfb2	transforming growth factor, beta 2
		Tgfb1	transforming growth factor, beta 1
		BC024139	cDNA sequence BC024139
		Nf1	neurofibromin 1
		Pou2f3	POU domain, class 2, transcription factor 3
