# Supplementary material for: Single-cell transcriptomics reveals age-resistant maintenance of cell identities, stem cell compartments and differentiation trajectories in long-lived naked mole-rats skin
Source: Aging (Albany NY). 2022 May 4;14(9):3728–56. doi: 10.18632/aging.204054 (PMC9134947; doi:10.18632/aging.204054)
Supplement: Supplementary Data File 4 [file aging-14-204054-s006.xlsx]

## Sheet: S4A. By cluster
Supplementary Data file 4A. Differentially expressed genes by cluster between young and middle-aged animals.
List of The Differentially Expressed Genes in Each Cluster Between Young and Middle-Aged Cells
cluster	gene	avg exp young	avg exp middle-aged	pct young	pct middle-aged	avg_logFC	abs avg_logFC	p_val	p_val_adj		Number of differentially expressed genes by cluster:
1	TPPP3	7.66251	2.92559	0.952	0.759	0.791487	0.791487	1.37329e-81	2.69989e-77		Cluster ID	0	1	2	3	4	5	6	7	8	9	10
1	CXCL8	2.45629	0.751167	0.297	0.184	0.679914	0.679914	8.16702e-08	0.00160564		Nb Reg Genes	0	5	0	1	3	1	2	23	2	8	68
1	IL1R2	2.05516	0.617456	0.529	0.243	0.635978	0.635978	3.12637e-32	6.14643e-28
1	ENSHGLG00000007289	9.51883	4.6054	0.775	0.685	0.629436	0.629436	3.5089e-16	6.8985e-12
1	GBP1	0.885995	0.077509	0.23	0.036	0.559803	0.559803	4.61875e-23	9.08047e-19
3	TPPP3	6.73159	3.45205	0.948	0.874	0.551951	0.551951	1.22511e-37	2.40856e-33
4	KRT10	55.0044	29.6067	0.962	0.977	0.604211	0.604211	5.69576e-26	1.11979e-21
4	ENSHGLG00000004684	1.08101	0.185884	0.397	0.113	0.562365	0.562365	5.03394e-27	9.89673e-23
4	SPINK5	5.31281	2.73394	0.551	0.439	0.525116	0.525116	1.15548e-06	0.0227167
5	KRT10	63.5497	38.0786	0.998	0.996	0.50186	0.50186	3.45902e-35	6.80043e-31
6	TPPP3	8.35055	3.91874	0.894	0.783	0.642383	0.642383	9.80188e-32	1.92705e-27
6	ENSHGLG00000004684	0.984156	0.145386	0.374	0.082	0.549452	0.549452	1.21252e-27	2.38381e-23
7	ENSHGLG00000002542	18.8984	56.2911	0.998	1	-1.05751	1.05751	3.11876e-141	6.13147e-137
7	IGFBP3	2.10769	7.82733	0.558	0.903	-1.04397	1.04397	2.88382e-58	5.6696e-54
7	HMGCS2	1.87877	0.253032	0.634	0.163	0.831796	0.831796	6.61121e-61	1.29976e-56
7	GBP1	1.34809	0.13701	0.347	0.072	0.7252	0.7252	4.67452e-28	9.1901e-24
7	ATP1A1	1.70482	4.43508	0.605	0.932	-0.697839	0.697839	2.11282e-52	4.1538e-48
7	EHF	1.70485	4.25857	0.564	0.889	-0.66481	0.66481	1.55968e-44	3.06634e-40
7	SPARC	2.62395	0.874383	0.738	0.384	0.659286	0.659286	1.42736e-39	2.8062e-35
7	ENSHGLG00000010945	2.28107	5.32232	0.742	0.964	-0.655916	0.655916	2.50567e-65	4.92615e-61
7	ENSHGLG00000010594	1.16912	3.03731	0.518	0.863	-0.62126	0.62126	8.04024e-45	1.58071e-40
7	HSPA8	9.99473	19.3409	0.985	1	-0.615216	0.615216	4.44962e-70	8.74795e-66
7	ENSHGLG00000004684	1.00323	0.0832547	0.467	0.06	0.614792	0.614792	7.89327e-50	1.55182e-45
7	LGALS3BP	0.553496	1.83496	0.258	0.69	-0.60152	0.60152	2.44309e-41	4.80312e-37
7	RRAD	0.34503	1.43014	0.095	0.334	-0.591533	0.591533	3.97852e-19	7.82178e-15
7	MYC	7.45279	13.8294	0.943	0.982	-0.562113	0.562113	1.38336e-38	2.71968e-34
7	CA2	0.136518	0.975797	0.076	0.388	-0.553003	0.553003	1.86194e-30	3.66058e-26
7	ENSHGLG00000030156	0.38427	1.40502	0.207	0.614	-0.552386	0.552386	7.12201e-37	1.40019e-32
7	ADAMTS1	0.573028	1.69188	0.205	0.449	-0.537239	0.537239	2.27693e-16	4.47645e-12
7	FOSB	0.90367	2.24785	0.368	0.684	-0.534209	0.534209	2.56252e-23	5.03792e-19
7	SLC38A2	3.71092	7.03358	0.837	0.978	-0.533747	0.533747	1.40807e-36	2.76827e-32
7	S100A4	10.2176	17.8474	0.981	0.996	-0.518889	0.518889	7.08221e-35	1.39236e-30
7	ENSHGLG00000000004	7.73988	13.6111	0.947	0.99	-0.513887	0.513887	1.26665e-26	2.49023e-22
7	CEBPD	2.05982	0.841164	0.636	0.425	0.507958	0.507958	1.1516e-20	2.26405e-16
7	TSC22D1	4.09725	7.41945	0.588	0.801	-0.501844	0.501844	1.16032e-14	2.28119e-10
8	KRT10	26.6753	13.9693	0.835	0.779	0.614537	0.614537	0.000104962	1
8	ENSHGLG00000016610	2.74907	1.12373	0.62	0.519	0.568334	0.568334	0.0031542	1
9	ENSHGLG00000004768	16.5072	6.26552	0.763	0.624	0.879472	0.879472	0.000281308	1
9	HSPH1	4.0036	1.74334	0.611	0.44	0.600983	0.600983	0.00117911	1
9	TGM1	2.15716	0.734828	0.45	0.211	0.598763	0.598763	4.13646e-05	0.813228
9	HSPB1	47.1132	25.9152	1	0.972	0.580867	0.580867	4.25713e-08	0.000836952
9	LY6G6C	4.92774	2.3849	0.511	0.294	0.560318	0.560318	0.000425005	1
9	ENSHGLG00000005893	0.924504	0.132024	0.214	0.046	0.530661	0.530661	0.000164478	1
9	IL36RN	1.69957	0.591375	0.244	0.128	0.528496	0.528496	0.0226372	1
9	RPL22L1	5.4558	9.87886	0.756	0.881	-0.521842	0.521842	6.20714e-08	0.00122032
10	S100A9	0.0638378	20.789	0.043	0.467	-3.01952	3.01952	8.74867e-05	1
10	ENSHGLG00000004445	0.798767	21.6306	0.174	0.6	-2.5322	2.5322	0.00106181	1
10	KRT17	0.362594	6.39624	0.174	0.4	-1.69158	1.69158	0.0354647	1
10	S100P	3.18126	16.7101	0.522	0.867	-1.44352	1.44352	0.00977575	1
10	KRT5	3.74577	17.5811	0.478	0.667	-1.36489	1.36489	0.0261007	1
10	ENSHGLG00000029151	1.94789	0.230714	0.478	0.133	0.873495	0.873495	0.0131521	1
10	IDO1	1.73304	5.19996	0.304	0.667	-0.819128	0.819128	0.0105996	1
10	DUT	0.803525	3.083	0.261	0.667	-0.817088	0.817088	0.00315625	1
10	TUBA4A	0.533654	2.36789	0.152	0.667	-0.786632	0.786632	0.000268003	1
10	ENSHGLG00000006290	0.464651	2.18864	0.239	0.6	-0.777978	0.777978	0.00220965	1
10	ENSHGLG00000002277	0	1.15888	0	0.2	-0.769588	0.769588	0.00220235	1
10	AQP3	2.82832	7.17655	0.543	0.933	-0.758845	0.758845	0.00105081	1
10	TNC	0.180737	1.4768	0.065	0.267	-0.74083	0.74083	0.0293472	1
10	RARRES2	0.31541	1.75717	0.065	0.267	-0.740055	0.740055	0.0341523	1
10	Clu	0.702292	2.54841	0.196	0.467	-0.734524	0.734524	0.0295928	1
10	MTSS1	0.420643	1.89706	0.174	0.467	-0.712589	0.712589	0.0245025	1
10	DCXR	1.0518	0.0405515	0.37	0.067	0.678969	0.678969	0.0194198	1
10	SLC2A1	0.39849	1.71772	0.152	0.467	-0.664399	0.664399	0.0154649	1
10	NR4A1	8.85273	4.09505	0.804	0.733	0.659478	0.659478	0.0499219	1
10	ENSHGLG00000016626	1.88824	0.504549	0.609	0.4	0.652154	0.652154	0.0159694	1
10	BATF3	0.398885	1.6766	0.109	0.467	-0.648871	0.648871	0.00337013	1
10	NRBF2	2.11356	0.628997	0.543	0.333	0.647801	0.647801	0.0396551	1
10	PSMB8	0.827455	2.47394	0.326	0.733	-0.642366	0.642366	0.00644551	1
10	SRP54	0.104084	1.09487	0.065	0.467	-0.640475	0.640475	0.000262342	1
10	C1QA	0.896481	0	0.239	0	0.64	0.64	0.0404887	1
10	ENSHGLG00000015814	2.67144	5.8633	0.304	0.6	-0.625604	0.625604	0.0335714	1
10	TP53	0.341708	1.49512	0.152	0.733	-0.620393	0.620393	4.86887e-05	0.95722
10	C12orf57	3.64475	1.52422	0.783	0.733	0.609807	0.609807	0.0142196	1
10	ANKRD12	5.41882	2.49278	0.804	0.667	0.608537	0.608537	0.0183246	1
10	CKS1B	0.502699	1.7583	0.217	0.467	-0.607351	0.607351	0.0315056	1
10	MT4	3.13284	6.55979	0.391	0.8	-0.603878	0.603878	0.0230299	1
10	PTRH2	0.0370659	0.883722	0.022	0.467	-0.596854	0.596854	1.17441e-05	0.230889
10	HOMER2	9.91113	5.00831	0.978	1	0.596639	0.596639	0.000350705	1
10	ENSHGLG00000027133	0.0819171	0.959602	0.043	0.333	-0.594007	0.594007	0.00235615	1
10	PLEK2	0.280728	1.31735	0.13	0.467	-0.592996	0.592996	0.00483033	1
10	ENSHGLG00000007134	0.135472	1.03844	0.065	0.6	-0.585135	0.585135	1.65334e-05	0.325047
10	ENSHGLG00000027442	0.785016	0	0.326	0	0.579428	0.579428	0.013071	1
10	NUPR1	0.161107	1.06084	0.087	0.333	-0.573741	0.573741	0.0188586	1
10	ENSHGLG00000007289	0.46951	1.605	0.087	0.4	-0.572504	0.572504	0.00663369	1
10	LETM1	0.324848	1.34398	0.152	0.6	-0.570554	0.570554	0.00140854	1
10	ENSHGLG00000012052	0.30754	1.30254	0.13	0.533	-0.565867	0.565867	0.00140168	1
10	CXCL14	0.0704593	0.884081	0.043	0.267	-0.565352	0.565352	0.0120143	1
10	ENSHGLG00000004540	0.142014	1.00996	0.087	0.467	-0.56532	0.56532	0.00085168	1
10	GRIPAP1	0.758238	0	0.239	0	0.564312	0.564312	0.0404887	1
10	ENSHGLG00000021380	0.575422	1.75466	0.261	0.6	-0.55877	0.55877	0.00990437	1
10	CDK2	0.243604	1.17317	0.109	0.6	-0.558174	0.558174	0.000168098	1
10	ENSHGLG00000029841	0	0.744509	0	0.333	-0.556473	0.556473	5.5569e-05	1
10	KCNK1	0.236936	1.15162	0.13	0.467	-0.553583	0.553583	0.00483033	1
10	ENSHGLG00000020318	0.19645	1.06839	0.087	0.6	-0.547413	0.547413	6.04944e-05	1
10	REXO2	0.412189	1.43676	0.152	0.6	-0.545527	0.545527	0.00130652	1
10	ATP5F1B	4.46849	8.43239	0.696	0.933	-0.545148	0.545148	0.00146926	1
10	PLA2G5	0.0424344	0.785049	0.022	0.267	-0.537887	0.537887	0.00276835	1
10	ARMCX3	0.824862	0.0676133	0.326	0.067	0.536079	0.536079	0.0387092	1
10	MRPL41	0.77274	0.0405515	0.37	0.067	0.532775	0.532775	0.0194198	1
10	PTPRC	9.32061	5.087	0.848	0.733	0.527987	0.527987	0.037262	1
10	FHL2	1.24005	2.77816	0.391	0.867	-0.522738	0.522738	0.00363393	1
10	CHIC2	0.147031	0.930797	0.087	0.533	-0.520756	0.520756	0.000192944	1
10	DSP	2.15763	4.3093	0.283	0.6	-0.51964	0.51964	0.0152671	1
10	ENSHGLG00000000738	0.295086	1.17533	0.152	0.533	-0.518602	0.518602	0.00298449	1
10	LAMTOR4	0.668986	1.78544	0.304	0.667	-0.512189	0.512189	0.0249516	1
10	HMGCS1	0.714399	1.85004	0.283	0.667	-0.508272	0.508272	0.00890686	1
10	ENSHGLG00000016273	0.0955404	0.81706	0.065	0.467	-0.505972	0.505972	0.00035431	1
10	MTERF3	0.657545	0	0.261	0	0.505338	0.505338	0.0308011	1
10	TRAF7	0.261728	1.08811	0.13	0.467	-0.503776	0.503776	0.00690896	1
10	ENSHGLG00000011147	0.539933	1.5457	0.217	0.667	-0.502667	0.502667	0.0030748	1
10	CAPN12	0.0739971	0.773624	0.043	0.533	-0.501638	0.501638	1.713e-05	0.336777
10	CDKL2	0.38792	1.29188	0.174	0.533	-0.501567	0.501567	0.0116741	1
10	LGALS3BP	1.26438	2.73378	0.37	0.8	-0.500122	0.500122	0.00913052	1

## Sheet: S4B. By metacluster
Supplementary Data file S4B. Differentially expressed genes by metacluster between young and middle-aged animals.
List of The Differentially Expressed Genes in Each MetaCluster Between Young and Middle-Aged Cells
cluster	gene	avg exp young	avg exp middle-aged	pct young	pct middle-aged	avg_logFC	abs avg_logFC	p_val	p_val_adj		Number of differentially expressed genes by Metacluster:
Basal1	TPPP3	7.46452	3.4506	0.921	0.783	0.642844	0.642844	1.04e-122	2.04965e-118		Metacluster ID	Basal1	Basal2	Corneum	Immune	Intermediate1	Intermediate2
Basal2	TPPP3	6.73159	3.45205	0.948	0.874	0.551951	0.551951	1.22511e-37	2.40856e-33		Nb Reg Genes	1	1	2	70	2	0
Corneum	KRT10	26.6753	13.9693	0.835	0.779	0.614537	0.614537	0.000104962	1
Corneum	ENSHGLG00000016610	2.74907	1.12373	0.62	0.519	0.568334	0.568334	0.0031542	1
Immune	S100A9	0.0638378	20.789	0.043	0.467	-3.01952	3.01952	8.75e-05	1
Immune	ENSHGLG00000004445	0.798767	21.6306	0.174	0.6	-2.5322	2.5322	0.00106181	1
Immune	KRT17	0.362594	6.39624	0.174	0.4	-1.69158	1.69158	0.0354647	1
Immune	S100P	3.18126	16.7101	0.522	0.867	-1.44352	1.44352	0.00977575	1
Immune	KRT5	3.74577	17.5811	0.478	0.667	-1.36489	1.36489	0.0261007	1
Immune	ENSHGLG00000029151	1.94789	0.230714	0.478	0.133	0.873495	0.873495	0.0131521	1
Immune	IDO1	1.73304	5.19996	0.304	0.667	-0.819128	0.819128	0.0105996	1
Immune	DUT	0.803525	3.083	0.261	0.667	-0.817088	0.817088	0.00315625	1
Immune	TUBA4A	0.533654	2.36789	0.152	0.667	-0.786632	0.786632	0.000268003	1
Immune	ENSHGLG00000006290	0.464651	2.18864	0.239	0.6	-0.777978	0.777978	0.00220965	1
Immune	ENSHGLG00000002277	0	1.15888	0	0.2	-0.769588	0.769588	0.00220235	1
Immune	AQP3	2.82832	7.17655	0.543	0.933	-0.758845	0.758845	0.00105081	1
Immune	TNC	0.180737	1.4768	0.065	0.267	-0.74083	0.74083	0.0293472	1
Immune	RARRES2	0.31541	1.75717	0.065	0.267	-0.740055	0.740055	0.0341523	1
Immune	Clu	0.702292	2.54841	0.196	0.467	-0.734524	0.734524	0.0295928	1
Immune	MTSS1	0.420643	1.89706	0.174	0.467	-0.712589	0.712589	0.0245025	1
Immune	DCXR	1.0518	0.0405515	0.37	0.067	0.678969	0.678969	0.0194198	1
Immune	SLC2A1	0.39849	1.71772	0.152	0.467	-0.664399	0.664399	0.0154649	1
Immune	NR4A1	8.85273	4.09505	0.804	0.733	0.659478	0.659478	0.0499219	1
Immune	ENSHGLG00000016626	1.88824	0.504549	0.609	0.4	0.652154	0.652154	0.0159694	1
Immune	BATF3	0.398885	1.6766	0.109	0.467	-0.648871	0.648871	0.00337013	1
Immune	NRBF2	2.11356	0.628997	0.543	0.333	0.647801	0.647801	0.0396551	1
Immune	PSMB8	0.827455	2.47394	0.326	0.733	-0.642366	0.642366	0.00644551	1
Immune	SRP54	0.104084	1.09487	0.065	0.467	-0.640475	0.640475	0.000262342	1
Immune	C1QA	0.896481	0	0.239	0	0.64	0.64	0.0404887	1
Immune	ENSHGLG00000015814	2.67144	5.8633	0.304	0.6	-0.625604	0.625604	0.0335714	1
Immune	TP53	0.341708	1.49512	0.152	0.733	-0.620393	0.620393	4.87e-05	0.95722
Immune	C12orf57	3.64475	1.52422	0.783	0.733	0.609807	0.609807	0.0142196	1
Immune	ANKRD12	5.41882	2.49278	0.804	0.667	0.608537	0.608537	0.0183246	1
Immune	CKS1B	0.502699	1.7583	0.217	0.467	-0.607351	0.607351	0.0315056	1
Immune	MT4	3.13284	6.55979	0.391	0.8	-0.603878	0.603878	0.0230299	1
Immune	PTRH2	0.0370659	0.883722	0.022	0.467	-0.596854	0.596854	1.17e-05	0.230889
Immune	HOMER2	9.91113	5.00831	0.978	1	0.596639	0.596639	0.000350705	1
Immune	ENSHGLG00000027133	0.0819171	0.959602	0.043	0.333	-0.594007	0.594007	0.00235615	1
Immune	PLEK2	0.280728	1.31735	0.13	0.467	-0.592996	0.592996	0.00483033	1
Immune	ENSHGLG00000007134	0.135472	1.03844	0.065	0.6	-0.585135	0.585135	1.65e-05	0.325047
Immune	ENSHGLG00000027442	0.785016	0	0.326	0	0.579428	0.579428	0.013071	1
Immune	NUPR1	0.161107	1.06084	0.087	0.333	-0.573741	0.573741	0.0188586	1
Immune	ENSHGLG00000007289	0.46951	1.605	0.087	0.4	-0.572504	0.572504	0.00663369	1
Immune	LETM1	0.324848	1.34398	0.152	0.6	-0.570554	0.570554	0.00140854	1
Immune	ENSHGLG00000012052	0.30754	1.30254	0.13	0.533	-0.565867	0.565867	0.00140168	1
Immune	CXCL14	0.0704593	0.884081	0.043	0.267	-0.565352	0.565352	0.0120143	1
Immune	ENSHGLG00000004540	0.142014	1.00996	0.087	0.467	-0.56532	0.56532	0.00085168	1
Immune	GRIPAP1	0.758238	0	0.239	0	0.564312	0.564312	0.0404887	1
Immune	ENSHGLG00000021380	0.575422	1.75466	0.261	0.6	-0.55877	0.55877	0.00990437	1
Immune	CDK2	0.243604	1.17317	0.109	0.6	-0.558174	0.558174	0.000168098	1
Immune	ENSHGLG00000029841	0	0.744509	0	0.333	-0.556473	0.556473	5.56e-05	1
Immune	KCNK1	0.236936	1.15162	0.13	0.467	-0.553583	0.553583	0.00483033	1
Immune	ENSHGLG00000020318	0.19645	1.06839	0.087	0.6	-0.547413	0.547413	6.05e-05	1
Immune	REXO2	0.412189	1.43676	0.152	0.6	-0.545527	0.545527	0.00130652	1
Immune	ATP5F1B	4.46849	8.43239	0.696	0.933	-0.545148	0.545148	0.00146926	1
Immune	PLA2G5	0.0424344	0.785049	0.022	0.267	-0.537887	0.537887	0.00276835	1
Immune	ARMCX3	0.824862	0.0676133	0.326	0.067	0.536079	0.536079	0.0387092	1
Immune	MRPL41	0.77274	0.0405515	0.37	0.067	0.532775	0.532775	0.0194198	1
Immune	PTPRC	9.32061	5.087	0.848	0.733	0.527987	0.527987	0.037262	1
Immune	FHL2	1.24005	2.77816	0.391	0.867	-0.522738	0.522738	0.00363393	1
Immune	CHIC2	0.147031	0.930797	0.087	0.533	-0.520756	0.520756	0.000192944	1
Immune	DSP	2.15763	4.3093	0.283	0.6	-0.51964	0.51964	0.0152671	1
Immune	ENSHGLG00000000738	0.295086	1.17533	0.152	0.533	-0.518602	0.518602	0.00298449	1
Immune	LAMTOR4	0.668986	1.78544	0.304	0.667	-0.512189	0.512189	0.0249516	1
Immune	HMGCS1	0.714399	1.85004	0.283	0.667	-0.508272	0.508272	0.00890686	1
Immune	ENSHGLG00000016273	0.0955404	0.81706	0.065	0.467	-0.505972	0.505972	0.00035431	1
Immune	MTERF3	0.657545	0	0.261	0	0.505338	0.505338	0.0308011	1
Immune	TRAF7	0.261728	1.08811	0.13	0.467	-0.503776	0.503776	0.00690896	1
Immune	ENSHGLG00000011147	0.539933	1.5457	0.217	0.667	-0.502667	0.502667	0.0030748	1
Immune	CAPN12	0.0739971	0.773624	0.043	0.533	-0.501638	0.501638	1.71e-05	0.336777
Immune	CDKL2	0.38792	1.29188	0.174	0.533	-0.501567	0.501567	0.0116741	1
Immune	LGALS3BP	1.26438	2.73378	0.37	0.8	-0.500122	0.500122	0.00913052	1
Immune	IP6K2	0.647341	0	0.239	0	0.499162	0.499162	0.0404887	1
Immune	FH	0.321355	1.174	0.152	0.667	-0.497912	0.497912	0.000371336	1
Intermediate1	KRT10	41.011	23.1963	0.973	0.974	0.551732	0.551732	6.11e-45	1.20191e-40
Intermediate1	ENSHGLG00000004684	0.926309	0.153757	0.395	0.108	0.512582	0.512582	1.67e-67	3.28463e-63
